# Supplementary material for: Dietary Restriction Induced Longevity Is Mediated by Nuclear Receptor NHR-62 in Caenorhabditis elegans
Source: PLoS Genet. 2013 Jul 25;9(7):e1003651. doi: 10.1371/journal.pgen.1003651 (PMC3723528; doi:10.1371/journal.pgen.1003651)
Supplement: Table S4 — Genes regulated in eat-2 versus N2. (XLSX) [file pgen.1003651.s012.xlsx]

## Sheet: Sheet1
Gene ID		Base Mean Ave.		Base Mean N2	Base Mean eat-2	eat-2 vs N2 fold-change	eat-2 vs N2 fold-change (log2)	eat-2 vs N2 (pval)	eat-2 vs N2 (padj)
F59D8.1		14225.3		26294.7	2155.92	0.0819907	-3.6084	1.2886e-189	2.82268e-185
C09G5.4		3017.19		421.564	5612.83	13.3143	3.7349	3.4753e-176	3.80632e-172
C04F6.1		110068		192631	27505.2	0.142787	-2.80806	1.65396e-138	1.20767e-134
C17C3.12		1574.67		3107.87	41.4744	0.013345	-6.22756	1.83956e-119	1.00739e-115
T06E4.6		294.241		11.3926	577.09	50.6547	5.66263	2.6158e-90	1.14598e-86
F59D8.2		12601.7		21658.2	3545.13	0.163686	-2.611	2.4247e-89	8.85216e-86
ZC168.5		225.668		1.58942	449.746	282.963	8.14447	3.31343e-87	1.03687e-83
K09F5.2		94735.6		163922	25549.7	0.155865	-2.68163	1.36202e-77	3.72938e-74
T06E4.4		1921.82		379.805	3463.83	9.12002	3.18904	8.83232e-73	2.14969e-69
F09E10.3		3101.46		5049.35	1153.58	0.22846	-2.12999	4.0619e-72	8.89759e-69
K02D7.3		19227		29976	8477.91	0.282823	-1.82203	6.88636e-62	1.37133e-58
C42D4.3		362.727		10.4219	715.033	68.6087	6.10032	7.75791e-60	1.41614e-56
ZC21.3		1344.93		505.787	2184.08	4.31817	2.11042	1.20726e-58	2.03423e-55
C31B8.4		277.353		45.4851	509.22	11.1953	3.48482	2.88029e-55	4.50662e-52
F15H10.1		375.485		88.7029	662.266	7.46612	2.90036	6.71649e-51	9.80831e-48
C43C3.1		640.286		218.116	1062.46	4.87107	2.28424	2.015e-50	2.75866e-47
T05A12.4		1522.8		2383.89	661.712	0.277576	-1.84904	8.79268e-50	1.13296e-46
F21F8.4		693.335		1218.46	168.205	0.138046	-2.85677	1.11151e-47	1.35265e-44
F35B3.4		186.473		6.5651	366.382	55.8075	5.80239	2.84555e-47	3.28062e-44
K10H10.4		103.112		0.529806	205.695	388.246	8.60083	3.06686e-47	3.35898e-44
F46F2.3		1626		2812.6	439.408	0.156228	-2.67827	3.8371e-44	4.00246e-41
Y53F4B.45		524.934		190.025	859.842	4.52489	2.17788	1.66854e-43	1.66133e-40
ZC15.8		832.36		356.913	1307.81	3.66422	1.8735	8.78615e-41	8.36785e-38
K07H8.6		746303		1.08382e+06	408782	0.377166	-1.40673	1.68464e-40	1.53758e-37
C09B8.4		132.018		251.167	12.868	0.0512329	-4.28679	2.80577e-40	2.45842e-37
F29F11.2		105.719		2.7083	208.729	77.0704	6.2681	6.01475e-39	5.06743e-36
F57A8.6		193.385		36.1525	350.618	9.69831	3.27773	4.33583e-38	3.39201e-35
F43C11.3		420.14		107.013	733.267	6.85216	2.77656	4.30889e-38	3.39201e-35
C06E8.5		121.676		4.35698	238.996	54.8535	5.77751	2.85625e-37	2.15745e-34
F10C1.7		4944.48		2660.3	7228.65	2.71723	1.44214	3.01992e-37	2.20505e-34
T05A10.5		677.648		295.386	1059.91	3.58823	1.84327	2.61805e-36	1.79214e-33
Y73F4A.2		1098.65		529.31	1667.99	3.15124	1.65592	2.56758e-36	1.79214e-33
ZC116.1		666.572		292.066	1041.08	3.56454	1.83371	4.15966e-36	2.76113e-33
C53C9.2		2911.8		1552.75	4270.86	2.75052	1.4597	6.938e-36	4.46991e-33
T08B1.2		1661.78		854.523	2469.04	2.88938	1.53076	1.9687e-35	1.23212e-32
T19D2.1		528.557		200.777	856.337	4.26513	2.09259	9.92769e-34	6.04072e-31
W01B11.5		382.775		144.195	621.355	4.30913	2.1074	1.27648e-33	7.55709e-31
F13H8.3		546.349		850.192	242.505	0.285235	-1.80978	2.89073e-33	1.66635e-30
Y48E1B.8		181.424		323.983	38.8646	0.119959	-3.05939	1.77277e-31	9.95704e-29
F21C10.8		960.817		490.031	1431.6	2.92146	1.54669	1.47032e-30	8.05184e-28
T05A10.3		1269.42		579.807	1959.04	3.37877	1.7565	1.39002e-29	7.42646e-27
Y57G11B.5		5667.2		8157.53	3176.87	0.38944	-1.36053	3.55378e-29	1.85347e-26
H02F09.3		142.058		30.6731	253.444	8.26275	3.04662	3.8393e-29	1.91136e-26
F59E11.5		490.464		221.235	759.693	3.43387	1.77984	3.821e-29	1.91136e-26
Y27F2A.3		976.738		1438.69	514.788	0.357818	-1.4827	1.14432e-28	5.57031e-26
C25B8.3		14007.9		19491.9	8524.02	0.437312	-1.19326	6.32847e-28	3.01359e-25
F15H10.2		160.364		32.6477	288.081	8.82392	3.14142	7.05777e-28	3.28937e-25
F53A9.8		433.529		152.865	714.192	4.67204	2.22405	2.86936e-27	1.30944e-24
T01D1.6		96.8434		13.7193	179.967	13.1179	3.71346	6.05075e-27	2.70493e-24
C05C10.4		1916.15		3238.26	594.047	0.183447	-2.44657	1.01276e-26	4.4369e-24
C03A7.14		73.6364		1.08924	146.184	134.206	7.06831	1.74522e-26	7.49588e-24
T11B7.3		1234.17		695.504	1772.83	2.54899	1.34993	2.53511e-26	1.06791e-23
F09G8.6		257.447		10.5108	504.383	47.9871	5.58458	4.07956e-26	1.68609e-23
ZK673.7		905.251		495.428	1315.07	2.65442	1.40839	9.40978e-26	3.81706e-23
Y54F10AM.2		309.118		127.086	491.149	3.8647	1.95036	1.11597e-25	4.44461e-23
C40H1.7		267.05		111.577	422.523	3.78682	1.92099	1.15683e-25	4.52505e-23
F09C12.8		308.286		125.474	491.099	3.91395	1.96862	1.36249e-25	5.23603e-23
C34D4.15		142.293		30.5877	253.998	8.30393	3.05379	3.38267e-25	1.27754e-22
F48E8.1		1066.26		1511.95	620.561	0.410437	-1.28477	1.00804e-23	3.74257e-21
Y119D3B.9		153.248		35.8265	270.67	7.55501	2.91743	1.09616e-23	4.00188e-21
K02D7.1		3026.05		1887.54	4164.55	2.20634	1.14166	1.13427e-23	4.07316e-21
F23B12.4		1091.79		631.924	1551.65	2.45543	1.29598	1.47382e-23	5.20709e-21
M6.1		7658.05		4867.86	10448.2	2.14637	1.1019	3.58409e-23	1.24618e-20
C42D8.2		413972		556799	271146	0.486972	-1.03809	3.78746e-23	1.29632e-20
F35A5.3		65.2854		5.38696	125.184	23.2383	4.53843	5.10731e-23	1.72116e-20
F47B7.7		703.983		323.769	1084.2	3.34868	1.74359	8.28699e-23	2.7504e-20
F28G4.1		51.1096		2.73793	99.4814	36.3346	5.18327	2.51649e-22	8.22742e-20
T21C9.9		73.4983		8.18415	138.812	16.9611	4.08416	2.89226e-22	9.31689e-20
W03F8.1		2253.74		1412.05	3095.43	2.19216	1.13235	5.2915e-22	1.67986e-19
B0496.3		1538.85		861.915	2215.79	2.57077	1.3622	7.87246e-22	2.46352e-19
F16C3.2		377.39		189.814	564.966	2.97642	1.57358	1.26996e-21	3.91809e-19
Y95B8A.2		131.75		37.1825	226.317	6.08665	2.60565	1.5693e-21	4.77439e-19
F11C1.5		4011.51		5419.77	2603.26	0.480327	-1.05791	1.77368e-21	5.32226e-19
C16E9.1		244.077		105.627	382.527	3.62149	1.85658	2.51907e-21	7.45679e-19
Y37D8A.5		230.458		96.5646	364.352	3.77314	1.91576	3.31993e-21	9.69642e-19
T20B3.12		170.82		63.9098	277.73	4.34565	2.11957	3.72849e-21	1.07464e-18
F35B12.6		429.159		223.884	634.433	2.83376	1.50272	4.29196e-21	1.22098e-18
F09F7.4		8271.67		11087	5456.3	0.492133	-1.02288	5.22259e-21	1.46668e-18
ZK863.8		284.113		133.066	435.159	3.27026	1.70941	8.45129e-21	2.34336e-18
F10G2.3		745.424		370.829	1120.02	3.02031	1.5947	1.03972e-20	2.84155e-18
F44C4.3		9813.25		6510.6	13115.9	2.01455	1.01046	1.05074e-20	2.84155e-18
Y48A6B.7		743.161		432.338	1053.98	2.43787	1.28562	1.15401e-20	3.08277e-18
C16D9.1		131.077		39.1832	222.972	5.69049	2.50855	1.25379e-20	3.30894e-18
F54F7.3		1433.97		873.485	1994.46	2.28334	1.19114	1.51851e-20	3.95988e-18
T20G5.7		1395.53		861.285	1929.78	2.24059	1.16388	1.63719e-20	4.21912e-18
Y73F4A.3		289.768		117.691	461.845	3.92423	1.97241	1.74382e-20	4.44167e-18
Y57G11C.5		270.06		124.737	415.383	3.33007	1.73555	2.12852e-20	5.35922e-18
T22B11.4		1151.95		705.09	1598.81	2.26753	1.18112	3.62843e-20	9.0319e-18
ZK1225.4		214.12		90.2923	337.947	3.74282	1.90412	4.5165e-20	1.11162e-17
F26G1.5		232.379		99.9473	364.81	3.65002	1.8679	4.5777e-20	1.11416e-17
Y51H4A.9		63.4472		6.00566	120.889	20.1292	4.33121	4.97112e-20	1.19662e-17
C17C3.1		1481.58		2035.1	928.065	0.456029	-1.1328	5.09436e-20	1.21295e-17
F42G9.7		876.15		1224.87	527.429	0.4306	-1.21558	5.33282e-20	1.25608e-17
F18E3.13		543.532		790.528	296.536	0.375111	-1.41461	5.50845e-20	1.28364e-17
C30B5.3		376.202		162.127	590.278	3.64084	1.86427	1.02308e-19	2.359e-17
F37B4.2		1136.42		662.691	1610.15	2.42971	1.28078	1.36571e-19	3.11623e-17
C31H1.5		372.858		194.656	551.06	2.83094	1.50128	1.55985e-19	3.52252e-17
H13N06.6		5034.05		6685.71	3382.39	0.505913	-0.983039	2.71131e-19	6.06033e-17
F45E4.5		161.671		56.4925	266.85	4.72363	2.23989	2.96193e-19	6.4881e-17
T25B9.7		362.112		187.873	536.351	2.85486	1.51342	2.94212e-19	6.4881e-17
C44B9.2		179.735		59.4972	299.974	5.04182	2.33394	4.5174e-19	9.79739e-17
C03A7.8		34.1242		0	68.2484	Inf	Inf	5.47525e-19	1.17584e-16
F17C11.4		1114.67		696.991	1532.35	2.19852	1.13653	5.58216e-19	1.18716e-16
R12H7.2		7913.81		10448.8	5378.87	0.514786	-0.957955	5.79686e-19	1.22096e-16
F56A11.6		267.374		128.742	406.007	3.15365	1.65702	7.07823e-19	1.47665e-16
T04F8.7		202.421		85.4316	319.41	3.73878	1.90257	7.31071e-19	1.51077e-16
C14C6.2		615.952		359.329	872.576	2.42835	1.27998	8.78991e-19	1.79947e-16
F49D11.8		2357.71		1547.72	3167.7	2.04669	1.03329	9.22093e-19	1.87023e-16
Y71G12B.27		316.964		160.034	473.894	2.96121	1.56619	1.24205e-18	2.49606e-16
T10B10.6		266.175		131.121	401.229	3.06	1.61353	1.34008e-18	2.66859e-16
K07E3.3		601.512		846.599	356.426	0.421009	-1.24808	1.43912e-18	2.83998e-16
F36A2.11		170.498		68.4778	272.519	3.97967	1.99265	1.48581e-18	2.90594e-16
F23H12.8		528.88		204.252	853.509	4.17871	2.06306	1.64702e-18	3.19274e-16
R09B5.5		67.5137		12.6004	122.427	9.71613	3.28038	2.6256e-18	5.04507e-16
E04D5.3		168.451		66.7698	270.132	4.04572	2.0164	2.8242e-18	5.37949e-16
F35B12.3		726.613		401.746	1051.48	2.61727	1.38806	3.20323e-18	6.04886e-16
F14E5.4		166.84		70.7712	262.908	3.7149	1.89332	3.94734e-18	7.3903e-16
Y49F6B.8		169.742		68.4778	271.006	3.95757	1.98462	4.25917e-18	7.90654e-16
W05G11.6		3511.34		4782.27	2240.42	0.468485	-1.09393	4.78898e-18	8.81535e-16
F09E10.11		4389.15		1627.01	7151.3	4.39536	2.13598	5.16683e-18	9.43161e-16
F23D12.6		192.493		42.362	342.625	8.08802	3.01579	5.5089e-18	9.97293e-16
F30F8.2		543.592		315.443	771.741	2.44653	1.29074	5.6867e-18	1.02104e-15
C28D4.7		311.162		161.567	460.757	2.8518	1.51187	6.38555e-18	1.1372e-15
T05B4.3		603.865		350.737	856.993	2.44341	1.28889	8.6712e-18	1.5318e-15
F01D5.1		339.472		180.525	498.42	2.76094	1.46516	9.59851e-18	1.68204e-15
ZC434.9		1470.58		953.763	1987.4	2.08375	1.05918	1.46088e-17	2.53972e-15
C11E4.2		243.713		109.306	378.119	3.45927	1.79047	1.52737e-17	2.61382e-15
F13D12.9		354.664		162.538	546.79	3.36408	1.75021	1.52674e-17	2.61382e-15
C26H9A.2		2469.69		3262.82	1676.56	0.513837	-0.960619	1.58934e-17	2.6988e-15
W04A4.2		386.29		558.052	214.529	0.384424	-1.37923	1.64091e-17	2.76493e-15
F53F8.4		385.326		211.373	559.28	2.64594	1.40378	1.73068e-17	2.89393e-15
C01F1.3		319.223		465.186	173.26	0.372454	-1.42487	1.79306e-17	2.97552e-15
C30F2.3		139.852		51.5465	228.157	4.42624	2.14608	2.33139e-17	3.83979e-15
Y54G2A.11		2893.7		1585.93	4201.46	2.64921	1.40556	2.6941e-17	4.40404e-15
F11H8.3		25685		33514.2	17855.9	0.532785	-0.908376	3.03584e-17	4.92593e-15
C44B12.1		13671.8		17810.3	9533.29	0.535268	-0.901666	3.22122e-17	5.18829e-15
C39B5.5		799.86		436.857	1162.86	2.66188	1.41245	3.29213e-17	5.26381e-15
C03A7.4		31.7603		0	63.5206	Inf	Inf	3.904e-17	6.19689e-15
C39D10.7		23477		30399.4	16554.5	0.544568	-0.876815	4.06989e-17	6.41373e-15
F18E3.11		481.71		705.879	257.541	0.364852	-1.45462	4.29775e-17	6.72445e-15
T03F1.11		624.248		377.231	871.264	2.30963	1.20766	4.46102e-17	6.93041e-15
T05F1.11		137.477		54.403	220.551	4.05402	2.01935	5.40278e-17	8.33436e-15
K06A9.1		720.332		384.259	1056.41	2.7492	1.45901	5.49871e-17	8.42303e-15
F28A10.6		2685.16		3548.89	1821.43	0.51324	-0.962293	7.04255e-17	1.0713e-14
ZC455.1		250.621		124.17	377.073	3.03674	1.60252	7.74403e-17	1.16731e-14
T19C3.1		272.955		137.719	408.192	2.96395	1.56752	7.78031e-17	1.16731e-14
C23F12.1		5207.94		2668.09	7747.79	2.90387	1.53798	8.56591e-17	1.27644e-14
F59A3.8		207.599		97.0648	318.133	3.27753	1.71261	9.06558e-17	1.34177e-14
H04M03.2		35.3137		0.529806	70.0975	132.308	7.04775	9.57038e-17	1.40697e-14
ZK938.1		1229.97		691.31	1768.63	2.55838	1.35523	1.22941e-16	1.79535e-14
C30G4.7		231.57		113.897	349.244	3.06632	1.61651	1.43325e-16	2.07916e-14
F42C5.10		2327.21		1573.04	3081.38	1.95887	0.97002	1.62929e-16	2.348e-14
T16D1.2		639.399		389.386	889.411	2.28413	1.19165	1.73283e-16	2.48089e-14
Y46C8AR.1		55.4875		12.8931	98.0819	7.60729	2.92738	1.81505e-16	2.58173e-14
F49F1.5		134.781		27.9055	241.656	8.65979	3.11433	2.20418e-16	3.11501e-14
T22G5.2		699.805		436.424	963.186	2.20699	1.14208	2.86093e-16	4.01722e-14
C18H2.1		254.523		128.268	380.779	2.96863	1.5698	3.25794e-16	4.54555e-14
T23F1.6		33.7756		0.529806	67.0213	126.501	6.98301	4.62772e-16	6.37548e-14
ZK622.4		207.878		99.4732	316.284	3.17958	1.66884	4.61695e-16	6.37548e-14
E03G2.4		89.8614		26.2604	153.462	5.84387	2.54692	4.72269e-16	6.46566e-14
F47D12.7		400.07		213.292	586.848	2.75139	1.46016	4.85505e-16	6.60558e-14
H23N18.1		913.459		588.633	1238.28	2.10366	1.0729	5.71999e-16	7.73435e-14
F18E3.12		355.859		523.186	188.532	0.360354	-1.47251	5.97188e-16	8.02541e-14
C54G4.3		239.793		98.3911	381.195	3.87429	1.95393	6.27906e-16	8.38676e-14
W03F11.4		954.322		478.785	1429.86	2.98643	1.57842	6.79317e-16	9.01845e-14
C50H2.12		114.382		24.0523	204.712	8.51112	3.08935	7.80844e-16	1.02815e-13
C52B9.3		373.633		208.687	538.579	2.5808	1.36782	7.83844e-16	1.02815e-13
F32A5.2		3054.71		2058.6	4050.81	1.96775	0.976548	8.18364e-16	1.06704e-13
F23H12.9		1313.41		558.549	2068.26	3.70292	1.88866	8.26338e-16	1.07106e-13
F09F3.6		457.802		271.485	644.12	2.37258	1.24646	9.85398e-16	1.26971e-13
C10G8.5		3881.46		2588.83	5174.09	1.99862	0.999008	1.11378e-15	1.42675e-13
ZK1290.6		160.573		70.6563	250.489	3.54518	1.82586	1.39584e-15	1.77766e-13
Y119D3B.8		147.516		62.5871	232.444	3.71393	1.89295	1.4185e-15	1.79608e-13
B0393.4		107.062		33.6812	180.442	5.35735	2.42152	1.48569e-15	1.87035e-13
C15H11.1		261.865		127.712	396.017	3.10087	1.63267	1.74956e-15	2.18963e-13
K09H9.8		264.03		136.86	391.201	2.85841	1.51522	1.7593e-15	2.18963e-13
F21D5.3		1185.68		782.637	1588.72	2.02996	1.02145	1.8174e-15	2.24916e-13
C12D8.16		51.6739		6.4762	96.8716	14.9581	3.90285	2.07119e-15	2.54885e-13
F10C1.9		707.749		452.01	963.488	2.13156	1.09191	2.34436e-15	2.85295e-13
Y102A11A.3		2792.92		1940.01	3645.83	1.87929	0.910184	2.33954e-15	2.85295e-13
F56F3.4		298.382		154.943	441.82	2.8515	1.51172	2.6668e-15	3.22742e-13
F55F8.7		202.202		97.8874	306.517	3.13132	1.64677	2.78396e-15	3.35069e-13
F09F7.8		35.9212		1.58942	70.253	44.2004	5.46599	3.06533e-15	3.64924e-13
C05C12.5		399.399		217.593	581.204	2.67106	1.41741	3.06452e-15	3.64924e-13
Y7A9C.1		166.755		75.5099	257.999	3.41676	1.77263	3.1869e-15	3.77346e-13
T25B2.2		504.417		305.577	703.257	2.3014	1.20251	3.52511e-15	4.15148e-13
R02E4.3		58.9217		11.6297	106.214	9.133	3.19109	4.05879e-15	4.75443e-13
C09B9.4		313.948		170.959	456.937	2.67278	1.41834	4.10116e-15	4.77851e-13
C49A9.3		219.603		110.781	328.425	2.96464	1.56786	4.24186e-15	4.91629e-13
K08A2.2		172.311		79.7519	264.87	3.32118	1.7317	4.57692e-15	5.27671e-13
C55C3.7		42.52		79.8372	5.20268	0.0651661	-3.93973	5.32714e-15	6.10948e-13
F58G4.1		2721.18		1766.26	3676.11	2.0813	1.05749	6.14733e-15	7.01339e-13
C01G12.10		32.9372		0.529806	65.3445	123.337	6.94646	6.30583e-15	7.15695e-13
T26C5.4		164.905		73.9205	255.89	3.46169	1.79148	6.80645e-15	7.68532e-13
Y97E10C.1		775.519		500.226	1050.81	2.10067	1.07085	6.97479e-15	7.83502e-13
F26A1.3		180.795		85.0535	276.536	3.25132	1.70103	7.81917e-15	8.73872e-13
C54G6.5		2642.19		4064.94	1219.44	0.299989	-1.73702	8.39049e-15	9.32963e-13
F38B7.1		2197.77		1531.66	2863.87	1.86978	0.902867	9.83159e-15	1.08768e-12
Y39B6A.25		108.586		38.3902	178.782	4.65698	2.21939	1.05704e-14	1.16354e-12
Y73F8A.20		194.556		96.535	292.577	3.03079	1.59969	1.16422e-14	1.27511e-12
R07E5.4		154.053		235.866	72.2408	0.306279	-1.70708	1.21727e-14	1.32658e-12
C25A8.5		236.61		88.9992	384.221	4.31713	2.11007	1.22581e-14	1.32928e-12
T08B6.9		156.397		70.5081	242.286	3.43629	1.78085	1.23385e-14	1.33141e-12
Y43C5A.3		481.028		294.734	667.322	2.26415	1.17897	1.45433e-14	1.56162e-12
W09C3.2		141.322		60.4418	222.202	3.6763	1.87826	1.89909e-14	2.02924e-12
F49A5.7		24.2463		0	48.4925	Inf	Inf	1.91836e-14	2.03988e-12
K02F6.3		520.421		313.828	727.014	2.3166	1.21201	1.94415e-14	2.05733e-12
C05D9.9		520.128		319.549	720.706	2.25538	1.17337	2.31437e-14	2.43732e-12
F54D5.12		6736.82		8626.08	4847.57	0.561966	-0.831444	2.33464e-14	2.4469e-12
C54D10.10		92.9135		30.4988	155.328	5.09292	2.34849	2.35634e-14	2.45789e-12
D1086.18		110.841		42.362	179.32	4.23304	2.0817	2.43157e-14	2.52434e-12
Y47D7A.13		451.92		50.0235	853.816	17.0683	4.09325	3.00384e-14	3.10373e-12
K08F4.5		248.383		122.795	373.971	3.04548	1.60667	3.19392e-14	3.28464e-12
C36H8.3		706.741		459.009	954.474	2.07942	1.05618	3.48851e-14	3.57083e-12
ZK524.1		223.315		105.631	340.998	3.22822	1.69074	3.63236e-14	3.70078e-12
F38E9.1		1014.41		683.831	1344.99	1.96685	0.975884	3.90925e-14	3.96445e-12
F07G6.10		366.414		204.255	528.572	2.5878	1.37173	3.93482e-14	3.97199e-12
ZK1128.7		376.031		224.881	527.181	2.34427	1.22914	4.44486e-14	4.46627e-12
C05B5.2		624.648		298.171	951.124	3.18986	1.67349	4.5776e-14	4.57864e-12
C24G7.2		64.7253		14.5418	114.909	7.90194	2.98221	4.82048e-14	4.79792e-12
Y15E3A.4		1122.12		692.566	1551.68	2.24048	1.16381	4.84063e-14	4.79792e-12
R11G11.14		174.783		38.5313	311.035	8.07227	3.01297	5.21733e-14	5.148e-12
Y75B8A.3		435.014		245.277	624.751	2.54713	1.34887	5.28041e-14	5.18688e-12
F55G11.4		1048.49		241.538	1855.44	7.68176	2.94144	5.33222e-14	5.21439e-12
R04E5.10		433.679		265.713	601.645	2.26427	1.17905	6.31467e-14	6.14768e-12
C49G7.3		1247.74		851.808	1643.67	1.92962	0.948317	6.83611e-14	6.62588e-12
Y71G12B.17		165.205		78.8404	251.569	3.19087	1.67395	6.94053e-14	6.69745e-12
C14F11.4		1761.44		1231.89	2290.99	1.85973	0.895096	7.04049e-14	6.76412e-12
T25G12.7		464.937		287.527	642.346	2.23404	1.15965	7.32028e-14	6.98969e-12
F54D1.6		1690.61		1154.14	2227.08	1.92965	0.948337	7.3391e-14	6.98969e-12
AH10.1		495.653		239.174	752.132	3.14471	1.65293	8.03049e-14	7.61506e-12
F32B5.8		8807.82		11240.9	6374.69	0.567095	-0.818338	9.5398e-14	9.0073e-12
D1046.5		742.608		492.983	992.233	2.01271	1.00914	1.05948e-13	9.96045e-12
F46G10.6		1485.42		1947.68	1023.16	0.525323	-0.928724	1.06784e-13	9.99614e-12
C25H3.10		278.935		159.356	398.514	2.50078	1.32238	1.07687e-13	1.00378e-11
Y95B8A.4		142.819		58.6746	226.964	3.86818	1.95166	1.21521e-13	1.12793e-11
E03H4.10		37.94		5.9464	69.9336	11.7607	3.5559	1.32773e-13	1.22717e-11
C53B7.3		1980.13		1407.7	2552.55	1.81328	0.858599	1.36174e-13	1.25332e-11
T28C12.3		143.788		64.1208	223.455	3.4849	1.80112	1.61962e-13	1.48442e-11
C40H1.8		95.9675		40.1243	151.811	3.78352	1.91973	1.69307e-13	1.54528e-11
F01D4.3		66.6728		17.4872	115.858	6.62534	2.72799	1.8591e-13	1.68978e-11
F52B11.4		1033.22		412.13	1654.3	4.01403	2.00505	1.88695e-13	1.708e-11
T21C12.1		590.404		383.414	797.393	2.07972	1.05639	2.04037e-13	1.83927e-11
Y22D7AR.12		153.181		60.4122	245.951	4.07121	2.02546	2.09707e-13	1.87812e-11
C16C8.18		172.649		71.7159	273.582	3.8148	1.93161	2.10061e-13	1.87812e-11
F52H3.7		15307.6		11199	19416.2	1.73375	0.793898	2.11993e-13	1.88769e-11
ZC581.2		140.944		63.9727	217.916	3.40639	1.76824	2.14379e-13	1.89877e-11
T07A5.1		229.344		121.232	337.456	2.78355	1.47693	2.14972e-13	1.89877e-11
K07H8.5		87.0869		30.0283	144.145	4.80032	2.26313	2.18426e-13	1.92153e-11
C50B6.4		321.329		25.5563	617.102	24.1467	4.59376	2.22841e-13	1.94722e-11
F38B2.1		2855.28		2042.98	3667.58	1.7952	0.844148	2.23123e-13	1.94722e-11
M163.1		572.172		371.047	773.296	2.08409	1.05942	2.40886e-13	2.09389e-11
ZK354.6		217.291		99.4507	335.132	3.36983	1.75267	2.50641e-13	2.17007e-11
C34C12.7		400.324		243.435	557.212	2.28896	1.19469	2.5751e-13	2.21206e-11
F38A3.2		652.068		257.813	1046.32	4.05846	2.02093	2.56948e-13	2.21206e-11
R155.2		511.093		284.892	737.293	2.58797	1.37182	2.59777e-13	2.22282e-11
C52E4.7		212.284		97.5354	327.034	3.35297	1.74544	2.89009e-13	2.45474e-11
B0019.1		699.625		460.309	938.941	2.0398	1.02843	2.89123e-13	2.45474e-11
C26F1.1		67.4211		19.0173	115.825	6.09049	2.60656	3.15619e-13	2.66936e-11
Y66D12A.11		139.924		64.6802	215.167	3.32663	1.73406	3.26305e-13	2.74912e-11
F47C12.4		512.825		297.052	728.598	2.45276	1.29441	3.51107e-13	2.94675e-11
R155.3		245.806		103.159	388.453	3.76556	1.91287	3.5831e-13	2.99572e-11
B0024.2		216.239		112.781	319.696	2.83466	1.50317	3.69079e-13	3.07402e-11
F17A9.5		1048.53		719.924	1377.13	1.91288	0.935749	3.74357e-13	3.10617e-11
F23A7.4		484.537		705.675	263.399	0.373259	-1.42175	3.79516e-13	3.13709e-11
C50F4.1		1234.24		858.199	1610.29	1.87636	0.907936	3.89841e-13	3.21032e-11
Y47G6A.13		181.715		91.941	271.489	2.95286	1.56212	4.09726e-13	3.36144e-11
ZK858.8		281.851		161.712	401.989	2.48584	1.31373	4.14871e-13	3.39095e-11
T04D3.5		1461.57		1887.04	1036.09	0.549058	-0.864969	4.37908e-13	3.56594e-11
T01B11.2		1467.82		1027.06	1908.58	1.85828	0.893971	4.43135e-13	3.59514e-11
F46A9.1		161.61		62.4721	260.748	4.17382	2.06137	4.47939e-13	3.6207e-11
C05B5.6		72.9994		21.9034	124.095	5.66557	2.50222	4.5137e-13	3.63502e-11
D1005.1		5368.32		6808.7	3927.95	0.576901	-0.793604	4.53276e-13	3.637e-11
H43E16.1		486.812		259.763	713.86	2.74812	1.45845	4.64117e-13	3.71039e-11
K07B1.8		1230.59		851.045	1610.13	1.89195	0.919874	4.8183e-13	3.83799e-11
F27E5.3		88.7329		30.2357	147.23	4.86941	2.28375	4.99036e-13	3.96064e-11
C36B1.10		457.925		197.898	717.953	3.6279	1.85914	5.04409e-13	3.98883e-11
C52D10.1		74.1251		121.762	26.4883	0.217542	-2.20064	5.14189e-13	4.05155e-11
K08E3.1		835.09		564.422	1105.76	1.9591	0.970192	5.43537e-13	4.26745e-11
Y119D3B.21		2381.03		3053.14	1708.91	0.559721	-0.83722	5.47195e-13	4.28083e-11
T03F7.1		264.854		153.439	376.27	2.45225	1.2941	6.96676e-13	5.41159e-11
C54D10.3		1284.28		829.56	1739	2.09629	1.06784	6.96182e-13	5.41159e-11
T06C10.6		112.01		46.6633	177.358	3.8008	1.9263	7.11768e-13	5.50929e-11
C50F4.10		177.508		90.2923	264.723	2.93185	1.55181	7.80907e-13	6.02316e-11
Y59H11AR.2		2608.81		1876.21	3341.41	1.78094	0.832635	8.07595e-13	6.20715e-11
K01B6.1		350.988		160.082	541.894	3.3851	1.7592	8.35493e-13	6.39912e-11
F08G2.6		145.768		52.8171	238.718	4.51972	2.17623	8.43229e-13	6.41352e-11
T07E3.6		863.906		588.87	1138.94	1.93412	0.951674	8.42817e-13	6.41352e-11
F36H5.2		409.516		252.764	566.269	2.24031	1.1637	8.4806e-13	6.42794e-11
T28H10.2		264.715		150.345	379.086	2.52143	1.33424	9.20345e-13	6.95178e-11
C34C6.7		188.801		101.385	276.217	2.72444	1.44596	9.69363e-13	7.29687e-11
W07A12.7		591.89		789.665	394.114	0.49909	-1.00263	1.10865e-12	8.31674e-11
C28D4.5		257.761		142.58	372.942	2.61567	1.38718	1.1211e-12	8.38146e-11
ZK1251.2		142.89		68.3557	217.424	3.18078	1.66938	1.17628e-12	8.76405e-11
H06H21.10		662.446		442.151	882.741	1.99647	0.997451	1.18387e-12	8.79073e-11
T19H12.1		144.042		218.29	69.795	0.319735	-1.64505	1.20297e-12	8.90238e-11
C37A2.2		8724.56		11076.8	6372.28	0.57528	-0.797663	1.22846e-12	9.0604e-11
F44G4.5		169.515		84.3755	254.654	3.0181	1.59364	1.32642e-12	9.75009e-11
W02A2.3		345.115		191.181	499.05	2.61036	1.38425	1.37658e-12	1.0085e-10
H02I12.1		78449.3		97621.8	59276.7	0.607208	-0.719738	1.38572e-12	1.01181e-10
F58A6.5		229.98		87.8211	372.139	4.23747	2.0832	1.40503e-12	1.0225e-10
H04J21.1		129.306		58.1448	200.467	3.44772	1.78564	1.42923e-12	1.03667e-10
T03F6.4		94.5782		33.5592	155.597	4.63651	2.21304	1.43455e-12	1.03709e-10
Y116A8C.4		113.263		48.5454	177.98	3.66625	1.8743	1.51437e-12	1.08983e-10
ZK930.4		165.456		79.4888	251.422	3.16299	1.66129	1.51745e-12	1.08983e-10
C05C10.3		7369.38		9278	5460.77	0.588572	-0.76471	1.54026e-12	1.1026e-10
F57G4.8		134.743		212.403	57.0824	0.268746	-1.89568	1.55811e-12	1.11174e-10
F46G10.2		455.854		294.741	616.968	2.09326	1.06575	1.56614e-12	1.11384e-10
F48C1.7		521.146		288.042	754.25	2.61855	1.38877	1.64477e-12	1.16598e-10
Y54F10BM.3		367.562		225.773	509.35	2.25602	1.17378	1.68871e-12	1.19326e-10
K05G3.3		2012.62		1448.92	2576.32	1.77809	0.830329	1.6996e-12	1.1971e-10
T27A3.5		242.793		111.581	374.005	3.35188	1.74497	1.72744e-12	1.21281e-10
R03D7.8		133.741		61.3533	206.128	3.35969	1.74833	1.75493e-12	1.22037e-10
T01B11.4		235.698		100.244	371.151	3.70249	1.8885	1.74943e-12	1.22037e-10
F20H11.4		284.477		167.128	401.825	2.40429	1.26561	1.74654e-12	1.22037e-10
Y105E8A.27		217.518		113.403	321.633	2.83619	1.50395	1.77886e-12	1.2331e-10
K03E5.2		980.097		679.007	1281.19	1.88686	0.915984	1.79639e-12	1.24132e-10
T08B6.4		1218.53		668.739	1768.32	2.64427	1.40287	1.84436e-12	1.27046e-10
R06F6.6		196.249		107.569	284.929	2.64881	1.40535	1.88002e-12	1.29097e-10
K09C4.5		97.7466		150.812	44.6809	0.296268	-1.75503	1.88717e-12	1.29183e-10
F08D12.2		106.692		39.035	174.349	4.46647	2.15914	1.92217e-12	1.31169e-10
Y41D4B.17		77.918		15.3383	140.498	9.15992	3.19533	1.94412e-12	1.32255e-10
K01H12.2		363.644		157.888	569.4	3.60635	1.85054	1.97778e-12	1.34128e-10
T07H6.3		531.781		347.858	715.705	2.05747	1.04087	2.05625e-12	1.39019e-10
F10F2.7		285.607		135.866	435.349	3.20424	1.67998	2.28887e-12	1.5427e-10
Y105E8A.4		1514.21		2128.59	899.829	0.422735	-1.24217	2.34771e-12	1.5775e-10
T22H9.3		192.244		84.3163	300.171	3.56006	1.8319	2.37542e-12	1.59124e-10
Y18H1A.10		204.011		90.8221	317.2	3.49254	1.80428	2.49804e-12	1.66828e-10
AH6.3		126.726		57.289	196.164	3.42411	1.77573	2.59083e-12	1.72499e-10
R09E10.3		667.074		344.63	989.518	2.87125	1.52168	2.70498e-12	1.79553e-10
W06B3.2		866.017		601.237	1130.8	1.88079	0.911336	2.75882e-12	1.82574e-10
F41G3.10		842.278		542.621	1141.93	2.10448	1.07346	2.98551e-12	1.96981e-10
T10H9.8		320.115		173.683	466.548	2.6862	1.42557	2.99621e-12	1.97093e-10
F48G7.5		43.7926		1.61905	85.9661	53.0966	5.73055	3.08003e-12	2.02e-10
ZK1053.2		379.891		185.916	573.867	3.0867	1.62607	3.19455e-12	2.08886e-10
T06A4.2		102.455		42.3656	162.544	3.8367	1.93987	3.47552e-12	2.26581e-10
B0207.1		104.127		42.8065	165.448	3.86502	1.95048	3.62767e-12	2.35799e-10
K05F1.10		237.574		138.071	337.078	2.44134	1.28767	3.69036e-12	2.39164e-10
B0212.3		295.272		408.693	181.85	0.444955	-1.16827	3.76693e-12	2.43406e-10
R06A4.8		3033.91		3825.91	2241.92	0.585982	-0.771072	3.9012e-12	2.5134e-10
F28F8.2		1103.48		2097.2	109.773	0.0523429	-4.25586	4.06238e-12	2.60958e-10
T22H6.2		586.634		824.221	349.046	0.423486	-1.23961	4.13981e-12	2.65154e-10
D1081.12		139.772		67.9184	211.625	3.11587	1.63964	4.28169e-12	2.73441e-10
F40G12.10		353.992		163.716	544.269	3.32447	1.73312	4.4682e-12	2.84523e-10
Y106G6D.3		750.689		479.752	1021.63	2.12949	1.0905	5.0531e-12	3.20835e-10
K10D2.8		107.652		44.9553	170.348	3.78927	1.92192	5.27442e-12	3.33919e-10
R09A1.1		9535.57		11875.6	7195.5	0.605904	-0.722839	5.30104e-12	3.34638e-10
C18H2.5		222.211		107.987	336.435	3.11551	1.63947	5.73487e-12	3.60984e-10
R06C7.3		716.182		488.33	944.035	1.93319	0.950984	5.82743e-12	3.65759e-10
Y54E2A.9		95.0206		38.8608	151.18	3.89031	1.95988	6.6707e-12	4.17491e-10
Y38H6C.23		254.6		141.895	367.306	2.58859	1.37216	6.80537e-12	4.24705e-10
H08M01.1		113.081		50.3423	175.82	3.49248	1.80425	6.8837e-12	4.27386e-10
C36A4.9		14859.7		18498.3	11221	0.606594	-0.721198	6.88735e-12	4.27386e-10
C50F7.5		694.809		323.165	1066.45	3.30002	1.72248	6.93274e-12	4.28988e-10
F36D3.5		191.858		103.482	280.235	2.70806	1.43726	7.64758e-12	4.70563e-10
F41D9.2		317.743		194.59	440.896	2.26577	1.18	7.63331e-12	4.70563e-10
T16G1.4		116.016		54.1659	177.866	3.28373	1.71534	8.36382e-12	5.13192e-10
F52F12.5		382.739		242.731	522.748	2.15361	1.10676	8.5923e-12	5.25738e-10
ZC581.6		112.219		49.3716	175.067	3.54591	1.82616	8.98343e-12	5.48139e-10
M05B5.3		105.341		31.1472	179.535	5.76407	2.52709	9.20658e-12	5.60195e-10
T24F1.5		143.408		71.6234	215.193	3.0045	1.58713	9.6788e-12	5.87297e-10
T22F3.3		29359.3		36413.9	22304.8	0.612535	-0.707137	9.88169e-12	5.97951e-10
F53B2.5		171.868		69.8337	273.901	3.9222	1.97166	9.98057e-12	6.02271e-10
ZK1320.9		3809.32		4784.9	2833.73	0.592224	-0.755786	1.08184e-11	6.51037e-10
F58D5.6		73.8329		25.2304	122.435	4.85269	2.27878	1.0921e-11	6.55411e-10
C48E7.1		1804		1314.15	2293.85	1.74549	0.803633	1.15578e-11	6.91731e-10
Y113G7B.23		3826.59		4787.69	2865.49	0.598512	-0.740547	1.24731e-11	7.44475e-10
K06A5.2		1337.73		754.667	1920.79	2.54522	1.34779	1.25155e-11	7.44978e-10
C08F11.10		284.016		167.573	400.459	2.38976	1.25687	1.36126e-11	8.08087e-10
Y45G12C.2		387.727		617.82	157.635	0.255148	-1.97059	1.51192e-11	8.95098e-10
T28C6.5		126.84		53.3765	200.303	3.75265	1.90791	1.53333e-11	9.05328e-10
C09D4.3		371.763		201.636	541.89	2.68747	1.42625	1.54e-11	9.06818e-10
F44E2.2		10760.6		13361.8	8159.38	0.610652	-0.711578	1.54537e-11	9.07542e-10
B0218.5		95.991		38.7719	153.21	3.95158	1.98243	1.6266e-11	9.52693e-10
T04B2.2		261.811		147.759	375.862	2.54375	1.34696	1.65331e-11	9.65754e-10
R08C7.6		156.373		72.3346	240.412	3.32361	1.73275	1.67536e-11	9.7603e-10
F07A11.2		12716.8		15768.4	9665.2	0.612947	-0.706165	1.69558e-11	9.85189e-10
M04G12.1		803.132		560.832	1045.43	1.86408	0.89846	1.76957e-11	1.02546e-09
F02H6.5		147.204		227.215	67.1936	0.295727	-1.75766	1.7762e-11	1.02659e-09
Y46C8AL.3		108.702		194.13	23.2734	0.119886	-3.06027	1.84191e-11	1.06177e-09
F02C9.4		139.871		69.6559	210.087	3.01606	1.59267	1.85213e-11	1.06485e-09
Y48G10A.4		1864.54		2349.03	1380.06	0.587502	-0.767334	1.89203e-11	1.08494e-09
F57B9.2		31243.2		39338.7	23147.7	0.588421	-0.76508	1.90917e-11	1.09191e-09
F26E4.8		17985.9		22270.6	13701.1	0.61521	-0.700849	1.92004e-11	1.09527e-09
F54C1.9		153.169		77.8697	228.468	2.93398	1.55286	1.9507e-11	1.107e-09
K09E3.7		327.369		447.202	207.536	0.464076	-1.10757	1.948e-11	1.107e-09
F58G1.4		5106.98		3844.49	6369.48	1.65678	0.728383	1.98585e-11	1.12403e-09
R06B10.2		152.695		69.0669	236.323	3.42165	1.77469	2.01984e-11	1.14032e-09
Y54G2A.46		220.539		125.971	315.107	2.50143	1.32275	2.07011e-11	1.1657e-09
T04F3.3		215.395		121.647	309.144	2.54132	1.34558	2.11261e-11	1.18658e-09
Y62H9A.6		9446.06		11792.2	7099.88	0.602081	-0.731971	2.25218e-11	1.26174e-09
B0511.3		82.2416		30.5877	133.896	4.37743	2.13008	2.32957e-11	1.30177e-09
T16H12.6		381.633		190.773	572.493	3.00091	1.5854	2.41653e-11	1.34692e-09
D1086.7		2162.18		1595.18	2729.19	1.7109	0.774754	2.62136e-11	1.45738e-09
C08D8.2		489.303		326.414	652.193	1.99805	0.998595	2.64173e-11	1.46499e-09
Y50E8A.3		355.03		226.063	483.997	2.14098	1.09827	2.68751e-11	1.48662e-09
Y47D7A.15		87.5416		12.8671	162.216	12.6071	3.65616	2.72292e-11	1.50241e-09
T12B5.8		158.051		80.4263	235.676	2.93033	1.55106	2.97168e-11	1.63555e-09
T05A6.1		166.455		88.1695	244.74	2.77579	1.4729	3.0406e-11	1.66928e-09
F44A6.5		548.245		368.039	728.451	1.97928	0.984974	3.20424e-11	1.75472e-09
C33F10.1		1155.95		628.486	1683.41	2.67851	1.42143	3.39341e-11	1.85368e-09
C26F1.10		118.322		55.4329	181.211	3.26902	1.70886	3.44842e-11	1.87905e-09
Y75B8A.27		956.298		681.152	1231.44	1.80788	0.854301	3.54607e-11	1.92746e-09
Y116F11B.8		64.813		21.4329	108.193	5.048	2.33571	3.58811e-11	1.94484e-09
F35B12.4		176.934		95.9981	257.869	2.68619	1.42556	3.5958e-11	1.94484e-09
Y51A2D.13		2115.58		1287.7	2943.46	2.28584	1.19272	3.67378e-11	1.98212e-09
T05C12.1		351.066		170.844	531.287	3.10978	1.63681	3.75162e-11	2.01914e-09
Y49E10.10		308.559		171.519	445.598	2.59796	1.37738	3.78505e-11	2.03215e-09
R10D12.10		94.0959		39.3017	148.89	3.78839	1.92158	3.81499e-11	2.04321e-09
C32D5.4		114.301		53.5508	175.051	3.26887	1.70879	3.87997e-11	2.07294e-09
ZK39.6		250.443		400.842	100.044	0.249586	-2.00239	3.96849e-11	2.11019e-09
F36D3.1		633.419		829.737	437.101	0.526794	-0.924688	3.97858e-11	2.11019e-09
F54C9.3		1320.64		956.365	1684.92	1.7618	0.817048	3.97808e-11	2.11019e-09
Y57A10B.6		41.2098		73.0943	9.32532	0.127579	-2.97053	4.14332e-11	2.19226e-09
W03F8.6		139.798		65.0583	214.537	3.29761	1.72142	4.20121e-11	2.21753e-09
C05E7.2		86.2342		30.1468	142.322	4.72095	2.23908	4.34552e-11	2.28819e-09
F36D3.8		229.475		121.38	337.569	2.78109	1.47565	4.47174e-11	2.349e-09
F54C9.14		106.906		47.4562	166.356	3.50545	1.8096	4.61673e-11	2.41936e-09
F54F3.3		100.398		26.0233	174.773	6.71602	2.74761	4.88792e-11	2.55536e-09
F09A5.9		622.511		384.977	860.044	2.23401	1.15964	5.25965e-11	2.74316e-09
C23G10.6		365.501		195.689	535.313	2.73552	1.45182	5.38325e-11	2.80095e-09
Y75B8A.24		6447.48		7969.53	4925.42	0.618031	-0.694249	5.55011e-11	2.88093e-09
Y1A5A.1		138.267		38.5088	238.025	6.18106	2.62785	5.90439e-11	3.05758e-09
D2005.2		307.143		193.326	420.959	2.17746	1.12264	6.06656e-11	3.13415e-09
C49C3.1		724.373		504.913	943.833	1.8693	0.902498	6.172e-11	3.18112e-09
C14B9.1		1018.51		729.964	1307.06	1.79058	0.840426	6.24833e-11	3.2129e-09
Y113G7A.4		3059.64		2256.41	3862.88	1.71196	0.775648	6.50163e-11	3.33532e-09
C35A5.3		519.553		780.951	258.155	0.330564	-1.597	6.96416e-11	3.56425e-09
B0280.11		233.797		118.409	349.185	2.94898	1.56021	7.17817e-11	3.66522e-09
D1044.3		240.966		143.191	338.742	2.36566	1.24224	7.22141e-11	3.67872e-09
F44F4.11		2507.99		3138.76	1877.23	0.598081	-0.741586	7.2738e-11	3.69681e-09
F59A6.4		391.865		198.075	585.655	2.95673	1.564	7.35562e-11	3.72113e-09
C12C8.3		11561.1		14224.1	8898.08	0.625564	-0.676771	7.34592e-11	3.72113e-09
F33D11.2		116.816		47.6933	185.939	3.89865	1.96297	7.53901e-11	3.80512e-09
Y81G3A.3		1842.61		2305.26	1379.95	0.598607	-0.740319	7.55969e-11	3.80678e-09
Y71G12B.3		137.515		68.4185	206.611	3.01981	1.59446	7.73355e-11	3.8854e-09
F38E1.3		134.475		63.0908	205.859	3.2629	1.70615	7.90341e-11	3.96165e-09
T06C10.3		186.982		103.07	270.893	2.62823	1.39409	8.11162e-11	4.05492e-09
C47E12.8		406.582		268.543	544.622	2.02806	1.0201	8.1265e-11	4.05492e-09
Y32F6A.2		169.387		91.941	246.833	2.68469	1.42476	8.23523e-11	4.09984e-09
F01D5.5		243.937		127.056	360.817	2.83982	1.5058	8.46345e-11	4.2039e-09
F58A4.7		1410.04		1034.22	1785.86	1.72677	0.788076	8.88412e-11	4.40286e-09
Y5H2B.5		51.9568		16.2201	87.6934	5.40645	2.43468	9.57056e-11	4.72169e-09
K03A11.5		165.233		90.4962	239.971	2.65172	1.40693	9.56845e-11	4.72169e-09
ZC581.7		161.393		82.3748	240.412	2.91851	1.54523	9.67622e-11	4.76309e-09
F55G1.4		12464.4		15351.2	9577.51	0.623892	-0.680631	9.70027e-11	4.76422e-09
Y39G10AR.14		7394.63		9118.42	5670.85	0.621912	-0.685218	9.75507e-11	4.78042e-09
F57F4.1		298.146		176.257	420.035	2.38308	1.25283	9.85543e-11	4.81882e-09
ZK858.2		779.706		404.95	1154.46	2.85088	1.5114	1.01081e-10	4.93135e-09
F10G7.2		23333.8		28834.4	17833.2	0.618471	-0.693223	1.02373e-10	4.98328e-09
ZC116.5		75.5899		28.2611	122.919	4.3494	2.12081	1.03047e-10	5.00498e-09
ZK593.3		1505.71		1037.87	1973.55	1.90154	0.927171	1.04743e-10	5.07609e-09
ZK669.3		483.691		306.986	660.396	2.15123	1.10516	1.1069e-10	5.35248e-09
ZK662.2		42.8751		8.77322	76.977	8.77409	3.13325	1.11601e-10	5.38461e-09
K04H4.5		494.643		322.809	666.477	2.06462	1.04588	1.12265e-10	5.40476e-09
R07C3.13		90.1073		32.266	147.949	4.58527	2.19701	1.13082e-10	5.43178e-09
F15G9.1		1960.7		1457.68	2463.73	1.69017	0.757172	1.13322e-10	5.43178e-09
F26F12.3		5136.29		3896.23	6376.34	1.63654	0.71065	1.14002e-10	5.45245e-09
F54H5.5		149.84		60.3825	239.298	3.96304	1.98661	1.14948e-10	5.48571e-09
C15F1.1		487.322		329.389	645.255	1.95894	0.970075	1.1806e-10	5.62199e-09
H32K16.2		113.163		53.6954	172.63	3.21499	1.68481	1.19248e-10	5.66623e-09
C26E1.2		281.267		174.779	387.755	2.21854	1.14961	1.19675e-10	5.67419e-09
ZK795.2		301.362		173.519	429.205	2.47353	1.30657	1.21456e-10	5.74619e-09
C54D10.4		91.4305		40.0982	142.763	3.56033	1.83201	1.29325e-10	6.1053e-09
W02B8.2		1587.21		2280.35	894.067	0.392075	-1.3508	1.29783e-10	6.11374e-09
H01G02.1		559.114		380.598	737.629	1.93808	0.954629	1.34708e-10	6.33215e-09
B0524.2		73.3902		27.8794	118.901	4.26483	2.09249	1.35484e-10	6.35498e-09
F15H9.1		34.0762		5.56475	62.5877	11.2472	3.49149	1.35833e-10	6.35774e-09
W01B6.2		353.649		177.083	530.216	2.99416	1.58215	1.3888e-10	6.47616e-09
Y46G5A.10		368.509		200.221	536.797	2.68103	1.42279	1.38954e-10	6.47616e-09
Y47D3A.30		253.722		124.563	382.88	3.0738	1.62002	1.41759e-10	6.57889e-09
T27E4.4		737.731		478.774	996.688	2.08175	1.0578	1.41588e-10	6.57889e-09
Y54G2A.15		129.16		64.4136	193.907	3.01035	1.58993	1.52598e-10	7.06693e-09
F28F5.3		700.197		488.126	912.268	1.86892	0.902204	1.55433e-10	7.18305e-09
Y47G6A.26		221.838		86.9392	356.737	4.10329	2.03678	1.56343e-10	7.20988e-09
C14C10.1		909.796		527.894	1291.7	2.44689	1.29095	1.62236e-10	7.46593e-09
M04G12.2		1913.77		1418.23	2409.32	1.69882	0.76453	1.74995e-10	8.03622e-09
C28A5.3		897.311		643.069	1151.55	1.79072	0.840536	1.75488e-10	8.04196e-09
C17G10.3		139.499		72.1272	206.872	2.86815	1.52012	1.77524e-10	8.11828e-09
F39B2.3		895.226		1144.57	645.881	0.5643	-0.825467	1.79312e-10	8.183e-09
C34F11.5		627.391		347.779	907.002	2.60798	1.38293	1.80227e-10	8.20761e-09
T21C9.8		91.6358		40.3281	142.944	3.54451	1.82559	1.80889e-10	8.22069e-09
F27C1.1		2446.38		1444.75	3448	2.38657	1.25494	1.85665e-10	8.42028e-09
ZK688.10		182.216		64.3282	300.104	4.6652	2.22194	1.86233e-10	8.42856e-09
F19B6.4		326.801		121.65	531.951	4.37278	2.12855	1.87772e-10	8.48073e-09
K08F9.1		31.0015		5.38696	56.6159	10.5098	3.39367	1.90111e-10	8.56869e-09
B0524.5		83.4163		34.6223	132.21	3.81864	1.93306	1.92108e-10	8.64093e-09
F21G4.2		9350.77		11458.7	7242.89	0.632089	-0.6618	2.00479e-10	8.99896e-09
F09G8.4		183.011		104.186	261.836	2.51317	1.32951	2.03549e-10	9.1181e-09
F58E6.1		694.98		439.403	950.557	2.16329	1.11323	2.13031e-10	9.52337e-09
K06A1.2		61.8119		20.314	103.31	5.08565	2.34643	2.13691e-10	9.53341e-09
H23N18.3		204.763		120.491	289.035	2.3988	1.26231	2.16598e-10	9.64345e-09
Y46C8AL.1		564.603		303.354	825.852	2.72241	1.44488	2.2027e-10	9.78705e-09
ZC376.2		566.327		739.619	393.034	0.5314	-0.91213	2.25532e-10	9.99538e-09
Y43F8A.2		869.269		485.031	1253.51	2.58438	1.36982	2.25871e-10	9.99538e-09
F44D12.8		141.672		73.5424	209.801	2.85279	1.51237	2.28154e-10	1.0076e-08
ZK945.7		647.842		381.546	914.138	2.39588	1.26056	2.39812e-10	1.05696e-08
F58D2.2		606.706		306.566	906.847	2.95808	1.56466	2.41905e-10	1.06404e-08
C17H12.12		917.951		478.607	1357.3	2.83593	1.50382	2.49951e-10	1.09723e-08
C44C10.9		767.284		546.327	988.241	1.80888	0.855099	2.54296e-10	1.11407e-08
Y37F4.8		46.0576		13.0117	79.1035	6.07943	2.60393	2.79697e-10	1.22291e-08
W07B8.3		224.466		135.241	313.691	2.3195	1.21382	2.86622e-10	1.25069e-08
T22B3.2		1057.17		554.72	1559.62	2.81153	1.49136	2.88096e-10	1.25462e-08
F21D12.3		613.992		427.766	800.217	1.87069	0.90357	2.91531e-10	1.26706e-08
T05C12.3		139.653		58.1744	221.131	3.80117	1.92644	2.95144e-10	1.28022e-08
C06A8.6		392.916		203.17	582.663	2.86786	1.51998	3.06031e-10	1.32482e-08
K01C8.3		6209.63		7678.83	4740.42	0.617336	-0.695872	3.13816e-10	1.35584e-08
F08A8.8		79.8536		32.8551	126.852	3.86096	1.94896	3.15844e-10	1.35925e-08
W06D4.2		358.22		192.629	523.811	2.71927	1.44322	3.15714e-10	1.35925e-08
Y25C1A.1		508.875		261.403	756.347	2.89341	1.53277	3.17742e-10	1.36473e-08
ZK829.2		217.557		111.607	323.508	2.89864	1.53538	3.20873e-10	1.37548e-08
C06A1.1		26883.9		33440.2	20327.7	0.607882	-0.718136	3.49597e-10	1.49569e-08
T20B3.16		81.8087		34.0001	129.617	3.81227	1.93065	3.61992e-10	1.54269e-08
C56E6.2		551.846		719.846	383.847	0.533235	-0.907156	3.61581e-10	1.54269e-08
F14H3.4		696.545		896.641	496.449	0.553676	-0.852887	3.64149e-10	1.54887e-08
F21H11.2		7571.46		9561.44	5581.48	0.583749	-0.77658	3.70721e-10	1.57377e-08
E02H1.7		315.658		192.467	438.849	2.28013	1.18912	3.84537e-10	1.62926e-08
BE10.1		194.685		94.2084	295.162	3.13307	1.64758	3.98767e-10	1.68352e-08
T23G5.1		11503.9		14063.7	8944.06	0.635968	-0.652974	3.98879e-10	1.68352e-08
W02B12.7		155.917		81.3449	230.49	2.83349	1.50258	4.17609e-10	1.75918e-08
F26H9.8		144.606		56.4072	232.805	4.12723	2.04517	4.24013e-10	1.78273e-08
Y77E11A.15		33294.2		41123.9	25464.5	0.619213	-0.691493	4.33446e-10	1.81889e-08
F25E2.2		2166.2		2691.47	1640.93	0.609676	-0.713886	4.52078e-10	1.89345e-08
Y40C5A.1		284.444		181.581	387.306	2.13296	1.09286	4.60058e-10	1.9232e-08
T02E1.1		131.834		68.5667	195.101	2.84541	1.50864	4.74068e-10	1.97799e-08
F26D2.10		250.047		102.307	397.787	3.88816	1.95909	4.827e-10	2.01018e-08
F59F3.4		196.193		115.719	276.667	2.39084	1.25752	4.97772e-10	2.06901e-08
T03E6.7		35867.1		43920.9	27813.2	0.633256	-0.659139	5.00097e-10	2.07474e-08
C53B4.5		69969.7		88743.6	51195.8	0.576896	-0.793618	5.02586e-10	2.08112e-08
Y75B7B.1		139.408		73.2757	205.54	2.80502	1.48801	5.03964e-10	2.08289e-08
C49C8.1		112.133		54.2287	170.037	3.13555	1.64872	5.33873e-10	2.20235e-08
D1086.3		371.45		593.854	149.046	0.25098	-1.99435	5.50824e-10	2.26801e-08
Y69E1A.8		114.735		41.0689	188.402	4.58746	2.1977	5.5776e-10	2.29226e-08
E04F6.6		499.734		343.086	656.383	1.91317	0.935968	5.59338e-10	2.29444e-08
F35E2.9		322.048		159.478	484.619	3.03879	1.6035	5.83703e-10	2.38991e-08
ZC376.8		132.253		67.7998	196.706	2.90128	1.53669	5.99308e-10	2.44922e-08
C26G2.2		915.795		666.236	1165.35	1.74916	0.806664	6.03821e-10	2.45849e-08
F32D1.10		11149.5		13593.2	8705.93	0.640463	-0.642812	6.03698e-10	2.45849e-08
F54F12.1		237.242		108.872	365.612	3.35818	1.74768	6.0518e-10	2.45946e-08
T11F8.3		26725.7		32524.3	20927	0.643426	-0.636155	6.17957e-10	2.50673e-08
H34I24.1		150.372		82.1971	218.546	2.65881	1.41078	6.4019e-10	2.59212e-08
R09B5.8		33.8175		60.1419	7.49304	0.124589	-3.00475	6.59838e-10	2.6594e-08
C02F5.5		493.554		266.701	720.408	2.70118	1.43359	6.59383e-10	2.6594e-08
C09D4.1		773.684		559.601	987.766	1.76512	0.81977	6.60449e-10	2.6594e-08
F53G12.6		176.441		94.4158	258.466	2.73753	1.45287	6.62388e-10	2.66231e-08
K09C6.2		59.5697		14.3083	104.831	7.32658	2.87314	6.69386e-10	2.67851e-08
F56H11.3		78.2564		31.7955	124.717	3.92248	1.97177	6.68956e-10	2.67851e-08
B0454.6		784.013		562.425	1005.6	1.78798	0.838327	6.70085e-10	2.67851e-08
K10C9.7		141.619		70.5674	212.671	3.01373	1.59155	6.75023e-10	2.69333e-08
F42G8.9		156.688		86.0835	227.292	2.64036	1.40074	7.01101e-10	2.79229e-08
C08B6.1		1362.67		1012.19	1713.15	1.69251	0.759162	7.07879e-10	2.81417e-08
ZK328.5		15009.4		18266.1	11752.7	0.643415	-0.636178	7.18611e-10	2.85166e-08
C18H2.4		62.3527		22.4925	102.213	4.54432	2.18406	7.36291e-10	2.91654e-08
T12F5.4		2895.22		3570.18	2220.27	0.621892	-0.685263	7.40559e-10	2.92815e-08
T25B9.4		94.0079		43.3955	144.62	3.33261	1.73665	7.55204e-10	2.98067e-08
B0034.1		165.789		91.615	239.962	2.61924	1.38915	7.74232e-10	3.05028e-08
F08G5.2		149.493		62.7388	236.247	3.76557	1.91287	7.79814e-10	3.06676e-08
F47B8.11		1105.37		482.856	1727.89	3.57847	1.83934	8.02938e-10	3.14768e-08
C14C6.5		2308.51		1290.59	3326.43	2.57745	1.36595	8.03266e-10	3.14768e-08
W05B2.7		262.034		150.408	373.66	2.48431	1.31284	8.07287e-10	3.15594e-08
Y71F9B.3		6565.81		8035.95	5095.67	0.634109	-0.657196	8.08254e-10	3.15594e-08
C08F8.4		91.2794		41.6283	140.931	3.38545	1.75935	8.15396e-10	3.17816e-08
K09G1.2		84.3115		36.0932	132.53	3.67187	1.87652	8.38013e-10	3.26051e-08
ZK550.5		774.554		417.902	1131.21	2.70686	1.43662	8.49453e-10	3.29916e-08
ZK84.2		213.777		128.564	298.99	2.32561	1.21761	8.62398e-10	3.34351e-08
F10G8.1		76.876		31.325	122.427	3.90829	1.96654	8.75159e-10	3.38699e-08
C46E10.1		182.533		101.422	263.643	2.59947	1.37822	9.15576e-10	3.53716e-08
R13A5.11		90.2789		40.0685	140.489	3.50622	1.80992	9.54032e-10	3.67504e-08
C26E6.2		548.216		706.728	389.705	0.551422	-0.85877	9.54622e-10	3.67504e-08
C25H3.8		4046.07		4953.19	3138.95	0.633723	-0.658077	9.75345e-10	3.74824e-08
R07B7.4		139.59		74.7466	204.434	2.73503	1.45156	9.92773e-10	3.80853e-08
C27D8.2		499.546		322.986	676.105	2.09329	1.06577	9.97572e-10	3.82025e-08
C18H7.4		216.139		112.14	320.137	2.8548	1.51339	1.01033e-09	3.86236e-08
F37A8.2		102.148		38.7422	165.553	4.27319	2.09531	1.0282e-09	3.92381e-08
C07G2.1		45417.8		55092.8	35742.8	0.648774	-0.624212	1.03975e-09	3.96098e-08
Y23H5A.4		87.1047		36.7712	137.438	3.73766	1.90214	1.09914e-09	4.17999e-08
Y48B6A.5		241.934		109.813	374.055	3.40628	1.7682	1.10528e-09	4.19603e-08
F59A1.9		203.567		294.066	113.068	0.384498	-1.37895	1.1117e-09	4.2131e-08
F34D10.9		220.084		113.255	326.912	2.8865	1.52932	1.12898e-09	4.27123e-08
Y80D3A.7		172.107		99.0916	245.123	2.4737	1.30667	1.14976e-09	4.34231e-08
C18D4.8		95.294		43.8329	146.755	3.34806	1.74333	1.15309e-09	4.34741e-08
Y57G11C.42		118.221		58.4375	178.005	3.04607	1.60695	1.15812e-09	4.35138e-08
F44F1.3		137.358		73.6277	201.089	2.73116	1.44951	1.15781e-09	4.35138e-08
R08A2.1		166.969		91.6779	242.261	2.64252	1.40192	1.16153e-09	4.35673e-08
Y48G1C.5		242.005		150.408	333.602	2.21798	1.14925	1.17352e-09	4.39419e-08
F47F6.5		209.968		96.7981	323.138	3.33827	1.7391	1.17814e-09	4.40396e-08
C50C3.6		23164.8		29220	17109.7	0.585547	-0.772142	1.18822e-09	4.43406e-08
C36H8.2		136.196		72.4792	199.912	2.75821	1.46373	1.19569e-09	4.45434e-08
F53G12.8		196.696		117.642	275.751	2.34398	1.22896	1.20143e-09	4.46814e-08
F36A4.4		113.422		56.4961	170.348	3.01522	1.59226	1.20891e-09	4.48833e-08
ZC395.5		186.223		109.513	262.933	2.40092	1.26359	1.21478e-09	4.50251e-08
B0205.10		709.932		395.061	1024.8	2.59403	1.3752	1.24827e-09	4.61881e-08
F18E2.1		1950.54		1479.31	2421.77	1.63709	0.711136	1.25608e-09	4.63987e-08
C07A9.8		100.063		47.1303	152.996	3.24623	1.69877	1.27434e-09	4.69941e-08
Y38F1A.1		348.906		196.775	501.038	2.54625	1.34837	1.3129e-09	4.82742e-08
H04M03.1		372.14		195.045	549.236	2.81595	1.49362	1.31567e-09	4.82742e-08
D2045.6		4671.58		5706.15	3637	0.637383	-0.649767	1.31347e-09	4.82742e-08
Y105C5B.3		36.2512		8.06562	64.4368	7.98907	2.99803	1.3217e-09	4.84055e-08
ZK6.10		4069.7		2197.83	5941.58	2.70339	1.43477	1.32367e-09	4.84055e-08
B0365.1		10801.5		13132	8471.04	0.645068	-0.632477	1.33184e-09	4.86232e-08
F16B4.4		3040.55		2335.41	3745.7	1.60388	0.681562	1.36118e-09	4.96116e-08
T22G5.5		1824.02		2264.18	1383.85	0.611194	-0.710298	1.3941e-09	5.0727e-08
Y55B1BL.1		553.19		391.305	715.075	1.82741	0.869799	1.43365e-09	5.20796e-08
Y80D3A.8		49.8771		15.8978	83.8565	5.27474	2.3991	1.44041e-09	5.22386e-08
C04G2.5		101.799		43.3955	160.203	3.6917	1.88428	1.44685e-09	5.23854e-08
F58D5.7		332.905		185.797	480.013	2.58353	1.36934	1.45704e-09	5.26676e-08
C54D1.4		577.155		746.807	407.503	0.54566	-0.873925	1.46393e-09	5.28291e-08
T09E11.11		62.8081		24.7859	100.83	4.06805	2.02434	1.49279e-09	5.37822e-08
T05A7.6		881.865		510.673	1253.06	2.45374	1.29498	1.516e-09	5.45285e-08
ZK622.1		149.498		77.3992	221.597	2.86305	1.51755	1.57091e-09	5.64112e-08
Y46G5A.25		60.003		19.9027	100.103	5.02963	2.33045	1.58996e-09	5.70017e-08
Y102A5A.1		10171.8		12354	7989.58	0.646719	-0.628789	1.64085e-09	5.87302e-08
F54C1.8		73.8374		30.295	117.38	3.87456	1.95403	1.67052e-09	5.9625e-08
T04C12.7		283.913		159.078	408.747	2.56947	1.36147	1.6713e-09	5.9625e-08
T22C1.8		457.842		269.584	646.099	2.39665	1.26102	1.68622e-09	6.00597e-08
C50H2.10		25.6385		2.76756	48.5093	17.5279	4.13158	1.74458e-09	6.20238e-08
F32A5.4		1851.14		1409.61	2292.66	1.62645	0.701726	1.74703e-09	6.20238e-08
C06C6.7		127.431		57.5853	197.278	3.42583	1.77645	1.77209e-09	6.28115e-08
D2085.1		3671.84		4506.36	2837.32	0.629626	-0.667432	1.80637e-09	6.39231e-08
T19D12.1		1478.31		956.601	2000.03	2.09077	1.06403	1.83465e-09	6.48195e-08
F22B5.5		260.133		149.967	370.298	2.46919	1.30404	1.87977e-09	6.63067e-08
F07H5.5		17298.5		13371.3	21225.7	1.58741	0.666671	1.91181e-09	6.73282e-08
ZK849.1		41.3652		10.4812	72.2492	6.89325	2.78518	1.92522e-09	6.76916e-08
F07C3.3		54.3005		16.4572	92.1438	5.599	2.48517	1.99516e-09	7.00385e-08
T23F4.2		220.358		135.211	305.504	2.25946	1.17598	2.00112e-09	7.01352e-08
T10E9.9		287.943		155.532	420.354	2.70269	1.43439	2.03338e-09	7.1152e-08
C33F10.11		542.09		239.115	845.066	3.53415	1.82136	2.09274e-09	7.31123e-08
F59C6.2		73.0905		23.5817	122.599	5.19891	2.37821	2.11303e-09	7.37037e-08
K01D12.14		52.1535		19.5175	84.7894	4.34428	2.11912	2.18616e-09	7.61334e-08
B0513.4		2369.65		2919.69	1819.6	0.623215	-0.682198	2.19631e-09	7.63653e-08
C04G2.8		1086.07		546.711	1625.42	2.97309	1.57197	2.22324e-09	7.71792e-08
ZK757.3		1017.72		516.449	1518.98	2.94121	1.55641	2.25071e-09	7.80091e-08
T20B5.2		109.435		55.2883	163.582	2.95871	1.56497	2.29094e-09	7.9153e-08
H05L14.1		595.758		343.541	847.974	2.46833	1.30354	2.29019e-09	7.9153e-08
F11G11.9		137.413		58.2929	216.533	3.71457	1.8932	2.33181e-09	8.04383e-08
ZK616.61		165.086		84.6719	245.501	2.89944	1.53578	2.33797e-09	8.0524e-08
F19C7.7		41.1561		78.3367	3.97555	0.0507496	-4.30046	2.35597e-09	8.10164e-08
T02G5.8		6676.45		8136.61	5216.29	0.641089	-0.641403	2.38564e-09	8.19081e-08
C41G7.6		414.874		215.589	614.16	2.84876	1.51033	2.41581e-09	8.28142e-08
F58D5.1		12144.8		14777.8	9511.87	0.643659	-0.635631	2.5109e-09	8.59395e-08
C28A5.6		541.686		330.878	752.494	2.27423	1.18538	2.52568e-09	8.63104e-08
C38D9.5		53.2711		17.0166	89.5256	5.26107	2.39536	2.56167e-09	8.72679e-08
F13D12.2		2169.51		2678.3	1660.72	0.620065	-0.689509	2.55793e-09	8.72679e-08
C54G4.2		127.442		65.1508	189.734	2.91223	1.54212	2.56744e-09	8.73288e-08
F36A2.12		215.35		131.832	298.868	2.26704	1.18081	2.5938e-09	8.80887e-08
C14C10.5		15143.4		18662	11624.8	0.622913	-0.682898	2.62162e-09	8.88957e-08
W03D8.10		40.9532		10.4515	71.4549	6.83679	2.77332	2.71654e-09	9.19719e-08
T25B9.6		302.27		142.376	462.165	3.24609	1.6987	2.73589e-09	9.24841e-08
T27C4.1		792.648		560.309	1024.99	1.82933	0.871312	2.742e-09	9.25477e-08
W10C8.4		55.608		19.5471	91.6689	4.68963	2.22948	2.83746e-09	9.54754e-08
F52C12.4		2669.58		3274.79	2064.36	0.630381	-0.665704	2.83434e-09	9.54754e-08
B0222.7		148.765		16.1644	281.365	17.4064	4.12155	2.93315e-09	9.8544e-08
C46H11.9		85.4631		31.6473	139.279	4.40097	2.13782	2.9506e-09	9.89784e-08
F33A8.2		302.66		199.035	406.284	2.04127	1.02946	3.06909e-09	1.02796e-07
F46A9.2		176.633		104.452	248.813	2.38207	1.25221	3.08401e-09	1.03138e-07
C52E2.4		60.4166		22.726	98.1071	4.31696	2.11002	3.14641e-09	1.05005e-07
F26F12.7		13844.1		16722.9	10965.3	0.655706	-0.608879	3.14944e-09	1.05005e-07
B0285.9		1053.73		580.549	1526.91	2.63011	1.39513	3.19399e-09	1.06329e-07
D2045.2		5180.02		6295.65	4064.39	0.645587	-0.631317	3.22005e-09	1.07034e-07
Y8A9A.2		387.745		123.755	651.735	5.26631	2.39679	3.2579e-09	1.08128e-07
T16A9.5		816.629		465.836	1167.42	2.50608	1.32543	3.29252e-09	1.09111e-07
T21G5.1		258.921		141.253	376.589	2.66606	1.41471	3.30888e-09	1.09488e-07
T27E4.7		273.1		159.411	386.789	2.42636	1.27879	3.33684e-09	1.10246e-07
C07D8.6		4626.46		5669.89	3583.04	0.631942	-0.662137	3.35868e-09	1.10801e-07
T25C8.3		48.1247		10.4219	85.8274	8.2353	3.04182	3.43274e-09	1.13074e-07
K02F3.11		1797.59		2218.83	1376.34	0.6203	-0.688962	3.43971e-09	1.13133e-07
W10C6.1		6587.6		7982	5193.21	0.650615	-0.620124	3.47579e-09	1.14149e-07
F37E3.3		225.833		121.295	330.37	2.7237	1.44557	3.48696e-09	1.14344e-07
Y47D3A.13		201.184		118.968	283.399	2.38214	1.25226	3.50108e-09	1.14635e-07
Y50E8A.9		72.1385		29.4985	114.778	3.89099	1.96014	3.55399e-09	1.16194e-07
Y57G11A.2		2328.44		1165.32	3491.55	2.99621	1.58314	3.5616e-09	1.16215e-07
Y48G1C.7		3043.09		3761.84	2324.35	0.617876	-0.69461	3.56525e-09	1.16215e-07
F07H5.9		1008.48		751.641	1265.31	1.6834	0.751376	3.64291e-09	1.1857e-07
F39E9.4		136.219		69.0669	203.371	2.94455	1.55805	3.75782e-09	1.22129e-07
F37H8.5		2217.29		2735.66	1698.93	0.621033	-0.687259	3.84727e-09	1.24851e-07
T22A3.4		661.067		410.474	911.659	2.22099	1.1512	3.93967e-09	1.2766e-07
T07D3.7		2231.53		2745.98	1717.08	0.625307	-0.677362	4.06508e-09	1.3153e-07
C34G6.1		5193.24		6317.51	4068.96	0.644076	-0.634697	4.13671e-09	1.3365e-07
R90.2		199.145		120.699	277.591	2.29987	1.20155	4.15904e-09	1.34174e-07
D1022.9		98.9136		47.6933	150.134	3.14791	1.65439	4.19059e-09	1.34992e-07
C42D8.3		521.417		669.645	373.19	0.557295	-0.843487	4.23584e-09	1.3625e-07
F13G11.2		67.0028		27.4978	106.508	3.87333	1.95357	4.25795e-09	1.3676e-07
F42A9.3		105.875		53.0506	158.699	2.99146	1.58085	4.27069e-09	1.36968e-07
K10D2.3		6167.38		7466.2	4868.57	0.652081	-0.616876	4.33138e-09	1.38712e-07
F40F12.3		245.227		99.3618	391.092	3.93604	1.97674	4.39633e-09	1.40586e-07
F13D12.4		23278.1		28117.9	18438.4	0.655756	-0.608769	4.41921e-09	1.41112e-07
W08F4.3		3604.28		4427.17	2781.39	0.628254	-0.670581	4.44418e-09	1.41703e-07
F56D6.13		148.011		84.8461	211.175	2.48892	1.31552	4.4705e-09	1.42332e-07
W02B12.12		829.358		468.719	1190	2.53883	1.34416	4.47693e-09	1.42332e-07
K11C4.1		167.255		70.7452	263.765	3.72838	1.89855	4.53919e-09	1.44103e-07
C18G1.9		125.107		68.4482	181.766	2.65553	1.409	4.63959e-09	1.47077e-07
F21F3.3		165.074		73.809	256.339	3.47301	1.79619	4.66459e-09	1.47415e-07
F42C5.5		198.403		119.38	277.427	2.32391	1.21655	4.67044e-09	1.47415e-07
R06B10.1		283.665		138.604	428.725	3.09316	1.62908	4.66993e-09	1.47415e-07
F36H1.3		175.038		97.1241	252.952	2.60442	1.38096	4.72537e-09	1.48934e-07
C47D12.1		7553.29		10030.5	5076.09	0.506067	-0.982601	4.8084e-09	1.51333e-07
F37D6.2		2082.1		2612.45	1551.75	0.593982	-0.751509	4.8656e-09	1.52914e-07
Y41E3.18		79.9658		35.5338	124.398	3.50084	1.8077	4.91228e-09	1.5416e-07
F39B2.1		3425.59		4163.55	2687.62	0.645513	-0.631483	4.92448e-09	1.54322e-07
F21H12.6		12649.6		15303.1	9996.13	0.65321	-0.614381	5.05712e-09	1.58252e-07
T15B7.5		130.2		64.3579	196.042	3.04612	1.60697	5.10838e-09	1.59582e-07
F42G2.4		160.612		84.3127	236.911	2.80991	1.49052	5.11421e-09	1.59582e-07
Y54E10A.16		801.772		588.188	1015.36	1.72624	0.787635	5.12818e-09	1.59791e-07
C34H4.2		366.333		248.611	484.055	1.94704	0.961283	5.16001e-09	1.60554e-07
F54B3.2		62.3958		24.7302	100.061	4.04611	2.01654	5.18573e-09	1.60897e-07
Y18H1A.15		74.189		31.4731	116.905	3.71444	1.89314	5.18125e-09	1.60897e-07
C04F12.7		1687.14		1028.25	2346.03	2.28158	1.19004	5.2768e-09	1.63491e-07
F31F6.4		229.032		147.841	310.224	2.09836	1.06926	5.28611e-09	1.63548e-07
H05L03.3		794.871		584.476	1005.27	1.71994	0.78236	5.36926e-09	1.65887e-07
F46B6.8		174.022		35.5895	312.455	8.77942	3.13413	5.42305e-09	1.6728e-07
F25G6.9		6982.71		8469.58	5495.84	0.648891	-0.623951	5.42962e-09	1.6728e-07
T02E1.6		310.634		155.506	465.762	2.99514	1.58262	5.44645e-09	1.67327e-07
H14N18.4		622.36		447.298	797.423	1.78276	0.834109	5.44531e-09	1.67327e-07
F56C9.8		383.956		265.387	502.525	1.89356	0.9211	5.59114e-09	1.71532e-07
Y106G6G.4		1097		612.973	1581.02	2.57926	1.36696	5.63035e-09	1.72493e-07
F44A2.3		261.054		169.044	353.064	2.08859	1.06253	5.7186e-09	1.74952e-07
C25B8.6		181.427		109.247	253.608	2.32142	1.21501	5.84052e-09	1.78433e-07
F28B3.8		5275.83		6437.44	4114.22	0.639108	-0.645869	5.94707e-09	1.81435e-07
F55H12.5		365.344		215.122	515.566	2.39662	1.261	5.98709e-09	1.82402e-07
F36G9.13		102.08		36.3006	167.86	4.62416	2.20919	6.03356e-09	1.83563e-07
C25F9.11		28.6524		5.41659	51.8881	9.57949	3.25995	6.10621e-09	1.85515e-07
T02G5.4		462.28		599.081	325.479	0.543297	-0.880188	6.22911e-09	1.88765e-07
T22D1.9		15733.6		18998.4	12468.8	0.656308	-0.607555	6.23039e-09	1.88765e-07
ZC53.1		156.334		218.994	93.6735	0.427745	-1.22518	6.36462e-09	1.92565e-07
Y54G2A.24		63.9364		13.8971	113.976	8.20143	3.03588	6.43289e-09	1.94362e-07
C09B9.7		123.192		53.3765	193.008	3.61597	1.85438	6.52761e-09	1.96952e-07
T02G6.5		285.928		394.474	177.383	0.44967	-1.15306	6.59563e-09	1.98731e-07
F49E12.1		5892.53		7169.71	4615.36	0.64373	-0.635472	6.61492e-09	1.99038e-07
F18A12.4		198.44		122.029	274.851	2.25235	1.17143	6.8279e-09	2.05165e-07
F49A5.5		22.0643		3.26773	40.8608	12.5043	3.64436	6.85341e-09	2.05649e-07
T03F6.8		56.56		17.6057	95.5142	5.42519	2.43967	6.87136e-09	2.05906e-07
C44F1.2		41.8975		6.65399	77.1409	11.5932	3.5352	7.21107e-09	2.1579e-07
Y87G2A.19		287.258		172.864	401.653	2.32352	1.21631	7.30434e-09	2.18283e-07
R08E5.3		1003.61		1542.46	464.758	0.30131	-1.73068	7.46871e-09	2.22891e-07
F53F1.6		353.575		132.729	574.422	4.32778	2.11363	7.51554e-09	2.23983e-07
F01G4.1		10308.5		12414.3	8202.75	0.660752	-0.59782	7.56327e-09	2.251e-07
C35A5.8		9355.52		11285	7426.02	0.658041	-0.60375	7.61383e-09	2.26297e-07
Y49E10.19		11247.5		13658.2	8836.85	0.647	-0.628162	7.64028e-09	2.26775e-07
F40F8.7		1265.59		759.986	1771.19	2.33056	1.22068	7.87691e-09	2.33483e-07
Y57G7A.6		760.608		429.447	1091.77	2.54227	1.34612	7.98789e-09	2.36452e-07
F18C5.4		148.109		84.257	211.961	2.51565	1.33093	8.02531e-09	2.37183e-07
T14D7.2		716.082		506.51	925.653	1.82751	0.86988	8.03424e-09	2.37183e-07
F13H6.1		949.882		708.328	1191.44	1.68204	0.750212	8.2727e-09	2.43894e-07
K08F9.3		43.6143		13.6304	73.5982	5.39958	2.43285	8.29286e-09	2.4416e-07
ZK1098.6		146.381		82.6083	210.154	2.54398	1.34709	8.33762e-09	2.44492e-07
T20F5.5		229.567		140.164	318.969	2.27568	1.1863	8.33723e-09	2.44492e-07
Y38F2AR.2		5264.31		6413.97	4114.65	0.641514	-0.640448	8.32483e-09	2.44492e-07
F53G2.7		2655.92		3233.69	2078.15	0.642655	-0.637884	8.35335e-09	2.44626e-07
Y71H2AM.19		5211.82		6638.91	3784.73	0.570083	-0.810756	8.4233e-09	2.46345e-07
C04F12.3		376.323		237.833	514.813	2.1646	1.1141	8.54226e-09	2.49491e-07
Y39B6A.30		379.737		196.664	562.81	2.86179	1.51692	8.61241e-09	2.50871e-07
F49C12.15		3551.26		2182.41	4920.12	2.25445	1.17277	8.60834e-09	2.50871e-07
F37B4.7		7759.24		9824.67	5693.81	0.579542	-0.787016	8.63257e-09	2.51124e-07
F22D6.1		399.338		275.879	522.798	1.89503	0.92222	8.65308e-09	2.51387e-07
K04A8.1		358.976		244.873	473.079	1.93194	0.950049	8.72625e-09	2.53177e-07
R05H10.1		67.065		9.86246	124.268	12.6001	3.65536	8.8619e-09	2.56772e-07
R06A4.4		6686.17		8100.49	5271.84	0.650806	-0.619701	8.9854e-09	2.60007e-07
C17H12.3		445.267		219.656	670.877	3.05421	1.6108	9.18832e-09	2.65528e-07
C15H7.3		279.417		152.794	406.04	2.65744	1.41003	9.31056e-09	2.68706e-07
ZK688.12		76.9886		35.0929	118.884	3.3877	1.76031	9.34563e-09	2.68769e-07
K11D12.3		919.274		687.566	1150.98	1.674	0.743296	9.32913e-09	2.68769e-07
Y39H10A.7		2133.38		2606.88	1659.88	0.636732	-0.651241	9.34954e-09	2.68769e-07
F44D12.6		99.986		49.3716	150.6	3.05035	1.60897	9.49129e-09	2.72486e-07
Y56A3A.2		2393.05		2919.12	1866.99	0.639572	-0.644822	9.63805e-09	2.76337e-07
T05B4.14		91.4717		40.3613	142.582	3.53264	1.82075	9.92226e-09	2.84114e-07
Y2H9A.3		213.453		30.0615	396.845	13.2011	3.72259	1.01091e-08	2.88966e-07
C10H11.4		476.75		617.999	335.502	0.542884	-0.881284	1.01181e-08	2.88966e-07
ZK354.2		360.587		193.277	527.896	2.73129	1.44958	1.01355e-08	2.89085e-07
Y41E3.11		9936.66		11962.1	7911.19	0.661352	-0.596509	1.0361e-08	2.95133e-07
F09C3.2		286.933		189.258	384.608	2.03218	1.02303	1.05944e-08	3.01391e-07
K08E4.7		87.4692		33.5331	141.405	4.21689	2.07618	1.09037e-08	3.09482e-07
R05G9.3		405.078		523.949	286.206	0.546249	-0.87237	1.09071e-08	3.09482e-07
F07C3.7		459.175		264.371	653.979	2.47372	1.30668	1.09889e-08	3.114e-07
C33F10.8		118.414		63.7392	173.088	2.71557	1.44125	1.11659e-08	3.16007e-07
F08A8.3		519.13		671.697	366.562	0.545725	-0.873753	1.14437e-08	3.23451e-07
W05E10.4		962.866		680	1245.73	1.83196	0.873386	1.16673e-08	3.29345e-07
F11C7.3		243.529		159.411	327.647	2.05536	1.03939	1.16992e-08	3.2982e-07
M04C3.2		130.596		71.3899	189.801	2.65866	1.4107	1.17268e-08	3.30174e-07
F02G3.1		771.192		499.775	1042.61	2.08616	1.06085	1.20909e-08	3.39988e-07
C31B8.8		729.018		534.408	923.628	1.72832	0.78937	1.24117e-08	3.47156e-07
C46H11.11		780.369		577.296	983.442	1.70353	0.768528	1.23859e-08	3.47156e-07
K07E1.1		1123.22		795.974	1450.46	1.82225	0.865721	1.2364e-08	3.47156e-07
EEED8.5		6064.47		7318.36	4810.57	0.657329	-0.605313	1.2425e-08	3.47156e-07
R119.4		24095.6		29252.7	18938.5	0.647409	-0.62725	1.24053e-08	3.47156e-07
R07B1.8		81.7036		37.0047	126.402	3.41585	1.77225	1.25751e-08	3.509e-07
F39G3.5		144.032		84.5794	203.485	2.40584	1.26654	1.26564e-08	3.52272e-07
Y37E11B.4		1439.12		1768.3	1109.93	0.627682	-0.671894	1.26498e-08	3.52272e-07
C08F1.4		357.784		245.788	469.78	1.91132	0.934572	1.27969e-08	3.54832e-07
C18H9.6		616.531		437.484	795.578	1.81853	0.862773	1.27666e-08	3.54832e-07
T21C9.3		4621.66		3616.36	5626.95	1.55597	0.637814	1.27838e-08	3.54832e-07
F44G3.7		279.891		145.555	414.227	2.84585	1.50886	1.28258e-08	3.55182e-07
C17E7.1		119.644		66.355	172.932	2.60617	1.38193	1.29145e-08	3.57187e-07
ZK858.1		9935.37		11983.6	7887.11	0.658156	-0.603498	1.29508e-08	3.5774e-07
F56B6.4		2188.72		1691.42	2686.02	1.58803	0.667237	1.31958e-08	3.64048e-07
F18E9.3		591.504		429.451	753.557	1.7547	0.811221	1.32565e-08	3.65262e-07
C30C11.4		20764.7		26159.1	15370.3	0.587571	-0.767165	1.34041e-08	3.68866e-07
R07C12.2		313.576		153.135	474.016	3.0954	1.63013	1.37361e-08	3.77526e-07
C03G5.7		256.44		167.155	345.726	2.0683	1.04845	1.38966e-08	3.81459e-07
F07A5.2		1379.58		777.967	1981.2	2.54664	1.34859	1.41597e-08	3.88195e-07
R08A2.2		101.286		47.8414	154.731	3.23426	1.69344	1.41965e-08	3.88717e-07
F40F12.7		347.293		238.834	455.752	1.90824	0.932242	1.43372e-08	3.92079e-07
C01B12.4		62.6954		24.9934	100.397	4.01697	2.00611	1.45189e-08	3.96554e-07
C26C6.1		8430.22		10616.5	6243.95	0.588137	-0.765776	1.46083e-08	3.985e-07
Y116F11B.7		68.4428		29.617	107.269	3.62186	1.85673	1.46554e-08	3.99285e-07
T11F8.4		121.108		62.4129	179.804	2.88087	1.52651	1.4846e-08	4.03978e-07
T16G12.7		113.151		59.4972	166.805	2.80358	1.48727	1.49698e-08	4.0684e-07
C35E7.9		230.679		95.5347	365.823	3.82921	1.93705	1.49941e-08	4.06996e-07
F43B10.2		374.639		260.003	489.275	1.8818	0.912115	1.51891e-08	4.11514e-07
C49H3.5		4983.02		6014.06	3951.97	0.657122	-0.605766	1.51981e-08	4.11514e-07
T13F2.9		1002.96		427.124	1578.79	3.69633	1.8861	1.52357e-08	4.12022e-07
F42G4.6		48.6149		17.0463	80.1835	4.70388	2.23385	1.54246e-08	4.16104e-07
Y70C5A.3		342.39		109.925	574.854	5.22953	2.38668	1.54164e-08	4.16104e-07
T08E11.2		95.342		48.8121	141.872	2.90649	1.53928	1.55801e-08	4.1978e-07
K08B5.1		69.607		29.6466	109.567	3.69577	1.88588	1.58698e-08	4.27062e-07
D2023.1		238.606		131.413	345.798	2.63137	1.39582	1.59882e-08	4.29718e-07
Y65B4BL.5		16283.2		19594.8	12971.5	0.661986	-0.595127	1.60135e-08	4.29872e-07
ZK792.4		111.507		58.671	164.343	2.80109	1.48599	1.63145e-08	4.37417e-07
ZC513.3		54.7936		19.284	90.3031	4.6828	2.22737	1.64704e-08	4.39662e-07
F35E2.5		57.4876		21.7849	93.1902	4.27775	2.09685	1.64544e-08	4.39662e-07
T25E12.6		137.683		194.675	80.692	0.414496	-1.27057	1.64622e-08	4.39662e-07
ZK632.1		10203.6		12252.4	8154.75	0.665561	-0.587357	1.64786e-08	4.39662e-07
T21B6.3		1834.71		1410.61	2258.81	1.60131	0.67925	1.6713e-08	4.45375e-07
F58F6.4		1799.48		2201.66	1397.3	0.634657	-0.655951	1.67991e-08	4.47126e-07
M199.4		50.8768		79.3963	22.3573	0.281591	-1.82833	1.68963e-08	4.49167e-07
C05C12.1		131.657		68.0665	195.248	2.86848	1.52029	1.7099e-08	4.54003e-07
C33G8.3		75.4917		115.93	35.053	0.302362	-1.72565	1.73663e-08	4.60488e-07
T10E9.4		1848.54		1099.93	2597.14	2.3612	1.23952	1.73852e-08	4.60488e-07
H01M10.3		478.23		615.208	341.251	0.554691	-0.850244	1.76123e-08	4.65938e-07
Y55B1AR.4		140.564		78.518	202.61	2.58043	1.36761	1.7676e-08	4.67061e-07
T22C8.6		141.288		80.1039	202.472	2.52761	1.33778	1.78486e-08	4.71052e-07
W05F2.3		8525.04		10253.2	6796.84	0.662898	-0.593142	1.79393e-08	4.72876e-07
C37C3.8		733.066		542.752	923.38	1.70129	0.766631	1.81575e-08	4.77723e-07
F32H2.7		896.132		543.495	1248.77	2.29767	1.20017	1.81668e-08	4.77723e-07
R03G8.4		69.8985		112.107	27.6902	0.246998	-2.01743	1.82219e-08	4.78598e-07
C37A2.5		1733.74		2125.09	1342.38	0.631682	-0.662731	1.8331e-08	4.80888e-07
C05D2.3		214.387		101.396	327.378	3.22872	1.69096	1.89719e-08	4.97105e-07
R11G11.7		180.412		91.8485	268.976	2.92848	1.55015	1.95353e-08	5.11257e-07
C04G6.1		281.801		186.642	376.959	2.01969	1.01413	1.9669e-08	5.14141e-07
M02H5.1		80.1725		41.1246	119.22	2.89901	1.53556	2.01368e-08	5.25463e-07
Y54E2A.4		4784.84		5785.83	3783.84	0.653984	-0.612672	2.01501e-08	5.25463e-07
T10B5.2		62.6167		24.8191	100.414	4.04584	2.01644	2.02913e-08	5.28515e-07
C09B9.2		321.579		191.303	451.856	2.36199	1.24	2.04869e-08	5.32976e-07
F37A4.5		229.135		122.032	336.237	2.75532	1.46222	2.08108e-08	5.40761e-07
F55A11.11		222.766		143.958	301.575	2.09488	1.06687	2.10563e-08	5.4649e-07
W01B11.2		225.753		104.838	346.668	3.30671	1.7254	2.11592e-08	5.48511e-07
Y37D8A.15		635		467.371	802.629	1.71733	0.780165	2.1346e-08	5.527e-07
W02B9.1		5347.12		6424.27	4269.98	0.664665	-0.589301	2.178e-08	5.63271e-07
F36A4.2		78.7925		36.8601	120.725	3.27522	1.71159	2.19602e-08	5.66595e-07
C15A11.2		111.765		60.7346	162.796	2.68045	1.42248	2.2077e-08	5.68937e-07
E03A3.4		103.629		53.1395	154.118	2.90025	1.53618	2.2652e-08	5.83069e-07
F14H8.1		720.292		522.663	917.92	1.75624	0.812488	2.29788e-08	5.90787e-07
M7.7		160.589		95.7682	225.409	2.35369	1.23493	2.33736e-08	5.98829e-07
F44F4.4		1283.35		975.855	1590.85	1.63021	0.705062	2.33662e-08	5.98829e-07
Y45F10D.12		21392.3		27003.8	15780.7	0.584387	-0.775004	2.35618e-08	6.02946e-07
F36A2.10		775.559		447.49	1103.63	2.46627	1.30233	2.36195e-08	6.03717e-07
C36E8.5		40969.4		49118	32820.7	0.668201	-0.581645	2.40443e-08	6.13859e-07
B0213.3		736.284		548.824	923.745	1.68314	0.751152	2.40987e-08	6.14532e-07
Y43C5B.3		432.277		274.941	589.614	2.14451	1.10065	2.41376e-08	6.14806e-07
F23F1.6		566.092		412.445	719.739	1.74505	0.803271	2.41989e-08	6.15652e-07
Y48G1A.5		8279.75		9956.39	6603.11	0.663203	-0.592478	2.425e-08	6.16236e-07
Y119C1B.1		196.54		88.5583	304.521	3.43865	1.78184	2.44254e-08	6.19976e-07
R04A9.2		1229.19		1509.66	948.712	0.628426	-0.670185	2.46475e-08	6.24887e-07
F48F5.2		246.478		123.325	369.63	2.9972	1.58361	2.48836e-08	6.30145e-07
T20B3.1		144.876		86.2245	203.527	2.36043	1.23905	2.60702e-08	6.58672e-07
F09F7.3		8498.72		10481.4	6516.06	0.62168	-0.685757	2.63857e-08	6.65873e-07
T15B7.3		17087		23065.5	11108.5	0.481608	-1.05407	2.66413e-08	6.7155e-07
W02F12.3		6335.63		7607.7	5063.56	0.665584	-0.587306	2.67475e-08	6.73454e-07
F21D5.1		7020.38		8444.22	5596.55	0.662768	-0.593425	2.68285e-08	6.74718e-07
T20G5.1		23520.4		28376.9	18663.9	0.657715	-0.604467	2.68806e-08	6.75253e-07
K01A2.2		145.395		86.3727	204.418	2.36669	1.24287	2.69692e-08	6.76061e-07
Y54G2A.14		1440.48		1066.14	1814.82	1.70223	0.767426	2.69746e-08	6.76061e-07
C34D4.2		127.022		63.6799	190.364	2.9894	1.57985	2.71841e-08	6.80536e-07
F08G5.3		168.35		101.474	235.226	2.31809	1.21294	2.72771e-08	6.82083e-07
F42G2.2		358.155		242.894	473.415	1.94906	0.962776	2.73359e-08	6.82774e-07
F49E12.2		1169.3		1733.26	605.335	0.349246	-1.51768	2.7538e-08	6.87039e-07
Y48G1C.8		3199.19		4080.17	2318.21	0.568165	-0.815619	2.76385e-08	6.88761e-07
F27C8.5		391.615		190.099	593.131	3.12012	1.6416	2.82089e-08	7.0138e-07
Y66A7A.4		73.473		31.5288	115.417	3.66069	1.87212	2.833e-08	7.02585e-07
R10H10.2		379.036		191.895	566.176	2.95044	1.56093	2.83536e-08	7.02585e-07
C24H10.5		2088.6		1622.52	2554.68	1.57451	0.654903	2.8322e-08	7.02585e-07
Y69H2.3		3359.25		4380.7	2337.8	0.53366	-0.906008	2.85235e-08	7.05998e-07
T08A9.11		519.797		338.607	700.988	2.07021	1.04978	2.88121e-08	7.12334e-07
M04C3.1		1253.3		961.903	1544.7	1.60588	0.683364	2.89195e-08	7.14185e-07
T06E4.12		36.2881		3.88643	68.6897	17.6742	4.14358	2.91969e-08	7.20224e-07
T22C1.9		179.985		111.106	248.863	2.23986	1.16341	2.95811e-08	7.2888e-07
F20D6.6		367.117		215.151	519.083	2.41264	1.27061	2.96339e-08	7.29359e-07
T24B8.7		8794.63		10745.7	6843.55	0.636863	-0.650945	2.96795e-08	7.29662e-07
C41D11.7		1324.7		1628.26	1021.14	0.627135	-0.673151	2.99454e-08	7.35374e-07
Y66D12A.9		1528.28		1879.6	1176.97	0.626182	-0.675346	3.02205e-08	7.413e-07
ZC373.2		4103.63		4977.35	3229.91	0.648922	-0.623883	3.03599e-08	7.43884e-07
T27C10.8		97.4412		49.8125	145.07	2.91232	1.54217	3.04573e-08	7.45437e-07
F20D6.1		27.8474		4.88678	50.8081	10.397	3.3781	3.09091e-08	7.55651e-07
T10B9.2		392.49		169	615.98	3.64485	1.86586	3.13201e-08	7.64845e-07
D2045.1		9309.43		11157.6	7461.24	0.668711	-0.580544	3.14292e-08	7.66655e-07
Y37F4.5		146.552		84.8165	208.288	2.45575	1.29616	3.15355e-08	7.67539e-07
Y105C5B.17		84.1186		35.7412	132.496	3.7071	1.89029	3.16542e-08	7.6927e-07
F53C3.1		104.605		54.0213	155.19	2.87275	1.52243	3.16768e-08	7.6927e-07
ZK783.4		1469.24		1944.07	994.397	0.511502	-0.967188	3.17415e-08	7.69985e-07
Y69A2AR.4		157.294		93.6122	220.975	2.36054	1.23912	3.18683e-08	7.72207e-07
W01A11.5		370.712		478.889	262.534	0.548214	-0.867189	3.22294e-08	7.80094e-07
W03A5.1		136.305		77.9586	194.651	2.49685	1.32011	3.23932e-08	7.83193e-07
DY3.7		6804.23		8165.23	5443.24	0.666637	-0.585027	3.26966e-08	7.89657e-07
F58F12.3		128.186		71.627	184.746	2.57927	1.36697	3.287e-08	7.92971e-07
K03E6.5		316.957		216.552	417.362	1.9273	0.946584	3.33852e-08	8.04428e-07
K08F4.7		326.957		425.739	228.174	0.535948	-0.899834	3.34184e-08	8.04428e-07
F56B3.6		434.693		240	629.386	2.62244	1.39091	3.34866e-08	8.05186e-07
K02D7.4		3167.85		2481.43	3854.27	1.55325	0.635287	3.36112e-08	8.07296e-07
Y48D7A.2		322.625		219.29	425.96	1.94245	0.957878	3.37397e-08	8.09399e-07
C13B4.2		7595.5		9139.08	6051.93	0.662203	-0.594654	3.37727e-08	8.09399e-07
Y51B9A.3		83.9611		41.2171	126.705	3.07409	1.62016	3.473e-08	8.31433e-07
C32F10.4		507.632		367.283	647.982	1.76426	0.819063	3.52202e-08	8.42248e-07
R06F6.7		113.196		62.6464	163.746	2.61381	1.38616	3.55672e-08	8.48692e-07
F36A4.7		9078.36		11485	6671.69	0.580903	-0.783631	3.57605e-08	8.5145e-07
R05H5.2		51.0906		18.6357	83.5455	4.48309	2.16449	3.60864e-08	8.57345e-07
F44D12.4		4504.84		2836.81	6172.86	2.17599	1.12167	3.6318e-08	8.61913e-07
F49E8.4		855.822		1069.58	642.065	0.600297	-0.736252	3.63742e-08	8.62313e-07
T04H1.3		50.8933		15.1902	86.5965	5.70083	2.51117	3.65139e-08	8.64688e-07
F35E2.10		48.4784		17.0759	79.8809	4.678	2.22589	3.66153e-08	8.66154e-07
Y57G11A.4		452.504		321.472	583.537	1.8152	0.860132	3.68817e-08	8.71515e-07
T09F5.12		131.627		76.7176	186.536	2.43146	1.28182	3.7069e-08	8.74997e-07
B0218.7		571.793		352.9	790.686	2.24054	1.16385	3.75763e-08	8.86017e-07
F38E1.7		4420.07		5310.94	3529.19	0.664514	-0.589629	3.78013e-08	8.90364e-07
C17F3.1		593.192		412.041	774.342	1.87928	0.910183	3.82262e-08	8.99403e-07
F53A9.9		106.633		57.9634	155.303	2.67933	1.42187	3.86907e-08	9.09357e-07
T08G5.10		133.26		218.764	47.7571	0.218304	-2.19559	3.88198e-08	9.10436e-07
Y47D3A.10		185.154		96.8313	273.477	2.82426	1.49787	3.90404e-08	9.14632e-07
R08C7.8		59.1011		24.2597	93.9425	3.87237	1.95322	3.95542e-08	9.25679e-07
F45D3.4		2975.14		2069.37	3880.92	1.87541	0.907202	4.02448e-08	9.40835e-07
C31H1.1		131.956		53.3173	210.595	3.94985	1.9818	4.1725e-08	9.7336e-07
F54B3.1		8484.81		10303.1	6666.49	0.647035	-0.628084	4.20401e-08	9.79669e-07
C03A7.7		13.8535		0	27.707	Inf	Inf	4.25333e-08	9.90107e-07
Y51H7C.9		159.967		96.5054	223.43	2.3152	1.21114	4.52939e-08	1.05325e-06
F07F6.1		273.794		113.051	434.537	3.84371	1.9425	4.55347e-08	1.05773e-06
Y54F10AM.8		2208.83		1723.9	2693.76	1.5626	0.64395	4.62332e-08	1.07282e-06
T05H4.6		9405.49		11305.5	7505.44	0.663873	-0.591021	4.75842e-08	1.10183e-06
Y44E3A.2		506.745		367.602	645.889	1.75704	0.813144	4.76708e-08	1.10267e-06
C24A11.1		241.211		143.02	339.401	2.3731	1.24677	4.83507e-08	1.11722e-06
K09C6.1		85.2607		28.0276	142.494	5.08406	2.34598	4.88876e-08	1.12843e-06
T28F4.3		160.715		97.3872	224.043	2.30054	1.20197	4.92858e-08	1.13643e-06
F20D12.5		126.125		72.1272	180.123	2.4973	1.32037	4.99258e-08	1.14997e-06
T13F3.8		119.295		57.4372	181.153	3.15392	1.65715	5.00647e-08	1.15196e-06
F28H7.6		100.142		51.8428	148.44	2.86328	1.51767	5.07716e-08	1.167e-06
K02C4.5		565.452		414.821	716.083	1.72625	0.78764	5.08982e-08	1.16869e-06
Y46C8AL.5		66.602		32.029	101.175	3.15886	1.6594	5.19233e-08	1.19097e-06
C46H11.6		71.7761		32.7662	110.786	3.38111	1.75749	5.27326e-08	1.20827e-06
C27D8.1		534.583		320.96	748.207	2.33116	1.22105	5.32145e-08	1.21804e-06
C01C4.3		365.764		258.207	473.322	1.83311	0.874297	5.33734e-08	1.2204e-06
D1081.5		146.928		49.5197	244.337	4.93413	2.3028	5.38708e-08	1.23049e-06
H24G06.1		1695.23		1317.27	2073.19	1.57385	0.654296	5.41404e-08	1.23536e-06
ZK1128.3		186.701		106.69	266.711	2.49986	1.32185	5.44576e-08	1.2413e-06
F10D11.4		47.3581		16.987	77.7293	4.57581	2.19403	5.4793e-08	1.24765e-06
T01C3.5		87.7821		44.4255	131.139	2.95188	1.56163	5.58444e-08	1.27027e-06
F37A8.1		55.2385		20.6067	89.8703	4.36121	2.12473	5.60615e-08	1.27389e-06
F18A12.1		178.314		88.6472	267.98	3.023	1.59598	5.6962e-08	1.29301e-06
Y57G11B.3		84.7109		41.6283	127.794	3.06987	1.61818	5.77607e-08	1.30978e-06
W03F11.3		118.388		65.7102	171.067	2.60335	1.38037	5.80899e-08	1.31588e-06
C49C8.5		772.832		582.446	963.219	1.65375	0.72574	5.81624e-08	1.31616e-06
F27D4.6		358.119		251.497	464.741	1.8479	0.885886	5.89308e-08	1.33218e-06
K08F8.5		96.3866		49.3716	143.402	2.90454	1.53831	6.01038e-08	1.35729e-06
F54H12.8		114.549		46.1038	182.993	3.96915	1.98883	6.03564e-08	1.36159e-06
F42A10.7		627.106		992.271	261.941	0.263982	-1.92149	6.04683e-08	1.36271e-06
C17H12.11		261.398		176.343	346.453	1.96466	0.97428	6.08701e-08	1.37036e-06
Y76B12C.6		2048.11		2476.53	1619.69	0.654018	-0.612598	6.12388e-08	1.37724e-06
F02D8.4		1055.82		811.598	1300.03	1.60182	0.679709	6.20745e-08	1.39461e-06
C03C11.1		214.294		125.474	303.113	2.41574	1.27247	6.33377e-08	1.42153e-06
R11H6.4		169.007		104.949	233.066	2.22075	1.15105	6.34853e-08	1.42338e-06
F13A7.7		72.7932		32.7959	112.791	3.43917	1.78206	6.36438e-08	1.42548e-06
Y48B6A.11		1292.63		1614.21	971.057	0.60157	-0.733196	6.48381e-08	1.45074e-06
R05D7.2		32.3393		7.74323	56.9353	7.35291	2.87832	6.50189e-08	1.4533e-06
F23B12.1		64.9536		27.8498	102.057	3.66457	1.87364	6.6082e-08	1.47406e-06
D2092.1		514.663		374.881	654.445	1.74574	0.803839	6.60699e-08	1.47406e-06
Y37E3.11		2166.43		2627.01	1705.86	0.649354	-0.622922	6.64793e-08	1.48141e-06
F14H3.2		59.248		24.7006	93.7954	3.79729	1.92497	6.70444e-08	1.49249e-06
Y37E3.16		501.46		662.586	340.334	0.513645	-0.961155	6.76478e-08	1.50134e-06
C25G4.6		1090.48		724.55	1456.42	2.0101	1.00727	6.75827e-08	1.50134e-06
F47H4.12		56.7273		22.8741	90.5805	3.95995	1.98548	6.7792e-08	1.50302e-06
Y105C5B.18		127.746		72.7755	182.716	2.51068	1.32808	6.89543e-08	1.52724e-06
F54D5.5		1472.39		1794.8	1149.99	0.640733	-0.642205	6.92584e-08	1.53243e-06
R07E5.6		258.295		161.245	355.346	2.20376	1.13997	6.94657e-08	1.53547e-06
C16A3.7		8379.47		10098.9	6660.03	0.65948	-0.600599	6.95518e-08	1.53582e-06
R09E10.1		121.102		68.0369	174.168	2.55991	1.35609	6.97283e-08	1.53816e-06
C28C12.4		198.885		129.235	268.535	2.07788	1.05511	6.9934e-08	1.54115e-06
F15D3.4		133.025		77.0436	189.007	2.45325	1.29469	7.05304e-08	1.55273e-06
R10E9.2		1535.71		1001.11	2070.3	2.06801	1.04824	7.066e-08	1.55402e-06
R102.10		174.015		92.6486	255.381	2.75645	1.46281	7.10092e-08	1.56014e-06
B0507.3		65.638		24.6378	106.638	4.32824	2.11378	7.21023e-08	1.58257e-06
F37H8.4		68.5297		31.7955	105.264	3.31066	1.72712	7.23079e-08	1.58549e-06
Y6B3B.4		3351.5		4058.03	2644.96	0.651785	-0.617532	7.33927e-08	1.60767e-06
F19C7.1		4123.78		5260.72	2986.85	0.567765	-0.816633	7.40973e-08	1.62148e-06
C50F4.2		241.293		128.745	353.841	2.74838	1.45858	7.41931e-08	1.62195e-06
K05F1.1		101.819		54.5511	149.088	2.73299	1.45048	7.59845e-08	1.65616e-06
Y105C5A.24		371.336		263.534	479.139	1.81813	0.862452	7.66634e-08	1.66929e-06
C18E9.8		283.215		92.2077	474.222	5.14297	2.3626	7.74054e-08	1.68211e-06
K12D12.2		9268.94		11220.3	7317.55	0.65217	-0.61668	7.737e-08	1.68211e-06
F32F2.1		500.696		365.008	636.383	1.74348	0.801967	7.77422e-08	1.68608e-06
R107.5		3484.63		4207.28	2761.98	0.656477	-0.607185	7.76837e-08	1.68608e-06
Y38F2AR.10		134.184		75.7208	192.646	2.54417	1.34719	7.7962e-08	1.68918e-06
F31E3.5		228995		279264	178726	0.63999	-0.643879	7.89378e-08	1.70863e-06
C44B9.4		2926.83		3517.21	2336.46	0.664293	-0.590108	7.90355e-08	1.70906e-06
C43E11.3		5165.33		6514.93	3815.73	0.585691	-0.77179	7.93917e-08	1.71506e-06
C27A7.1		834.926		629.35	1040.5	1.6533	0.725347	7.96737e-08	1.71946e-06
R09E10.6		3966.47		2342.59	5590.35	2.38639	1.25483	8.02361e-08	1.72989e-06
C07A12.5		577.753		722.477	433.029	0.599367	-0.738489	8.04726e-08	1.73329e-06
ZK1290.14		194.399		126.823	261.975	2.06567	1.04661	8.09573e-08	1.74201e-06
Y40B10A.4		34.8609		9.74394	59.9779	6.15541	2.62186	8.20229e-08	1.76321e-06
Y46G5A.21		1752.81		1369.18	2136.43	1.56037	0.641892	8.2979e-08	1.78201e-06
F18G5.6		774.993		520.207	1029.78	1.97955	0.985175	8.38666e-08	1.79931e-06
Y57G11C.6		212.193		111.284	313.102	2.81354	1.49238	8.42971e-08	1.80678e-06
ZK813.1		5070.96		6089.56	4052.36	0.665461	-0.587575	8.46443e-08	1.81245e-06
M02B1.4		142.512		85.3166	199.707	2.34077	1.22698	8.51926e-08	1.82063e-06
K10C2.4		2771.92		3357.25	2186.59	0.651305	-0.618594	8.62568e-08	1.84157e-06
R13A5.6		425.313		297.423	553.203	1.85999	0.895294	8.68125e-08	1.85163e-06
F54B8.3		295.881		202.54	389.222	1.9217	0.942385	8.70653e-08	1.85522e-06
K11D9.3		840.787		636.886	1044.69	1.64031	0.713967	8.78691e-08	1.87053e-06
T22A3.6		41.6397		14.2787	69.0007	4.83242	2.27275	9.05906e-08	1.92472e-06
F46F2.5		76.0023		115.43	36.5743	0.316852	-1.65812	9.25285e-08	1.96399e-06
C09G9.4		152.413		90.9999	213.827	2.34975	1.23251	9.30553e-08	1.97326e-06
H36L18.2		2165.01		1644.02	2685.99	1.63379	0.708227	9.31758e-08	1.9739e-06
K01C8.5		2196.71		2650.67	1742.75	0.657475	-0.604993	9.46e-08	2.00214e-06
C36F7.5		71.6386		33.5627	109.714	3.26894	1.70882	9.5047e-08	2.00966e-06
C32H11.4		105.707		174.52	36.8937	0.211401	-2.24194	9.60848e-08	2.0261e-06
C43G2.3		214.324		132.658	295.99	2.23123	1.15784	9.61021e-08	2.0261e-06
F35B12.10		281.061		192.533	369.588	1.91961	0.940811	9.64133e-08	2.03071e-06
F55B11.7		54.4296		23.1704	85.6888	3.69819	1.88682	9.97661e-08	2.09729e-06
F52E1.5		157.047		97.4133	216.68	2.22434	1.15338	1.0059e-07	2.11259e-06
Y105C5B.11		49.3291		18.4579	80.2003	4.34504	2.11937	1.00921e-07	2.1175e-06
F35A5.2		84.0601		42.1842	125.936	2.98538	1.57792	1.01564e-07	2.12896e-06
Y47D3A.31		336.034		201.814	470.254	2.33014	1.22042	1.01903e-07	2.13198e-06
F02H6.2		900.801		1116.24	685.359	0.613987	-0.70372	1.01883e-07	2.13198e-06
T13H10.1		262.625		140.168	385.083	2.7473	1.45801	1.03729e-07	2.16235e-06
Y80D3A.2		7545.46		9384.02	5706.89	0.60815	-0.7175	1.03749e-07	2.16235e-06
T07F10.4		119.27		63.8802	174.66	2.73418	1.45111	1.0427e-07	2.17114e-06
R07C12.1		17.1153		1.64868	32.5819	19.7624	4.30469	1.04615e-07	2.17213e-06
F07D3.3		30.9398		7.24306	54.6366	7.5433	2.9152	1.04553e-07	2.17213e-06
Y50E8A.12		84.3697		29.4689	139.271	4.72602	2.24063	1.04471e-07	2.17213e-06
F47D12.1		143.989		86.8729	201.106	2.31495	1.21098	1.05173e-07	2.18086e-06
C43F9.6		332.682		182.415	482.95	2.64754	1.40465	1.05235e-07	2.18086e-06
H06I04.5		190.8		78.4031	303.197	3.86716	1.95127	1.06363e-07	2.19867e-06
F01G10.5		249.323		121.973	376.673	3.08817	1.62675	1.06396e-07	2.19867e-06
F54H12.7		264.894		149.941	379.846	2.5333	1.34102	1.06371e-07	2.19867e-06
T03D8.3		1236.06		957.024	1515.1	1.58314	0.662785	1.06529e-07	2.19937e-06
Y41C4A.19		1013.71		744.235	1283.19	1.72418	0.785908	1.07261e-07	2.21237e-06
F13A7.1		745.8		418.35	1073.25	2.56543	1.3592	1.07684e-07	2.21902e-06
M153.1		146.833		204.926	88.7398	0.433033	-1.20745	1.09777e-07	2.2579e-06
K09D9.11		69.0085		31.2064	106.81	3.42271	1.77514	1.11012e-07	2.28117e-06
Y43F8B.23		37.4963		11.3334	63.6593	5.61699	2.4898	1.11775e-07	2.29468e-06
F08G5.4		201.663		21.0512	382.275	18.1593	4.18264	1.11987e-07	2.29689e-06
C14A4.13		133.499		60.8531	206.145	3.38758	1.76026	1.12252e-07	2.30017e-06
C47A4.3		103.061		55.9959	150.126	2.68101	1.42278	1.13537e-07	2.32432e-06
K01G5.1		1191.92		1456.98	926.864	0.636154	-0.652552	1.13744e-07	2.32639e-06
T12B5.10		417.569		301.632	533.506	1.76873	0.822716	1.16242e-07	2.37305e-06
Y69A2AR.9		112.127		52.8764	171.378	3.2411	1.69648	1.16653e-07	2.37922e-06
ZK945.6		69.8328		32.8551	106.81	3.25095	1.70086	1.17612e-07	2.39654e-06
F16F9.4		243.166		162.472	323.861	1.99334	0.995186	1.18489e-07	2.41218e-06
F21H7.5		1678.79		1026.53	2331.06	2.27082	1.18321	1.22476e-07	2.49103e-06
T04D3.1		647.079		804.678	489.481	0.608294	-0.717159	1.22826e-07	2.49582e-06
F08F8.6		59.2103		25.2304	93.1902	3.69357	1.88502	1.24528e-07	2.52572e-06
C56E10.1		310.456		219.372	401.54	1.83041	0.872163	1.25008e-07	2.53312e-06
F01G10.8		496.281		364.656	627.907	1.72191	0.784013	1.25248e-07	2.53563e-06
C12D8.19		78.1744		37.7419	118.607	3.14258	1.65195	1.25435e-07	2.53707e-06
F45E1.6		432.197		313.791	550.602	1.75468	0.811204	1.26015e-07	2.54646e-06
F54A3.4		124.242		56.1145	192.369	3.42815	1.77743	1.27783e-07	2.57981e-06
W09G10.4		2839.05		3411.43	2266.68	0.664435	-0.589799	1.27991e-07	2.58163e-06
F26A3.5		331.827		111.018	552.636	4.97791	2.31554	1.29243e-07	2.60447e-06
F15D4.4		98.1533		53.1656	143.141	2.69236	1.42887	1.29819e-07	2.61274e-06
C24A1.1		437.422		315.733	559.112	1.77084	0.824434	1.29891e-07	2.61274e-06
F52D2.4		2083.89		2513.58	1654.2	0.658105	-0.60361	1.30174e-07	2.61602e-06
F10F2.6		65.1518		28.9983	101.305	3.49349	1.80467	1.31446e-07	2.63917e-06
Y20F4.2		684.199		513.346	855.051	1.66564	0.73608	1.33065e-07	2.66922e-06
R07H5.9		41.0742		14.2194	67.929	4.7772	2.25616	1.33845e-07	2.6824e-06
R02D5.7		152.788		89.2327	216.344	2.42449	1.27768	1.35361e-07	2.70785e-06
Y106G6H.13		570.624		355.404	785.845	2.21113	1.14478	1.36649e-07	2.72862e-06
R11G10.1		594.855		444.319	745.391	1.6776	0.746402	1.37519e-07	2.7435e-06
T21E12.4		29842.7		38339.1	21346.4	0.556779	-0.844823	1.38668e-07	2.7639e-06
C15H9.11		159.65		97.2948	222.005	2.28178	1.19016	1.38882e-07	2.76548e-06
F53B6.1		211.952		140.539	283.365	2.01628	1.0117	1.39659e-07	2.77354e-06
F40E12.2		230.546		103.837	357.254	3.44051	1.78262	1.40589e-07	2.78949e-06
Y22F5A.1		148.943		83.694	214.192	2.55923	1.35571	1.42075e-07	2.81643e-06
C36A4.1		86.3138		153.191	19.4365	0.126878	-2.97849	1.43518e-07	2.84247e-06
C10A4.10		238.995		160.912	317.078	1.97051	0.978567	1.48569e-07	2.93984e-06
W03D8.2		83.0261		42.7176	123.335	2.88721	1.52968	1.51677e-07	2.99863e-06
T15B12.1		855.427		655.721	1055.13	1.60912	0.686268	1.51891e-07	3.00016e-06
AC3.10		87.8354		45.6037	130.067	2.85212	1.51203	1.53593e-07	3.03105e-06
K01A11.4		561.274		334.379	788.169	2.35711	1.23702	1.55686e-07	3.06682e-06
K03H1.5		707.326		536.257	878.396	1.63801	0.711948	1.55581e-07	3.06682e-06
C50F4.6		403.352		513.323	293.38	0.571531	-0.807097	1.5705e-07	3.09091e-06
B0250.5		3185.08		3833.64	2536.53	0.661649	-0.595862	1.58751e-07	3.12158e-06
F53F4.8		48.7911		18.9284	78.6538	4.15533	2.05496	1.59531e-07	3.1341e-06
F08F3.2		3145.87		3771.68	2520.06	0.668153	-0.58175	1.60269e-07	3.14296e-06
C25H3.11		1366.81		1677.83	1055.79	0.629259	-0.668274	1.64777e-07	3.22848e-06
K08D10.7		97.7517		52.6986	142.805	2.70984	1.43821	1.70391e-07	3.32954e-06
T13H2.4		4228.08		5089.99	3366.17	0.66133	-0.596557	1.70382e-07	3.32954e-06
ZK945.4		159.531		216.815	102.247	0.471584	-1.08441	1.73556e-07	3.38534e-06
C48E7.8		276.072		170.811	381.334	2.23249	1.15865	1.73412e-07	3.38534e-06
B0507.10		68.2352		32.6773	103.793	3.1763	1.66735	1.74171e-07	3.38866e-06
F25B5.7		2154.13		2595.15	1713.11	0.660119	-0.599203	1.73959e-07	3.38866e-06
C04E6.11		2188.47		2630.62	1746.32	0.663841	-0.59109	1.7419e-07	3.38866e-06
W02D3.7		798.264		538.761	1057.77	1.96333	0.973304	1.76808e-07	3.43653e-06
ZK697.6		65.9505		29.0576	102.843	3.5393	1.82346	1.77995e-07	3.45654e-06
Y66D12A.20		355.285		251.267	459.303	1.82795	0.870225	1.81167e-07	3.50571e-06
F21F3.2		103.616		50.0792	157.152	3.13807	1.64988	1.83151e-07	3.54097e-06
K02F6.9		133.03		79.663	186.397	2.33982	1.2264	1.83821e-07	3.55078e-06
ZK829.10		50.7714		19.6657	81.8771	4.16346	2.05778	1.8469e-07	3.56444e-06
C18A3.3		2427.07		2967.59	1886.55	0.635717	-0.653543	1.86831e-07	3.60245e-06
B0414.3		6075.92		7318.42	4833.43	0.660447	-0.598485	1.86989e-07	3.60245e-06
F41B5.4		127.339		75.773	178.904	2.36105	1.23943	1.88454e-07	3.62113e-06
F13E9.5		138.611		83.1678	194.054	2.33329	1.22236	1.88299e-07	3.62113e-06
W09D6.4		124.109		73.4535	174.765	2.37926	1.25051	1.97694e-07	3.77742e-06
C30F12.1		632.22		477.852	786.588	1.64609	0.719044	1.97819e-07	3.77742e-06
F16B12.6		1892.19		2296.23	1488.14	0.648082	-0.625752	1.97968e-07	3.77742e-06
F57B9.6		20349		24629.2	16068.7	0.652426	-0.616115	1.97956e-07	3.77742e-06
F08B4.1		2297.08		2756.26	1837.9	0.666808	-0.584656	2.00346e-07	3.81949e-06
M04G7.1		231.681		156.584	306.778	1.95918	0.970252	2.01918e-07	3.84276e-06
Y87G2A.16		134.303		28.2018	240.403	8.52439	3.0916	2.05869e-07	3.91456e-06
T06C10.4		418.412		306.167	530.657	1.73323	0.793463	2.08101e-07	3.95356e-06
F53A9.1		187.86		122.466	253.255	2.06796	1.04821	2.0944e-07	3.9707e-06
C36H8.1		645.068		315.339	974.797	3.09127	1.6282	2.09547e-07	3.9707e-06
T09F5.10		133.814		64.2393	203.388	3.1661	1.66271	2.0976e-07	3.9713e-06
F23B2.5		430.979		313.613	548.345	1.74847	0.806097	2.1394e-07	4.04695e-06
K03D10.3		1445.99		1743.4	1148.59	0.658819	-0.602046	2.15278e-07	4.06523e-06
Y47D3A.29		7538.66		9138.21	5939.1	0.64992	-0.621667	2.16229e-07	4.07967e-06
W04B5.2		142.39		61.8499	222.929	3.60436	1.84974	2.17174e-07	4.09398e-06
Y43C5A.2		2485.28		1905.58	3064.98	1.60842	0.685646	2.2342e-07	4.20448e-06
T02B11.9		74.1986		36.7119	111.685	3.04221	1.60512	2.24123e-07	4.21409e-06
ZK666.8		40.2918		12.0409	68.5426	5.69246	2.50905	2.25925e-07	4.24433e-06
H06H21.9		174.382		95.0345	253.73	2.66987	1.41677	2.29521e-07	4.3082e-06
T06E4.10		17.073		1.08924	33.0568	30.3484	4.92355	2.31177e-07	4.33228e-06
Y45G5AM.9		1577.5		1904.5	1250.51	0.656609	-0.606893	2.312e-07	4.33228e-06
C33F10.5		1532.95		1186.87	1879.03	1.58317	0.66282	2.31854e-07	4.34082e-06
F59A6.2		113.352		60.2344	166.469	2.76369	1.46659	2.32223e-07	4.34402e-06
C10H11.7		161.409		83.0528	239.765	2.88689	1.52952	2.32432e-07	4.34421e-06
C30F12.5		778.039		593.187	962.891	1.62325	0.698887	2.35278e-07	4.38535e-06
T23H2.2		792.364		606.409	978.319	1.6133	0.690013	2.3516e-07	4.38535e-06
Y48G8AL.10		1307.76		1578.82	1036.71	0.65664	-0.606826	2.35634e-07	4.38535e-06
B0207.9		59.877		27.3496	92.4043	3.37863	1.75644	2.37703e-07	4.4201e-06
C06C6.6		36.1143		11.4815	60.747	5.29085	2.4035	2.38314e-07	4.4277e-06
Y94H6A.6		255.188		175.098	335.279	1.91481	0.937198	2.39236e-07	4.4373e-06
T05A1.2		66132.1		83819.9	48444.2	0.577956	-0.790969	2.40067e-07	4.44519e-06
M04G12.4		665.973		504.194	827.752	1.64173	0.715218	2.40307e-07	4.44589e-06
C50F2.7		68.1379		32.4995	103.776	3.19316	1.67499	2.48718e-07	4.58601e-06
B0416.7		194.027		106.953	281.1	2.62825	1.3941	2.48544e-07	4.58601e-06
R13G10.4		63.0759		27.5867	98.5652	3.57293	1.83711	2.49205e-07	4.59111e-06
F35D11.2		359.552		258.503	460.601	1.7818	0.833338	2.50761e-07	4.61589e-06
K07A1.4		145.682		89.3512	202.014	2.26089	1.17689	2.53641e-07	4.66108e-06
C41C4.10		666.756		506.614	826.899	1.63221	0.706825	2.54216e-07	4.66772e-06
K02A6.3		393.663		273.282	514.044	1.881	0.911504	2.56828e-07	4.7078e-06
K08C7.1		335.247		451.792	218.702	0.484076	-1.04669	2.57284e-07	4.71222e-06
D1065.3		62.4063		24.2597	100.553	4.14486	2.05132	2.58735e-07	4.73482e-06
F20H11.2		8363.95		10492.2	6235.69	0.594317	-0.750697	2.59749e-07	4.74941e-06
F09E5.13		887.807		1088.41	687.2	0.631377	-0.663427	2.60946e-07	4.76732e-06
Y38H6C.15		98.9225		54.288	143.557	2.64436	1.40292	2.61662e-07	4.77641e-06
H20J04.1		162.051		63.9762	260.126	4.06598	2.0236	2.62506e-07	4.78784e-06
T11B7.5		247.212		169.715	324.71	1.91327	0.936039	2.63835e-07	4.80808e-06
Y51B9A.5		159.882		90.6479	229.116	2.52753	1.33773	2.65021e-07	4.82567e-06
F33H1.2		1039.44		1267.68	811.207	0.639916	-0.644045	2.66837e-07	4.8547e-06
F12A10.3		31.358		8.24341	54.4727	6.60803	2.72422	2.70083e-07	4.90154e-06
C32E8.5		1775.99		2139.57	1412.41	0.660136	-0.599164	2.71663e-07	4.92615e-06
F44G3.6		804.513		616.12	992.906	1.61155	0.688445	2.73602e-07	4.9572e-06
W03C9.1		60.2589		26.2308	94.2871	3.59452	1.8458	2.75369e-07	4.97811e-06
T25G3.2		15270.4		18310.7	12230.1	0.667924	-0.582245	2.75438e-07	4.97811e-06
T09B9.1		631.524		791.066	471.982	0.59664	-0.745068	2.76649e-07	4.99587e-06
ZK856.11		1168.69		1421.96	915.424	0.643775	-0.635372	2.80035e-07	5.05286e-06
F21F8.2		23.1886		4.29771	42.0795	9.79114	3.29148	2.89428e-07	5.21804e-06
T05H10.4		1566.7		2095.32	1038.07	0.495425	-1.01326	2.89883e-07	5.22195e-06
K09E4.1		316.136		204.522	427.75	2.09147	1.06451	2.90921e-07	5.23204e-06
Y37A1B.5		3514.01		2407.48	4620.53	1.91924	0.940535	2.9072e-07	5.23204e-06
F32B4.2		171.993		77.5769	266.408	3.43412	1.77994	2.91263e-07	5.23389e-06
T19D12.5		129.15		76.4841	181.817	2.37718	1.24925	2.91757e-07	5.23847e-06
F33E2.2		1900.29		1512.78	2287.8	1.51232	0.596761	2.92856e-07	5.2539e-06
Y15E3A.5		288.862		186.935	390.79	2.09051	1.06385	2.94315e-07	5.27576e-06
B0491.3		789.08		487.996	1090.16	2.23396	1.1596	2.97314e-07	5.31645e-06
Y70C5C.1		134.837		74.1871	195.487	2.63506	1.39783	2.99235e-07	5.34644e-06
K10D6.2		188.29		123.292	253.288	2.05438	1.0387	3.02318e-07	5.39713e-06
R06C7.5		2957.44		3545.32	2369.56	0.668364	-0.581295	3.06102e-07	5.4558e-06
F56F4.3		83.2493		42.8361	123.662	2.88688	1.52951	3.07617e-07	5.47834e-06
C09H10.7		981.453		1215.49	747.413	0.614905	-0.701565	3.08569e-07	5.49083e-06
C53B4.2		54.4722		21.2847	87.6597	4.11844	2.0421	3.09273e-07	5.49888e-06
F21D9.2		176.821		113.844	239.798	2.10637	1.07476	3.11271e-07	5.52992e-06
T05C12.9		24.2332		4.85715	43.6092	8.97836	3.16645	3.12693e-07	5.55068e-06
F38A1.9		51.7569		21.6367	81.8771	3.78417	1.91998	3.15947e-07	5.60391e-06
Y66A7A.9		63.5257		30.0579	96.9935	3.22688	1.69014	3.23157e-07	5.72715e-06
R05G6.10		313.915		218.168	409.663	1.87774	0.909	3.24803e-07	5.75166e-06
ZK484.7		147.567		90.8221	204.312	2.24959	1.16966	3.28511e-07	5.81263e-06
F49B2.6		162.86		102.093	223.627	2.19043	1.13122	3.32522e-07	5.87886e-06
C33C12.4		52.3732		21.3143	83.432	3.91436	1.96878	3.34907e-07	5.91624e-06
C49A1.3		37.9681		12.1298	63.8064	5.26028	2.39514	3.38237e-07	5.97026e-06
C24G6.4		602.519		749.745	455.294	0.607265	-0.719603	3.40231e-07	6.00061e-06
C05C8.3		448.135		565.874	330.396	0.583868	-0.776286	3.42676e-07	6.03888e-06
K03C7.2		1007.18		784.664	1229.69	1.56716	0.648154	3.45131e-07	6.07237e-06
F59H6.4		62.3203		29.7652	94.8754	3.18746	1.67241	3.51685e-07	6.18271e-06
K12B6.2		49.1597		19.6657	78.6538	3.99955	1.99984	3.53261e-07	6.20544e-06
C23G10.1		108.331		51.5501	165.112	3.20294	1.6794	3.56512e-07	6.25753e-06
Y56A3A.31		938.378		1143.38	733.372	0.641405	-0.640692	3.59951e-07	6.30778e-06
C52D10.3		38.057		64.0319	12.0822	0.18869	-2.40591	3.61705e-07	6.33346e-06
F58E6.5		699.174		395.298	1003.05	2.53745	1.34338	3.62221e-07	6.33743e-06
H06A10.1		213.068		134.655	291.48	2.16465	1.11413	3.66453e-07	6.40635e-06
K11G12.5		1464.7		1771.63	1157.78	0.653513	-0.613711	3.70569e-07	6.47313e-06
K08C9.2		561.45		315.954	806.945	2.55399	1.35275	3.7229e-07	6.49285e-06
T23B3.5		655.986		352.989	958.983	2.71675	1.44188	3.72077e-07	6.49285e-06
F47H4.8		54.5992		23.4928	85.7056	3.64816	1.86717	3.74888e-07	6.53296e-06
F36A4.10		293.383		198.154	388.613	1.96117	0.971714	3.78953e-07	6.59855e-06
B0240.2		43.708		15.9274	71.4886	4.48841	2.1662	3.84765e-07	6.6891e-06
F15H10.4		76.6674		38.1235	115.211	3.02205	1.59553	3.92475e-07	6.79617e-06
F40A3.6		778.865		599.996	957.735	1.59624	0.674674	3.93502e-07	6.80858e-06
Y57G11C.14		114.497		66.7698	162.225	2.42961	1.28072	3.94895e-07	6.82729e-06
F13E6.4		742.811		569.227	916.395	1.60989	0.686966	3.95398e-07	6.83059e-06
F52H2.6		1189.56		929.362	1449.76	1.55995	0.641499	3.97713e-07	6.86175e-06
T24B8.4		1363.1		1073.97	1652.23	1.53844	0.621466	3.97828e-07	6.86175e-06
C45G9.12		71.6082		33.7962	109.42	3.23765	1.69495	4.00591e-07	6.90398e-06
C33D9.1		519.906		388.942	650.869	1.67343	0.742812	4.01574e-07	6.91548e-06
F13C5.5		470.197		315.555	624.839	1.98013	0.985593	4.09301e-07	7.03748e-06
Y37E11AL.7		1610.57		1931.09	1290.04	0.668039	-0.581996	4.11782e-07	7.07457e-06
C02E7.7		23.3946		3.327	43.4622	13.0635	3.70747	4.13552e-07	7.09942e-06
Y22D7AR.9		473.141		350.411	595.871	1.70049	0.765953	4.22167e-07	7.23031e-06
Y67D8C.5		33598.5		41882.7	25314.2	0.604408	-0.726406	4.26652e-07	7.30142e-06
R03A10.2		69.1225		34.7966	103.448	2.97295	1.5719	4.28577e-07	7.32863e-06
C18H7.7		71.5588		33.0922	110.025	3.32482	1.73327	4.31852e-07	7.36738e-06
F32A11.3		1118.43		565.261	1671.6	2.95722	1.56424	4.31603e-07	7.36738e-06
Y47G6A.3		144.724		88.7918	200.656	2.25985	1.17623	4.34824e-07	7.4123e-06
F13H8.12		42.0096		15.7792	68.24	4.32468	2.11259	4.36407e-07	7.43351e-06
C29E6.3		36.5394		12.1595	60.9193	5.01003	2.32482	4.43686e-07	7.54577e-06
C32F10.6		550.993		740.487	361.498	0.48819	-1.03449	4.44886e-07	7.56031e-06
ZK970.6		24.7048		6.09455	43.3151	7.10718	2.82928	4.46331e-07	7.57898e-06
T18H9.1		81.9047		5.53512	158.274	28.5946	4.83767	4.56445e-07	7.73872e-06
C26E6.4		6469.4		7923.18	5015.63	0.633032	-0.659649	4.63921e-07	7.85332e-06
R11D1.11		908.303		577.763	1238.84	2.14421	1.10044	4.64776e-07	7.86172e-06
R08E5.1		56.2068		87.1692	25.2444	0.289602	-1.78786	4.66757e-07	7.88914e-06
F52D2.6		609.307		751.62	466.993	0.621316	-0.686601	4.75731e-07	8.02223e-06
C46H11.4		920.783		716.13	1125.44	1.57155	0.652189	4.75684e-07	8.02223e-06
F53B6.7		204.987		131.95	278.024	2.10704	1.07522	4.84448e-07	8.14416e-06
C01G10.1		142.449		63.1205	221.778	3.51357	1.81294	4.85532e-07	8.15613e-06
H27M09.5		166.49		106.983	225.997	2.11246	1.07892	4.90717e-07	8.2369e-06
F41G3.5		118.31		70.1265	166.494	2.3742	1.24744	4.92977e-07	8.26732e-06
F11G11.4		180.994		106.927	255.062	2.38538	1.25422	4.93284e-07	8.26732e-06
F40H6.1		216.416		110.488	322.344	2.91746	1.54471	5.01526e-07	8.39903e-06
C10C6.3		67.1555		31.2953	103.016	3.29173	1.71884	5.02748e-07	8.40309e-06
F25H2.5		32504.1		39919.3	25088.9	0.628491	-0.670036	5.0292e-07	8.40309e-06
Y106G6G.1		193.598		113.963	273.233	2.39756	1.26157	5.0535e-07	8.43727e-06
H12D21.5		60.3733		28.9391	91.8076	3.17245	1.6656	5.09742e-07	8.50412e-06
F14B8.3		473.032		349.47	596.594	1.70714	0.771582	5.1684e-07	8.60941e-06
Y47H10A.1		200.303		132.773	267.833	2.01723	1.01237	5.17587e-07	8.61531e-06
T03F6.6		413.364		253.571	573.157	2.26034	1.17654	5.18069e-07	8.61678e-06
F28A10.1		28.9832		7.62471	50.3416	6.60243	2.723	5.20429e-07	8.64946e-06
R09E10.7		1256.89		1516.79	996.982	0.657298	-0.605381	5.23093e-07	8.68715e-06
Y22F5A.6		62.3156		28.0537	96.5774	3.4426	1.7835	5.24728e-07	8.7077e-06
Y76A2A.1		269.97		152.798	387.142	2.53369	1.34124	5.25587e-07	8.71065e-06
F56D6.17		133.426		81.3709	185.481	2.27945	1.18869	5.31304e-07	8.79018e-06
C27D6.11		182.349		115.73	248.968	2.15128	1.1052	5.34869e-07	8.84249e-06
T27E4.6		57.1051		25.2897	88.9205	3.51608	1.81397	5.47324e-07	9.02979e-06
T22H6.7		321.824		231.416	412.231	1.78134	0.832961	5.47435e-07	9.02979e-06
F38H4.4		279.393		175.464	383.322	2.18461	1.12738	5.52108e-07	9.09318e-06
T10H10.1		574.92		421.09	728.75	1.73063	0.791296	5.51981e-07	9.09318e-06
W09C3.8		46.155		18.6949	73.615	3.9377	1.97735	5.56881e-07	9.16489e-06
T25F10.3		438.845		326.214	551.476	1.69054	0.75748	5.75698e-07	9.45326e-06
Y40B1A.3		910.251		1103.93	716.571	0.649109	-0.623468	5.81703e-07	9.53758e-06
T05H4.2		98.3558		55.9367	140.775	2.51669	1.33153	5.82946e-07	9.55081e-06
F38B2.6		162.981		104.979	220.984	2.10503	1.07384	5.84429e-07	9.56795e-06
T11F9.5		36.9238		13.1006	60.747	4.63698	2.21318	5.86345e-07	9.59215e-06
C27B7.6		183.865		109.928	257.802	2.34518	1.2297	5.89915e-07	9.63615e-06
F29G9.4		952.523		740.498	1164.55	1.57266	0.653203	5.92564e-07	9.67221e-06
C15C6.2		2063.12		1160.28	2965.96	2.55624	1.35403	5.94126e-07	9.69049e-06
R10H1.1		278.406		196.297	360.515	1.83657	0.877017	5.96372e-07	9.71989e-06
Y43C5B.2		57.7442		14.927	100.561	6.73686	2.75208	6.17285e-07	1.00086e-05
C06A5.1		5208.68		6269.48	4147.88	0.661598	-0.595972	6.25959e-07	1.01268e-05
Y37D8A.13		3965.65		4799.59	3131.71	0.652495	-0.61596	6.28378e-07	1.01584e-05
T19E7.6		309.611		218.964	400.258	1.82796	0.870235	6.32789e-07	1.02221e-05
W03F11.1		2803.05		3740.09	1866.01	0.498922	-1.00311	6.33285e-07	1.02226e-05
W06D4.1		1730.72		2083.26	1378.17	0.661546	-0.596087	6.34357e-07	1.02324e-05
Y53F4B.19		305.225		192.274	418.177	2.17491	1.12095	6.41594e-07	1.03415e-05
F57B9.8		117.98		70.0968	165.864	2.36621	1.24258	6.45967e-07	1.03891e-05
F37A4.4		568.95		350.517	787.383	2.24634	1.16758	6.50338e-07	1.04517e-05
T04A8.14		11665.9		14653.3	8678.45	0.592252	-0.755718	6.56468e-07	1.05425e-05
K01G12.3		111.152		155.11	67.1936	0.4332	-1.2069	6.56987e-07	1.05431e-05
H32C10.1		181.697		102.189	261.206	2.55611	1.35395	6.65503e-07	1.06719e-05
D1081.10		26.6084		6.06492	47.1519	7.77454	2.95876	6.70866e-07	1.0738e-05
Y37D8A.17		1134.55		1367.32	901.775	0.659521	-0.600509	6.70911e-07	1.0738e-05
F31E9.11		100.399		56.022	144.776	2.58427	1.36975	6.75459e-07	1.07996e-05
R11A8.7		16424		19830.8	13017.1	0.656409	-0.607333	6.75932e-07	1.07996e-05
R07B7.13		53.7104		24.4635	82.9572	3.39105	1.76173	6.7812e-07	1.08267e-05
D2023.7		17.0318		31.6177	2.44585	0.0773569	-3.69233	6.79758e-07	1.08449e-05
F40E3.5		136.915		76.5434	197.286	2.57744	1.36594	6.82398e-07	1.08791e-05
B0218.1		1348.45		1064.8	1632.1	1.53278	0.616151	6.85823e-07	1.09258e-05
Y18H1A.6		934.635		1135.36	733.91	0.646412	-0.629474	6.87328e-07	1.09418e-05
T16H12.9		85.4574		46.1892	124.726	2.70032	1.43313	6.90837e-07	1.09897e-05
Y4C6B.2		222.268		132.325	312.211	2.35943	1.23844	6.93108e-07	1.10178e-05
C01G12.8		1313.93		737.135	1890.73	2.56497	1.35894	6.97628e-07	1.10816e-05
B0285.1		2964.37		3683.89	2244.85	0.609369	-0.714612	6.98916e-07	1.1094e-05
F44A6.1		1337.29		1605.99	1068.6	0.665383	-0.587743	7.07945e-07	1.12292e-05
K07A3.3		310.012		168.781	451.242	2.67354	1.41875	7.20058e-07	1.14131e-05
C34B2.3		119.398		59.9416	178.854	2.9838	1.57715	7.24555e-07	1.14595e-05
F48B9.4		192.441		127.971	256.911	2.00756	1.00545	7.23743e-07	1.14595e-05
R06B9.4		373.131		272.785	473.478	1.73572	0.795531	7.24476e-07	1.14595e-05
K06H7.8		92.2655		47.282	137.249	2.90278	1.53743	7.25508e-07	1.14663e-05
ZK892.1		1003.64		782.222	1225.05	1.56612	0.647192	7.32042e-07	1.15529e-05
F54B3.3		5092.6		6147.46	4037.73	0.656813	-0.606446	7.34421e-07	1.15821e-05
ZK353.4		85.0541		42.8065	127.302	2.97389	1.57235	7.36684e-07	1.1601e-05
B0513.9		122.332		73.3906	171.272	2.33371	1.22263	7.36187e-07	1.1601e-05
Y54E2A.7		154.035		75.5134	232.557	3.07968	1.62278	7.42185e-07	1.16709e-05
Y59H11AM.4		36.8778		12.6893	61.0664	4.81244	2.26677	7.42875e-07	1.16711e-05
F25H5.8		624.57		438.702	810.438	1.84735	0.885459	7.43264e-07	1.16711e-05
R09A8.2		829.583		1011.48	647.688	0.640337	-0.643096	7.44227e-07	1.16779e-05
C40H1.4		85.8094		45.9853	125.633	2.73203	1.44998	7.46651e-07	1.16991e-05
F39E9.11		86.7567		48.338	125.175	2.58958	1.37272	7.48375e-07	1.17178e-05
C05C12.4		484.388		363.563	605.213	1.66467	0.735236	7.52542e-07	1.17662e-05
T28B8.3		61.2618		28.8502	93.6735	3.2469	1.69906	7.69376e-07	1.20122e-05
K08E3.10		615.514		469.586	761.441	1.62151	0.697341	7.71836e-07	1.20421e-05
D1081.7		11762.1		14555	8969.17	0.616227	-0.698466	7.75294e-07	1.20874e-05
ZK131.11		543.288		409.815	676.761	1.65138	0.723671	7.84276e-07	1.22187e-05
F28H1.5		65.0519		31.2361	98.8678	3.16518	1.66229	7.89626e-07	1.22934e-05
ZK418.2		175.162		79.3442	270.981	3.41526	1.77199	7.90508e-07	1.22984e-05
F25H5.7		142.872		84.5237	201.219	2.38063	1.25134	7.92761e-07	1.23159e-05
F31F4.12		126.731		76.8658	176.597	2.29747	1.20005	7.99586e-07	1.24087e-05
Y106G6A.4		829.851		563.924	1095.78	1.94313	0.958383	8.20598e-07	1.27033e-05
W01F3.2		1950.22		1445.14	2455.29	1.699	0.764683	8.21385e-07	1.27065e-05
Y57A10B.7		74.9622		37.9197	112.005	2.95374	1.56254	8.32767e-07	1.28463e-05
W02A2.8		127.117		76.573	177.66	2.32014	1.21421	8.34117e-07	1.28497e-05
F55H12.2		765.529		594.516	936.542	1.5753	0.655627	8.34747e-07	1.28497e-05
F54D1.1		237.926		128.067	347.785	2.71564	1.44129	8.37122e-07	1.28772e-05
F55B11.5		59.4272		27.7905	91.0638	3.27679	1.71228	8.46728e-07	1.30158e-05
ZK1248.5		238.753		108.783	368.722	3.38951	1.76108	8.50106e-07	1.30495e-05
K10H10.10		15.3143		1.08924	29.5393	27.1191	4.76124	8.51133e-07	1.30561e-05
Y54F10BM.15		87.2191		47.8971	126.541	2.64194	1.4016	8.55548e-07	1.31054e-05
C01G6.1		1855		1467.72	2242.28	1.52773	0.611387	8.57502e-07	1.31262e-05
ZK783.6		58.8153		24.2597	93.3709	3.84881	1.94441	8.61637e-07	1.31803e-05
T21D12.12		440.4		328.596	552.203	1.68049	0.748883	8.65013e-07	1.32227e-05
ZK1010.9		63.801		30.5581	97.0439	3.17572	1.66708	8.76491e-07	1.33888e-05
H35B03.2		1252.58		1507.81	997.343	0.66145	-0.596296	8.77908e-07	1.34011e-05
C27D8.3		858.569		1048.58	668.562	0.63759	-0.649299	8.80867e-07	1.34369e-05
F18A11.5		117.496		71.2714	163.721	2.29714	1.19984	8.83303e-07	1.34573e-05
T27F2.2		618.913		471.195	766.631	1.62699	0.702209	8.83433e-07	1.34573e-05
F09G2.3		274.021		161.004	387.037	2.40389	1.26537	8.9921e-07	1.36881e-05
T16A1.2		99.5574		48.4008	150.714	3.11387	1.63871	9.05262e-07	1.37707e-05
C26E1.3		191.327		128.294	254.36	1.98264	0.98742	9.0882e-07	1.38152e-05
ZK970.1		281.302		199.447	363.158	1.82083	0.864595	9.10258e-07	1.38275e-05
C05D9.3		852.518		661.853	1043.18	1.57616	0.656412	9.12324e-07	1.38396e-05
Y39G10AR.15		154.442		82.7861	226.098	2.73111	1.44949	9.18797e-07	1.39216e-05
F53A9.7		109.906		55.6664	164.145	2.94873	1.56009	9.36972e-07	1.41506e-05
C07H6.8		1516.01		1817.51	1214.52	0.66823	-0.581583	9.36409e-07	1.41506e-05
Y73C8B.3		543.434		412.057	674.811	1.63766	0.71164	9.39734e-07	1.41769e-05
B0511.11		950.597		741.831	1159.36	1.56284	0.644169	9.43808e-07	1.42286e-05
T05D4.5		241.598		164.009	319.188	1.94616	0.96063	9.47074e-07	1.4268e-05
C07A4.3		43.2039		16.9574	69.4503	4.09559	2.03407	9.51543e-07	1.43156e-05
C01G6.2		63.6203		30.0579	97.1826	3.23318	1.69295	9.55683e-07	1.43584e-05
B0273.1		298.016		191.744	404.288	2.10848	1.0762	9.55699e-07	1.43584e-05
Y38C1AA.7		2150.84		1338.36	2963.31	2.21414	1.14674	9.76648e-07	1.4643e-05
C01G12.9		65.191		31.8251	98.5568	3.09682	1.63079	9.80742e-07	1.46944e-05
K03H1.1		705.407		402.456	1008.36	2.50551	1.3251	9.82492e-07	1.47105e-05
R11G1.6		802.283		624.545	980.021	1.56918	0.650007	9.87933e-07	1.47742e-05
T23D8.5		93.9391		134.477	53.401	0.397101	-1.33242	9.94188e-07	1.4845e-05
C37C3.12		93.266		53.725	132.807	2.47198	1.30567	9.95039e-07	1.48476e-05
Y39A1A.2		85.1878		46.5744	123.801	2.65814	1.41042	9.98875e-07	1.48947e-05
B0336.7		910.706		1100.72	720.694	0.654748	-0.610988	1.00026e-06	1.49052e-05
F41H10.2		686.772		441.84	931.705	2.10869	1.07635	1.01888e-06	1.51414e-05
Y18H1A.1		359.12		232.638	485.602	2.08737	1.06168	1.02185e-06	1.51753e-05
B0252.5		289.227		166.102	412.353	2.48253	1.31181	1.02834e-06	1.5251e-05
F59E12.9		6333.89		7606.43	5061.35	0.665403	-0.587699	1.03449e-06	1.53318e-05
T07H3.3		133.237		35.6819	230.792	6.46804	2.69333	1.03851e-06	1.53811e-05
C35A5.2		70.7535		32.381	109.126	3.37006	1.75278	1.04632e-06	1.54863e-05
H30A04.1		683.387		830.171	536.603	0.646377	-0.629553	1.04721e-06	1.5489e-05
W05E7.1		2797.2		3397.15	2197.25	0.646791	-0.628629	1.05319e-06	1.55564e-05
Y41C4A.7		39.3117		14.8085	63.8148	4.30933	2.10747	1.06288e-06	1.56573e-05
F13C5.6		685.049		528.873	841.225	1.5906	0.669572	1.06694e-06	1.5696e-05
F55C5.3		205.683		138.275	273.09	1.97498	0.981841	1.09101e-06	1.60394e-05
Y47G6A.33		1456.69		1749.43	1163.95	0.665333	-0.587851	1.09844e-06	1.61377e-05
ZK930.2		607.213		403.609	810.816	2.00891	1.00641	1.10355e-06	1.6202e-05
Y39B6A.18		104.494		45.0442	163.943	3.63961	1.86378	1.10768e-06	1.62517e-05
R05D7.1		171.282		114.137	228.426	2.00133	1.00096	1.11439e-06	1.63282e-05
Y50D4C.4		2253.04		2731.64	1774.43	0.649585	-0.62241	1.12169e-06	1.64242e-05
E03H12.5		584.657		358.28	811.034	2.26369	1.17868	1.12523e-06	1.6465e-05
C35D10.3		53.3181		24.1708	82.4655	3.41178	1.77053	1.12679e-06	1.64658e-05
C34E11.3		629.673		481.706	777.641	1.61435	0.690954	1.12629e-06	1.64658e-05
ZK1251.5		30.0806		8.27304	51.8881	6.27196	2.64892	1.13394e-06	1.65483e-05
C53B7.7		230.161		158.352	301.97	1.90696	0.931273	1.14041e-06	1.66317e-05
C26E6.9		4229.25		5137.61	3320.88	0.646386	-0.629531	1.14221e-06	1.66468e-05
T08G3.7		64.3522		31.2361	97.4683	3.12038	1.64172	1.14697e-06	1.66939e-05
R11E3.2		71.3659		103.712	39.0201	0.376236	-1.41029	1.14684e-06	1.66939e-05
F15B9.9		26.7069		5.97603	47.4377	7.938	2.98878	1.16196e-06	1.68561e-05
Y18H1A.11		131.823		82.4602	181.186	2.19726	1.1357	1.1617e-06	1.68561e-05
Y57A10A.18		17331.1		21046	13616.3	0.646977	-0.628214	1.16061e-06	1.68561e-05
F36A2.13		15537.2		19006.5	12067.9	0.634938	-0.655313	1.16887e-06	1.69228e-05
H11E01.3		731.497		565.288	897.707	1.58805	0.667258	1.17076e-06	1.69389e-05
F47H4.2		72.2778		37.1232	107.432	2.89394	1.53304	1.181e-06	1.70758e-05
F23H11.8		136.495		85.5205	187.469	2.19209	1.13231	1.19144e-06	1.72153e-05
F22A3.5		329.334		239.196	419.472	1.75367	0.810377	1.19622e-06	1.72617e-05
F59E11.7		39.8405		14.6307	65.0503	4.44615	2.15256	1.20171e-06	1.73181e-05
ZC581.10		78.8354		41.5098	116.161	2.7984	1.4846	1.20098e-06	1.73181e-05
Y71G12B.4		850.99		662.902	1039.08	1.56747	0.648438	1.20642e-06	1.73746e-05
C03C10.2		96.5175		45.0442	147.991	3.28545	1.71609	1.22276e-06	1.75866e-05
Y73B6BR.1		675.656		521.833	829.479	1.58955	0.668617	1.22935e-06	1.76699e-05
F10D11.3		61.0397		29.0279	93.0515	3.20558	1.68059	1.23397e-06	1.77131e-05
Y69F12A.1		80.3605		38.4495	122.271	3.18005	1.66905	1.23773e-06	1.77554e-05
F08H9.6		273.934		164.887	382.981	2.32269	1.2158	1.24241e-06	1.78108e-05
R102.3		52.5184		20.4029	84.634	4.14814	2.05246	1.24552e-06	1.78438e-05
C34H3.2		103.771		60.9088	146.633	2.40742	1.26749	1.25863e-06	1.80198e-05
C08F11.14		113.455		36.8897	190.02	5.15102	2.36486	1.26616e-06	1.81157e-05
K10D11.6		105.418		62.2315	148.604	2.38793	1.25576	1.26941e-06	1.81504e-05
F07F6.5		42.3731		3.82717	80.9189	21.1433	4.40213	1.28015e-06	1.82801e-05
M05B5.2		408.7		304.133	513.267	1.68764	0.755009	1.29106e-06	1.84239e-05
ZK1307.3		60.7324		28.8798	92.5851	3.20588	1.68072	1.29234e-06	1.84301e-05
D2063.4		116.225		67.4774	164.973	2.44486	1.28975	1.30175e-06	1.85523e-05
Y38H8A.3		899.1		314.157	1484.04	4.72388	2.23997	1.30687e-06	1.8601e-05
K01H12.4		411.298		242.178	580.419	2.39666	1.26102	1.30912e-06	1.86089e-05
C36C9.1		1138.66		1374.65	902.67	0.656653	-0.606798	1.30908e-06	1.86089e-05
C06E1.1		112.718		156.877	68.5594	0.437026	-1.19421	1.31547e-06	1.8687e-05
K07C5.4		15631.6		19302.3	11960.9	0.619661	-0.690449	1.32365e-06	1.8791e-05
ZC443.3		534.425		340.949	727.901	2.13493	1.09419	1.32849e-06	1.88475e-05
C17D12.6		66.4492		32.2068	100.692	3.12641	1.64451	1.3388e-06	1.89693e-05
C07H6.3		1056.44		834.187	1278.69	1.53285	0.616221	1.34343e-06	1.90198e-05
T12B3.3		731.688		564.607	898.77	1.59185	0.670706	1.37573e-06	1.94296e-05
F52B10.1		15954.7		12394.7	19514.7	1.57445	0.654845	1.38207e-06	1.95066e-05
F32B6.5		1237.21		827.565	1646.85	1.98999	0.992762	1.38636e-06	1.95545e-05
C06A5.2		69.5414		35.004	104.079	2.97334	1.57209	1.39143e-06	1.96008e-05
ZK546.15		900.149		1087.49	712.805	0.655458	-0.609425	1.39095e-06	1.96008e-05
M176.9		208.747		103.426	314.069	3.03665	1.60248	1.4086e-06	1.98045e-05
C05D12.3		1918.45		1534.37	2302.52	1.50063	0.585572	1.40841e-06	1.98045e-05
Y51H4A.25		120.904		69.6524	172.155	2.47163	1.30546	1.41679e-06	1.98941e-05
F08D12.3		207.423		142.424	272.422	1.91275	0.935649	1.42967e-06	2.00621e-05
DC2.5		299.746		409.741	189.751	0.4631	-1.11061	1.43756e-06	2.0147e-05
Y51H1A.6		2840.29		3489.82	2190.76	0.627757	-0.671722	1.43705e-06	2.0147e-05
F46F5.11		24.385		5.00531	43.7647	8.74366	3.12824	1.45332e-06	2.03549e-05
ZK688.5		6919.71		8469.71	5369.71	0.63399	-0.657468	1.45531e-06	2.03697e-05
M151.7		261.542		335.132	187.952	0.560831	-0.834362	1.46141e-06	2.0442e-05
F13H8.1		84.0591		37.0047	131.113	3.54316	1.82504	1.46532e-06	2.04836e-05
C16A11.7		223.182		149.026	297.339	1.99521	0.996542	1.46648e-06	2.04867e-05
Y71F9AR.1		687.94		534.671	841.208	1.57332	0.653812	1.47458e-06	2.05868e-05
T01E8.9		338.923		219.093	458.752	2.09387	1.06617	1.497e-06	2.08731e-05
F15A4.6		612.197		455.419	768.976	1.6885	0.755744	1.50554e-06	2.09656e-05
ZK1251.1		364.168		222.361	505.976	2.27547	1.18616	1.52183e-06	2.1179e-05
F58B4.5		604.66		463.992	745.328	1.60634	0.683776	1.53506e-06	2.13359e-05
Y73B6BL.31		691.374		844.039	538.709	0.638251	-0.647803	1.53679e-06	2.13465e-05
Y39F10A.3		23.6096		4.97568	42.2434	8.48999	3.08576	1.56504e-06	2.17113e-05
F59A1.15		106.23		63.5614	148.898	2.34259	1.22811	1.56859e-06	2.17468e-05
F27E11.2		56.2241		26.6124	85.8359	3.22541	1.68948	1.59498e-06	2.20708e-05
T02E1.7		152.542		58.2929	246.791	4.23364	2.0819	1.60101e-06	2.21263e-05
K07F5.8		28.4223		8.65469	48.1899	5.56807	2.47718	1.60277e-06	2.21366e-05
C04A11.2		75.0186		106.861	43.1764	0.404043	-1.30742	1.61776e-06	2.23296e-05
Y37E11B.10		753.338		456.856	1049.82	2.29792	1.20033	1.62507e-06	2.24023e-05
Y45F3A.1		198.131		133.01	263.252	1.97919	0.984913	1.64694e-06	2.26894e-05
T23F11.2		162.203		88.9103	235.495	2.64868	1.40527	1.65283e-06	2.27563e-05
C50E3.13		726.512		879.888	573.136	0.651374	-0.618443	1.65846e-06	2.28195e-05
T22B3.3		440.633		247.736	633.53	2.55728	1.35461	1.67895e-06	2.30724e-05
R08F11.1		710.702		865.327	556.078	0.642622	-0.637959	1.67867e-06	2.30724e-05
T14B4.7		168.471		238.508	98.4349	0.412712	-1.27679	1.7115e-06	2.34903e-05
C54D1.1		143.314		91.6411	194.987	2.12773	1.08931	1.71634e-06	2.3542e-05
Y116A8C.33		262.572		181.733	343.411	1.88964	0.918114	1.71871e-06	2.35597e-05
F42G2.6		170.204		230.824	109.584	0.474752	-1.07475	1.72126e-06	2.35799e-05
F33D11.8		58.3703		27.8202	88.9205	3.19626	1.67638	1.72734e-06	2.36115e-05
ZK1058.6		135.053		223.732	46.3745	0.207277	-2.27037	1.72731e-06	2.36115e-05
Y39G10AR.16		197.734		121.647	273.822	2.25095	1.17054	1.75389e-06	2.39371e-05
Y37F4.1		72.595		35.1225	110.067	3.13382	1.64792	1.76308e-06	2.40474e-05
F26D12.1		758.681		553.996	963.366	1.73894	0.798208	1.77163e-06	2.4134e-05
F40F12.8		30.7736		8.15452	53.3926	6.54761	2.71097	1.78049e-06	2.42396e-05
T05B4.2		106.209		147.989	64.4284	0.435359	-1.19972	1.79298e-06	2.43945e-05
T06D4.4		84.021		45.926	122.116	2.65897	1.41087	1.8038e-06	2.45266e-05
C42D4.8		5575.36		6691.91	4458.81	0.666299	-0.585757	1.83655e-06	2.49508e-05
F43D2.6		798.795		623.285	974.305	1.56318	0.644483	1.84693e-06	2.50663e-05
Y69A2AR.8		49.8392		20.8438	78.8345	3.78216	1.91921	1.85131e-06	2.51102e-05
C25G4.8		100.55		58.6153	142.485	2.43086	1.28146	1.88307e-06	2.55252e-05
B0280.17		460.186		271.618	648.755	2.38849	1.2561	1.88508e-06	2.55366e-05
F36D1.7		72.8512		31.5881	114.114	3.61258	1.85303	1.89134e-06	2.55898e-05
H19J13.1		12.5993		0.559438	24.6392	44.0428	5.46083	1.8962e-06	2.56396e-05
C32C4.3		58.3953		24.8191	91.9715	3.70567	1.88973	1.92629e-06	2.60144e-05
C55C3.3		415.423		521.84	309.005	0.592144	-0.755979	1.95789e-06	2.63924e-05
W01D2.3		93.7841		50.1384	137.43	2.74101	1.45471	1.96564e-06	2.64806e-05
K01A2.10		153.698		100.033	207.363	2.07296	1.05169	1.97901e-06	2.66443e-05
C39H7.4		562.451		420.678	704.224	1.67402	0.743317	1.98194e-06	2.66673e-05
W04E12.4		31.0204		9.39192	52.6488	5.60576	2.48691	2.00593e-06	2.69404e-05
K04C2.8		84.023		46.3966	121.649	2.62195	1.39064	2.00541e-06	2.69404e-05
F41E6.11		29.3462		6.03529	52.6572	8.72488	3.12514	2.01053e-06	2.69692e-05
C06G4.4		100.959		59.2933	142.624	2.4054	1.26628	2.00955e-06	2.69692e-05
F10D7.3		452.358		340.459	564.256	1.65734	0.728867	2.04104e-06	2.7345e-05
T10H4.11		50.1731		22.7556	77.5906	3.40973	1.76966	2.04279e-06	2.73516e-05
Y73B6A.1		62.1244		30.1172	94.1316	3.12551	1.64409	2.05376e-06	2.74817e-05
F44F1.1		19.171		3.29736	35.0446	10.6281	3.40981	2.06859e-06	2.76633e-05
C33C12.7		72.0239		37.2121	106.836	2.87099	1.52155	2.07981e-06	2.77794e-05
Y57G11B.7		94.0412		41.3356	146.747	3.55013	1.82787	2.08441e-06	2.78239e-05
C08B6.3		173.906		116.079	231.734	1.99635	0.997366	2.09905e-06	2.79852e-05
Y48E1A.1		2528.13		3145.03	1911.23	0.607699	-0.718572	2.10987e-06	2.80952e-05
W04E12.5		49.3747		21.3143	77.4351	3.633	1.86116	2.12144e-06	2.8215e-05
ZK250.6		60.8371		28.7613	92.9129	3.23049	1.69175	2.14481e-06	2.84568e-05
F33H2.5		7095.44		8734.96	5455.92	0.624608	-0.678978	2.16397e-06	2.86762e-05
F36A2.14		307.67		186.975	428.364	2.29102	1.19599	2.182e-06	2.88976e-05
Y43H11AL.3		8691.27		10503.7	6878.81	0.654893	-0.610669	2.20219e-06	2.91298e-05
T01C3.7		15706.5		20414.5	10998.5	0.538758	-0.892291	2.21666e-06	2.93036e-05
C53D5.6		23693.7		29474.3	17913.2	0.607757	-0.718433	2.22827e-06	2.94214e-05
C44E4.7		2630.11		3287.65	1972.57	0.599992	-0.736985	2.23967e-06	2.95543e-05
Y11D7A.14		134.743		86.2873	183.199	2.12313	1.08619	2.26503e-06	2.98349e-05
AH6.2		153.426		87.4951	219.357	2.50708	1.32601	2.26963e-06	2.98776e-05
Y116A8C.23		151.201		71.512	230.889	3.22867	1.69094	2.27195e-06	2.9885e-05
F54C4.3		2107.58		2595.4	1619.77	0.624095	-0.680161	2.27365e-06	2.9885e-05
F22B5.4		168.227		112.133	224.321	2.00049	1.00035	2.28242e-06	2.99208e-05
ZC443.4		193.064		132.088	254.041	1.92327	0.943562	2.28238e-06	2.99208e-05
F31E8.5		308.219		177.261	439.177	2.47757	1.30893	2.29172e-06	3.0024e-05
Y11D7A.13		842.831		1055.39	630.273	0.597194	-0.743728	2.30071e-06	3.01238e-05
F47G6.3		82.1966		37.3602	127.033	3.40021	1.76563	2.33279e-06	3.04891e-05
Y82E9BR.12		25.6102		7.00601	44.2144	6.31092	2.65785	2.34316e-06	3.06051e-05
F26A1.4		31.573		9.89209	53.254	5.38349	2.42854	2.34586e-06	3.06051e-05
K07H8.10		31054.2		39615.8	22492.7	0.56777	-0.816621	2.34489e-06	3.06051e-05
F54D1.4		184.941		125.2	244.682	1.95432	0.966668	2.34951e-06	3.06345e-05
Y54G2A.52		190.662		131.621	249.704	1.89714	0.923829	2.35525e-06	3.06728e-05
R10E4.7		526.959		336.646	717.273	2.13064	1.09129	2.35817e-06	3.06926e-05
F15D4.8		300.157		218.349	381.964	1.74933	0.806802	2.36198e-06	3.07204e-05
Y47H9B.2		117.643		71.2453	164.04	2.30247	1.20318	2.36961e-06	3.07867e-05
F01D4.4		2346.85		1838.7	2855.01	1.55273	0.634812	2.39999e-06	3.11629e-05
D1086.5		223.629		153.732	293.527	1.90935	0.93308	2.41321e-06	3.12974e-05
Y6E2A.10		105.967		56.0256	155.908	2.7828	1.47654	2.44265e-06	3.16605e-05
B0302.5		647.847		504.991	790.703	1.56578	0.646878	2.48415e-06	3.21414e-05
F58A3.5		621.511		481.124	761.899	1.58358	0.663192	2.50424e-06	3.23631e-05
ZC412.10		356.098		243.85	468.346	1.92064	0.941584	2.51849e-06	3.24897e-05
F54A3.6		1089.24		1308.69	869.794	0.664628	-0.589382	2.518e-06	3.24897e-05
Y11D7A.10		1000.85		1209.3	792.396	0.655253	-0.609876	2.53757e-06	3.26973e-05
Y37D8A.16		309.868		227.063	392.672	1.72935	0.790233	2.56434e-06	3.2984e-05
ZC373.4		1031.62		819.612	1243.63	1.51735	0.60155	2.62582e-06	3.37074e-05
F22D6.10		192.281		40.0721	344.491	8.59677	3.1038	2.64391e-06	3.38485e-05
F36H12.4		71.9738		36.8008	107.147	2.91153	1.54178	2.64629e-06	3.38593e-05
F55G11.9		43.065		17.3983	68.7317	3.95049	1.98203	2.64969e-06	3.38632e-05
Y43B11AR.1		827.218		651.427	1003.01	1.53971	0.622657	2.64956e-06	3.38632e-05
T08G3.4		163.383		61.8866	264.879	4.28006	2.09763	2.68969e-06	3.43543e-05
C49A1.2		31.4344		10.3923	52.4765	5.04957	2.33616	2.70452e-06	3.44841e-05
C52A10.3		60.7418		90.2591	31.2245	0.345943	-1.53139	2.71044e-06	3.45241e-05
F14E5.3		97.1415		57.4668	136.816	2.38079	1.25144	2.74325e-06	3.49162e-05
Y40H4A.2		188.665		108.165	269.165	2.48848	1.31526	2.76497e-06	3.51519e-05
K08C9.1		306.619		153.179	460.059	3.0034	1.5866	2.77594e-06	3.52504e-05
C08F8.6		440.762		252.982	628.541	2.48453	1.31297	2.78231e-06	3.52969e-05
W01B6.5		141.17		78.6662	203.674	2.58909	1.37244	2.81039e-06	3.56054e-05
B0523.1		79.9254		43.3955	116.455	2.68358	1.42416	2.85708e-06	3.6155e-05
C24D10.1		240.544		137.252	343.835	2.50514	1.32489	2.90181e-06	3.66787e-05
R11E3.1		367.131		234.876	499.386	2.12617	1.08826	2.94387e-06	3.71674e-05
Y40D12A.2		955.051		755.569	1154.53	1.52803	0.611674	2.94959e-06	3.72181e-05
B0244.2		1545.75		1159.7	1931.79	1.66577	0.736187	3.032e-06	3.8214e-05
C16A11.9		57.0548		22.7852	91.3243	4.00805	2.0029	3.07305e-06	3.87091e-05
C46F9.3		75.6372		42.9511	108.323	2.52202	1.33458	3.09714e-06	3.89678e-05
R08C7.5		142.571		91.0888	194.054	2.13038	1.09111	3.10539e-06	3.90267e-05
R09B3.2		5979.33		7945.85	4012.81	0.505019	-0.985589	3.10426e-06	3.90267e-05
ZC168.6		703.06		453.088	953.032	2.10342	1.07273	3.12638e-06	3.9268e-05
K09F6.3		462.198		292.669	631.727	2.1585	1.11003	3.14517e-06	3.94587e-05
F47G6.4		2403.43		1666.93	3139.94	1.88367	0.913547	3.15199e-06	3.95216e-05
ZK682.5		33.4414		11.9521	54.9307	4.59592	2.20036	3.16062e-06	3.96072e-05
F22A3.6		13206.7		17727.1	8686.34	0.490004	-1.02913	3.18609e-06	3.98808e-05
C56E6.6		103.337		62.676	143.998	2.2975	1.20007	3.20043e-06	4.00145e-05
T08G11.2		149.372		84.1978	214.546	2.54811	1.34943	3.2e-06	4.00145e-05
Y113G7A.10		33.5134		11.6297	55.3972	4.76344	2.252	3.21859e-06	4.01867e-05
ZK1307.4		244.436		151.794	337.078	2.22063	1.15097	3.2197e-06	4.01867e-05
C12D8.14		25.1293		1.61905	48.6396	30.0421	4.90891	3.22965e-06	4.02649e-05
F59C6.14		93.5695		53.962	133.177	2.46797	1.30333	3.22924e-06	4.02649e-05
ZC47.3		49.844		23.9634	75.7247	3.16002	1.65993	3.23395e-06	4.02956e-05
T10C6.15		80.7953		30.4099	131.181	4.31374	2.10894	3.23586e-06	4.02964e-05
ZK265.1		80.1307		45.1888	115.073	2.54648	1.34851	3.24226e-06	4.03532e-05
F37C12.18		186.432		102.896	269.968	2.62369	1.3916	3.26398e-06	4.06005e-05
C44E4.2		722.844		914.606	531.081	0.580667	-0.784218	3.27677e-06	4.07365e-05
Y57G11C.15		34365.9		42684.8	26047	0.610217	-0.712606	3.30792e-06	4.10538e-05
Y22D7AL.5		15321.6		18792.9	11850.2	0.630572	-0.665268	3.32296e-06	4.11937e-05
F43C9.1		118.343		74.3317	162.355	2.18419	1.1271	3.35915e-06	4.15954e-05
B0379.2		91.6698		52.4615	130.878	2.49475	1.31889	3.40185e-06	4.20815e-05
F56D5.6		542.03		418.5	665.561	1.59035	0.669344	3.40225e-06	4.20815e-05
F25F2.2		2445		3180.65	1709.35	0.53742	-0.895878	3.49621e-06	4.31219e-05
C01F6.2		259.693		130.568	388.819	2.97789	1.57429	3.52655e-06	4.34717e-05
F35E2.6		48.6843		22.5517	74.8169	3.31757	1.73013	3.56754e-06	4.39028e-05
F46B3.4		108.376		45.4259	171.327	3.77158	1.91517	3.57586e-06	4.39406e-05
T13A10.1		29.0469		9.27339	48.8203	5.26456	2.39631	3.60931e-06	4.42924e-05
E03H12.7		219.955		129.686	310.224	2.39211	1.25828	3.66575e-06	4.49095e-05
ZK742.4		214.148		151.171	277.125	1.83318	0.87435	3.6712e-06	4.4926e-05
Y48G9A.9		719.78		565.426	874.135	1.54598	0.628518	3.73639e-06	4.56983e-05
C44E4.1		8186.53		9994.38	6378.68	0.638227	-0.647859	3.77146e-06	4.61014e-05
F49E11.7		76.9078		39.3313	114.484	2.91077	1.5414	3.77944e-06	4.61732e-05
M70.1		195.807		131.48	260.134	1.97851	0.984415	3.82149e-06	4.6609e-05
C29F7.6		81.596		46.8671	116.325	2.48202	1.31151	3.83446e-06	4.67411e-05
F21C3.7		84.807		34.0333	135.581	3.98377	1.99414	3.86523e-06	4.70377e-05
Y77E11A.10		514.931		321.549	708.313	2.20282	1.13935	3.89033e-06	4.72644e-05
T10C6.7		738.955		895.437	582.474	0.650491	-0.620399	3.89282e-06	4.72684e-05
F32B6.10		109.155		66.0326	152.277	2.30609	1.20545	3.93174e-06	4.76618e-05
D1007.7		4021.95		4858.9	3185	0.655498	-0.609336	3.93638e-06	4.76916e-05
C27H6.2		4637.71		5627.39	3648.03	0.648262	-0.62535	3.9849e-06	4.81728e-05
F13D11.3		189.091		130.294	247.888	1.90252	0.927913	4.02854e-06	4.86467e-05
T08A9.2		256.173		170.007	342.339	2.01367	1.00983	4.08842e-06	4.93426e-05
Y53C10A.10		196.474		135.718	257.23	1.89533	0.922446	4.10215e-06	4.94811e-05
Y87G2A.20		89.394		46.4559	132.332	2.84856	1.51023	4.11129e-06	4.9564e-05
C44H9.5		370.651		279.491	461.812	1.65233	0.724501	4.11766e-06	4.96135e-05
C33F10.12		295		183.208	406.793	2.22039	1.15081	4.12212e-06	4.96399e-05
F56E10.1		858.165		1029.01	687.317	0.667938	-0.582214	4.16826e-06	5.0168e-05
C41A3.1		677.648		925.112	430.184	0.465007	-1.10468	4.21447e-06	5.06407e-05
ZK1236.3		1064.98		1301.47	828.483	0.636575	-0.651598	4.22112e-06	5.06928e-05
F55C5.1		594.511		397.618	791.405	1.99036	0.993032	4.24512e-06	5.09419e-05
T21G5.4		693.689		483.583	903.796	1.86896	0.902234	4.24651e-06	5.09419e-05
C50H2.7		33.9842		12.1298	55.8385	4.6034	2.2027	4.29224e-06	5.1406e-05
F37B1.1		110.835		67.3885	154.282	2.28944	1.19499	4.3115e-06	5.16084e-05
B0261.5		45.6384		20.7549	70.522	3.39785	1.76462	4.35406e-06	5.2061e-05
F54C8.2		882.544		1066.23	698.861	0.655454	-0.609434	4.3525e-06	5.2061e-05
T13G4.3		197.072		135.948	258.197	1.89923	0.925415	4.40803e-06	5.25915e-05
C45B2.2		209.903		144.195	275.612	1.91138	0.934616	4.41441e-06	5.26388e-05
F25F2.1		244.84		143.58	346.1	2.41051	1.26934	4.42447e-06	5.27302e-05
F59C6.3		62.806		31.8251	93.787	2.94695	1.55922	4.48007e-06	5.33348e-05
T07H3.6		22.7043		6.53547	38.873	5.94801	2.57241	4.48357e-06	5.33392e-05
H34I24.2		3581.98		2733.08	4430.88	1.6212	0.697065	4.48531e-06	5.33392e-05
F30B5.4		744.942		1029.99	459.9	0.446511	-1.16323	4.51341e-06	5.36151e-05
F40F9.3		322.954		221.242	424.666	1.91946	0.940701	4.51839e-06	5.36452e-05
M163.8		222.601		156.436	288.766	1.8459	0.884324	4.53303e-06	5.37899e-05
T11A5.6		111.293		68.7705	153.815	2.23665	1.16134	4.55209e-06	5.39868e-05
F36H12.14		50.2195		14.8974	85.5417	5.74205	2.52157	4.63132e-06	5.4867e-05
C56C10.6		50.4413		23.6114	77.2712	3.27263	1.71045	4.64831e-06	5.50385e-05
F25F8.2		286.908		210.25	363.566	1.72921	0.790109	4.65291e-06	5.50632e-05
F57B10.9		499.088		610.147	388.029	0.635959	-0.652995	4.70207e-06	5.5615e-05
F38A1.10		58.4461		29.8209	87.0714	2.91981	1.54588	4.74047e-06	5.6006e-05
Y43E12A.2		566.223		440.259	692.188	1.57223	0.652813	4.74281e-06	5.6006e-05
F14F9.8		30.1131		6.50583	53.7204	8.25727	3.04566	4.75213e-06	5.60859e-05
Y38C1AA.5		90.0776		52.5172	127.638	2.4304	1.2812	4.77728e-06	5.63221e-05
W08D2.8		106.399		60.3825	152.416	2.52417	1.33581	4.82423e-06	5.68144e-05
B0391.10		273.59		348.996	198.185	0.567873	-0.816359	4.84182e-06	5.69909e-05
M199.5		2501.44		3689.54	1313.35	0.355967	-1.49018	4.88479e-06	5.74349e-05
R06B9.6		785.3		947.135	623.465	0.658264	-0.603263	4.91721e-06	5.77851e-05
T06C12.10		159.094		56.3444	261.845	4.64722	2.21637	4.93058e-06	5.79112e-05
C16C10.3		22397.9		28109.5	16686.3	0.593618	-0.752394	4.95017e-06	5.81101e-05
F41G4.8		131.816		85.0464	178.585	2.09985	1.07029	5.05818e-06	5.92193e-05
H32C10.3		81.0292		37.6269	124.432	3.30698	1.72551	5.06394e-06	5.92552e-05
C33A12.4		139.887		91.6743	188.099	2.05182	1.0369	5.0987e-06	5.95982e-05
C05E7.1		61.8974		31.0879	92.7069	2.98209	1.57632	5.131e-06	5.99118e-05
Y119D3B.17		537.1		402.839	671.36	1.66657	0.736884	5.15086e-06	6.01117e-05
E01B7.1		1185.27		1423.46	947.073	0.665331	-0.587855	5.15587e-06	6.0138e-05
C47A10.5		244.085		175.543	312.627	1.78092	0.832624	5.18038e-06	6.03918e-05
F26G5.1		1096.4		1314.9	877.9	0.667654	-0.582828	5.21304e-06	6.07403e-05
D1044.7		78.1039		43.392	112.816	2.59992	1.37847	5.25599e-06	6.11756e-05
F31E8.2		306.479		224.177	388.781	1.73426	0.794319	5.27421e-06	6.13236e-05
T26C12.6		339.529		252.82	426.238	1.68594	0.753549	5.27431e-06	6.13236e-05
C07A12.3		284.161		207.575	360.746	1.73791	0.79735	5.28312e-06	6.13935e-05
ZC443.1		245.575		168.003	323.146	1.92345	0.943699	5.3001e-06	6.15582e-05
C35E7.10		192.057		121.795	262.319	2.15378	1.10687	5.33762e-06	6.1961e-05
C38H2.2		601.393		470.876	731.91	1.55436	0.636319	5.37881e-06	6.24061e-05
H23L24.2		63.3085		26.4085	100.208	3.79454	1.92393	5.38466e-06	6.2441e-05
F19C7.6		23.7527		6.50583	40.9995	6.30196	2.6558	5.44788e-06	6.30739e-05
Y38H8A.4		231.533		137.163	325.903	2.37603	1.24855	5.47665e-06	6.33735e-05
F45D11.9		198.453		259.355	137.552	0.53036	-0.914955	5.52689e-06	6.38872e-05
F40G9.17		537.337		675.542	399.132	0.590831	-0.759182	5.55312e-06	6.41229e-05
C26E6.1		38.534		15.2494	61.8186	4.05383	2.01929	5.57318e-06	6.43206e-05
K10G9.1		886.647		706.946	1066.35	1.50839	0.593008	5.60425e-06	6.46451e-05
W07E6.3		51.9838		25.1415	78.8261	3.1353	1.6486	5.68654e-06	6.55253e-05
F32D8.7		40.043		15.3383	64.7478	4.22131	2.07769	5.69854e-06	6.55602e-05
T20C7.2		109.104		67.9444	150.264	2.21158	1.14507	5.69818e-06	6.55602e-05
Y57G11C.23		207.893		127.419	288.366	2.26313	1.17832	5.7819e-06	6.64145e-05
F59B10.1		545.296		663.724	426.868	0.64314	-0.636794	5.81208e-06	6.66563e-05
ZC250.4		245.428		358.187	132.668	0.370389	-1.43289	5.8191e-06	6.67019e-05
C01G5.3		78.5796		35.6819	121.477	3.40444	1.76742	5.84358e-06	6.68787e-05
T09A5.1		315.709		224.588	406.83	1.81145	0.857146	5.84368e-06	6.68787e-05
F53B2.8		907.872		541.296	1274.45	2.35444	1.23538	5.84367e-06	6.68787e-05
F36F2.1		272.635		198.654	346.617	1.74483	0.803087	5.86032e-06	6.70341e-05
C50C3.9		431.695		327.388	536.002	1.63721	0.711236	5.87696e-06	6.71893e-05
ZK1067.2		5341.46		6421.39	4261.52	0.663644	-0.591519	5.91513e-06	6.75904e-05
F59E11.12		168.713		114.782	222.644	1.93971	0.955841	5.96241e-06	6.80597e-05
R09D1.10		214.715		138.797	290.632	2.09393	1.06621	5.97226e-06	6.81366e-05
Y47D3A.11		217.861		121.532	314.191	2.58525	1.37031	6.01272e-06	6.84998e-05
F38A1.5		380.248		196.853	563.642	2.86326	1.51766	6.01347e-06	6.84998e-05
C29E4.14		40.0599		15.8385	64.2813	4.05855	2.02096	6.08646e-06	6.92591e-05
C07D10.4		161.172		107.513	214.831	1.99819	0.998696	6.09403e-06	6.93093e-05
B0336.4		557.122		681.652	432.592	0.634622	-0.65603	6.1978e-06	7.03799e-05
Y47D9A.5		38.2574		15.4568	61.058	3.95022	1.98193	6.29868e-06	7.13037e-05
Y37E11AR.1		315.86		234.425	397.295	1.69477	0.761087	6.362e-06	7.19461e-05
C04E6.4		33.9084		12.1002	55.7166	4.6046	2.20308	6.39377e-06	7.22681e-05
K06A9.2		164.747		109.01	220.484	2.0226	1.01621	6.44154e-06	7.2658e-05
H05C05.1		3071.04		3685.42	2456.65	0.666588	-0.585133	6.49388e-06	7.31731e-05
R05A10.2		211.683		150.994	272.372	1.80386	0.851089	6.5125e-06	7.33451e-05
F47B3.7		297.96		158.625	437.294	2.75677	1.46298	6.5259e-06	7.3442e-05
F42G8.8		228.497		125.181	331.812	2.65065	1.40635	6.5441e-06	7.35321e-05
F02H6.3		635.394		771.99	498.798	0.64612	-0.630127	6.56596e-06	7.37198e-05
T14G10.8		291.894		181.644	402.145	2.21391	1.1466	6.57696e-06	7.38055e-05
F43D2.7		67.711		36.4156	99.0065	2.71879	1.44297	6.58178e-06	7.38096e-05
Y37D8A.11		2034.56		2491.68	1577.44	0.633082	-0.659536	6.60356e-06	7.39903e-05
C25F9.4		144.645		96.324	192.966	2.0033	1.00238	6.65722e-06	7.45533e-05
T05E11.2		101.878		62.0573	141.7	2.28337	1.19116	6.69594e-06	7.49487e-05
ZK1251.3		41.0401		12.1298	69.9505	5.76681	2.52777	6.7061e-06	7.50085e-05
Y67A6A.1		172.139		91.3258	252.952	2.76978	1.46977	6.78754e-06	7.57418e-05
T23E7.4		355.427		268.454	442.4	1.64795	0.720676	6.8374e-06	7.62593e-05
T20B6.2		41.7455		16.9277	66.5632	3.9322	1.97534	6.85677e-06	7.64364e-05
C35B8.4		182.339		127.178	237.5	1.86745	0.90107	6.92041e-06	7.70282e-05
T11G6.3		429.625		287.412	571.837	1.98961	0.992482	7.01014e-06	7.79873e-05
R13A5.9		277.64		202.978	352.303	1.73568	0.795497	7.01694e-06	7.79986e-05
F48C1.1		387.698		231.183	544.214	2.35404	1.23514	7.01828e-06	7.79986e-05
R09A1.2		247.372		171.4	323.344	1.88649	0.915701	7.04203e-06	7.82229e-05
F41E6.15		507.161		378.59	635.732	1.67921	0.747782	7.06434e-06	7.83516e-05
T25B9.1		791.045		629.146	952.944	1.51466	0.598997	7.07209e-06	7.83978e-05
F08G5.6		174.976		272.025	77.9268	0.286469	-1.80355	7.08061e-06	7.84129e-05
F07E5.8		87.8698		41.3356	134.404	3.25153	1.70112	7.09593e-06	7.84963e-05
Y53F4B.11		142.706		60.3233	225.09	3.73139	1.89971	7.09977e-06	7.84963e-05
B0495.10		279.407		206.045	352.77	1.7121	0.775767	7.09725e-06	7.84963e-05
C01B10.3		831.095		634.5	1027.69	1.61969	0.695713	7.10247e-06	7.84963e-05
ZK892.5		194.422		92.5301	296.313	3.20235	1.67913	7.23446e-06	7.98744e-05
F41B5.6		156.146		101.385	210.906	2.08025	1.05676	7.36952e-06	8.12836e-05
R105.1		349.832		208.175	491.49	2.36095	1.23937	7.36678e-06	8.12836e-05
Y38E10A.10		61.9736		33.6777	90.2695	2.68039	1.42245	7.37397e-06	8.12918e-05
ZK617.3		40.2767		16.4276	64.1258	3.90355	1.96479	7.39467e-06	8.13562e-05
K07A12.5		195.307		135.804	254.81	1.87631	0.907899	7.39163e-06	8.13562e-05
ZC116.2		473.121		361.314	584.928	1.61889	0.695006	7.39177e-06	8.13562e-05
C54D10.14		25.5645		2.17849	48.9506	22.47	4.48993	7.41211e-06	8.15071e-05
F45G2.2		275.922		192.618	359.225	1.86495	0.899141	7.5161e-06	8.25264e-05
T21E8.3		59.6711		91.4965	27.8457	0.304336	-1.71626	7.52416e-06	8.25735e-05
F10G8.2		20.4888		4.38661	36.5911	8.34154	3.06031	7.56036e-06	8.29292e-05
C16H3.2		2145.06		1707.7	2582.41	1.51221	0.596661	7.66e-06	8.38543e-05
T26C11.7		803.46		963.77	643.149	0.667326	-0.583536	7.68259e-06	8.40595e-05
C06A6.7		61.3806		30.6174	92.1438	3.00953	1.58954	7.72028e-06	8.43035e-05
Y54E5A.2		154.917		103.715	206.12	1.98736	0.990853	7.78615e-06	8.49803e-05
F16B3.2		23.5951		6.03529	41.155	6.81906	2.76957	7.79589e-06	8.50443e-05
F42G4.5		360.298		274.427	446.17	1.62583	0.701172	7.80971e-06	8.51526e-05
T18D3.4		9623.55		6034.79	13212.3	2.18936	1.13051	7.85321e-06	8.55418e-05
F10C1.3		174.368		103.278	245.459	2.37669	1.24895	7.89016e-06	8.58163e-05
ZK430.8		1674.15		1291.41	2056.88	1.59273	0.671506	7.99385e-06	8.69009e-05
C18H2.3		31.1556		10.5701	51.7411	4.89506	2.29133	8.02866e-06	8.72358e-05
C01G5.4		255.907		133.102	378.712	2.84527	1.50856	8.03262e-06	8.72358e-05
H08M01.2		441.653		337.34	545.967	1.61845	0.69461	8.06303e-06	8.74793e-05
Y73C8B.1		95.2913		56.6703	133.912	2.36301	1.24062	8.20692e-06	8.89083e-05
R04B5.11		31.1973		10.9813	51.4133	4.68188	2.22709	8.21632e-06	8.89575e-05
F17C11.2		284.126		209.398	358.855	1.71375	0.777153	8.23832e-06	8.90723e-05
F35H8.1		36.1068		14.69	57.5237	3.91584	1.96932	8.26189e-06	8.91668e-05
H14E04.1		96.7904		59.8492	133.732	2.23448	1.15994	8.26289e-06	8.91668e-05
F11A6.1		818.219		644.44	991.998	1.53932	0.62229	8.25705e-06	8.91668e-05
Y113G7C.1		998.84		637.947	1359.73	2.13142	1.09181	8.26335e-06	8.91668e-05
F20C5.4		190.264		132.917	247.611	1.86289	0.897543	8.31721e-06	8.97038e-05
K10H10.2		1049.47		1465.57	633.361	0.43216	-1.21036	8.35737e-06	9.00927e-05
F42E11.1		129.785		173.864	85.7056	0.492945	-1.0205	8.37784e-06	9.02689e-05
W01C9.4		196.472		116.701	276.242	2.3671	1.24312	8.44361e-06	9.09328e-05
Y108G3AL.7		6922.71		8338.27	5507.15	0.660467	-0.598442	8.60433e-06	9.25271e-05
C06E4.8		39.0387		11.8335	66.2438	5.59798	2.48491	8.70124e-06	9.34775e-05
C24D10.8		55.7928		28.4981	83.0874	2.91554	1.54376	8.72315e-06	9.3667e-05
Y92H12A.1		2774.94		3345.1	2204.77	0.659105	-0.60142	8.77817e-06	9.41654e-05
C05D11.6		48.2929		22.374	74.2118	3.31688	1.72983	8.82444e-06	9.46155e-05
T23B12.5		22.8974		6.00566	39.7892	6.62528	2.72798	8.87341e-06	9.50474e-05
E01G6.2		106.473		67.8852	145.062	2.13687	1.0955	8.91647e-06	9.5462e-05
F35C11.2		48.5054		22.963	74.0479	3.22466	1.68915	9.02252e-06	9.6456e-05
C09H10.9		87.7945		51.313	124.276	2.42192	1.27615	9.35664e-06	9.96873e-05
F58D5.8		48.6815		23.315	74.0479	3.17597	1.6672	9.37404e-06	9.98242e-05
C48B6.4		291.973		171.993	411.953	2.39518	1.26013	9.51837e-06	0.000101263
W03G9.6		75.6443		41.6876	109.601	2.6291	1.39457	9.57985e-06	0.000101867
T03F1.5		865.704		597.046	1134.36	1.89996	0.925967	9.59888e-06	0.00010202
Y71G12B.25		93.0589		128.56	57.5573	0.447706	-1.15938	9.69455e-06	0.000102987
C15F1.5		130.074		84.1385	176.009	2.09189	1.06481	9.84649e-06	0.000104348
Y43F8C.12		5435.71		6538.43	4332.99	0.662697	-0.593579	9.84639e-06	0.000104348
W03G9.5		62.1208		32.7366	91.505	2.79519	1.48295	9.86389e-06	0.000104431
B0025.5		442.687		281.421	603.952	2.14608	1.10171	9.89708e-06	0.000104652
T26C11.6		601.483		725.844	477.121	0.657333	-0.605304	9.98608e-06	0.00010547
Y71G12B.30		159.967		99.8916	220.042	2.20281	1.13935	1.00347e-05	0.000105932
ZK484.2		1461.01		1120.47	1801.55	1.60785	0.685131	1.0045e-05	0.00010599
F44G3.13		18.095		3.73828	32.4516	8.68091	3.11785	1.01075e-05	0.000106342
Y54E10BR.7		98.8382		61.1458	136.531	2.23287	1.1589	1.01384e-05	0.000106565
C32D5.6		554.365		433.957	674.773	1.55493	0.636851	1.0154e-05	0.000106576
W06D4.3		52.7264		26.3493	79.1035	3.00211	1.58598	1.03939e-05	0.000108884
C47E8.10		28.4419		8.83248	48.0513	5.44029	2.44368	1.04295e-05	0.000109206
F55F10.1		9779.4		12939.7	6619.1	0.511534	-0.967098	1.04743e-05	0.00010957
C44B7.6		178.354		123.789	232.919	1.88158	0.911948	1.0539e-05	0.000110142
F21G4.1		204.887		146.548	263.227	1.79619	0.844937	1.08089e-05	0.000112731
K04G2.4		442.349		274.912	609.786	2.21812	1.14933	1.08125e-05	0.000112731
Y38E10A.7		1594.75		1267.56	1921.95	1.51626	0.600516	1.08414e-05	0.000112979
R07B1.10		3215.44		2545.94	3884.94	1.52594	0.609696	1.1121e-05	0.000115562
W03F8.2		73.5047		42.0396	104.97	2.49693	1.32015	1.11415e-05	0.000115649
R07G3.2		239.097		172.838	305.357	1.76673	0.821079	1.114e-05	0.000115649
B0228.1		321.911		239.63	404.191	1.68673	0.754229	1.11452e-05	0.000115649
K10G4.13		10.2541		0	20.5082	Inf	Inf	1.11746e-05	0.000115844
C04G2.3		129.225		65.4767	192.974	2.94722	1.55935	1.11874e-05	0.000115923
B0524.4		45.7965		21.3736	70.2194	3.28533	1.71604	1.1198e-05	0.000115977
F33D11.7		92.6616		56.4665	128.857	2.282	1.1903	1.12207e-05	0.000116158
F07A11.5		558.416		428.106	688.725	1.60877	0.68596	1.12338e-05	0.000116184
R03G5.5		275.356		199.506	351.206	1.76038	0.815887	1.1278e-05	0.000116585
K08E7.9		792.397		481.158	1103.64	2.29371	1.19768	1.13539e-05	0.000117259
F19C7.5		21.2663		4.88678	37.6459	7.70362	2.94554	1.13722e-05	0.000117393
D2013.10		342.562		426.658	258.466	0.605792	-0.723106	1.13907e-05	0.000117529
C28G1.5		280.471		209.165	351.778	1.68182	0.750026	1.14222e-05	0.000117686
Y49E10.9		37.0784		15.3976	58.7592	3.81613	1.93211	1.14464e-05	0.000117825
Y22D7AL.15		428.075		320.29	535.859	1.67304	0.742476	1.15222e-05	0.000118551
F35F10.5		55.6225		99.1544	12.0906	0.121937	-3.0358	1.1578e-05	0.000119013
K01G5.5		11188.4		13527.3	8849.41	0.654188	-0.612222	1.1613e-05	0.000119316
Y54G2A.49		51.0481		24.9637	77.1325	3.08978	1.62751	1.16606e-05	0.00011975
Y69A2AR.14		79.8308		36.949	122.713	3.32114	1.73168	1.17202e-05	0.000120306
C14A4.8		50.9546		25.26	76.6492	3.03441	1.60141	1.17523e-05	0.000120465
C32B5.10		611.954		736.7	487.207	0.661337	-0.596542	1.17579e-05	0.000120467
Y32F6A.6		291.18		217.256	365.104	1.68052	0.74891	1.1801e-05	0.000120852
F12F3.1		140.284		93.5565	187.011	1.99891	0.999212	1.18342e-05	0.000121134
T05F1.5		364.793		208.116	521.47	2.50568	1.3252	1.18542e-05	0.000121283
C45G9.15		36.63		14.1898	59.0702	4.16286	2.05758	1.19135e-05	0.000121776
C30G7.4		248.77		180.903	316.637	1.75031	0.807608	1.20788e-05	0.000123292
C49A9.9		573.417		453.952	692.881	1.52633	0.610069	1.21447e-05	0.000123849
F16G10.5		10.767		0.559438	20.9746	37.4923	5.22852	1.25878e-05	0.000128011
C10G11.9		128.9		78.5773	179.224	2.28086	1.18958	1.27726e-05	0.00012983
Y71G12A.4		115.742		72.4827	159.001	2.19364	1.13333	1.31064e-05	0.000132976
Y38E10A.17		1599.12		1074.87	2123.38	1.97548	0.982201	1.31481e-05	0.000133276
T03G11.1		339.92		256.506	423.334	1.65039	0.722804	1.31845e-05	0.00013346
Y76B12C.4		174.762		121.851	227.674	1.86847	0.901855	1.3206e-05	0.000133615
C36B7.5		62.5935		33.2071	91.9799	2.76988	1.46983	1.32896e-05	0.000134399
Y39E4B.11		63.9767		33.3553	94.5981	2.83607	1.5039	1.33426e-05	0.000134811
ZK6.11		7976.41		5893.92	10058.9	1.70666	0.771173	1.34752e-05	0.000135965
Y6E2A.8		26.4938		8.77322	44.2144	5.0397	2.33334	1.36151e-05	0.000137247
D1086.17		620.895		411.782	830.009	2.01565	1.01125	1.36617e-05	0.00013759
F10F2.8		168.619		101.57	235.667	2.32025	1.21428	1.36688e-05	0.000137598
F42A9.7		299.554		187.301	411.806	2.19863	1.1366	1.36805e-05	0.000137653
T06E4.5		31.0544		10.9813	51.1275	4.65585	2.21905	1.38944e-05	0.000139678
W03D8.8		378.964		252.204	505.723	2.00521	1.00375	1.39145e-05	0.000139815
ZC513.10		26.7555		6.06492	47.4461	7.82304	2.96773	1.39342e-05	0.00013994
C43F9.5		47.5322		22.374	72.6905	3.24889	1.69995	1.39525e-05	0.00013994
ZC204.2		400.268		492.628	307.908	0.625032	-0.677998	1.40429e-05	0.000140719
C30G7.3		403.456		242.475	564.436	2.32782	1.21898	1.44527e-05	0.000144692
R10E8.6		275.856		204.896	346.815	1.69263	0.75927	1.44651e-05	0.00014475
C16C10.12		80.2302		44.8961	115.564	2.57404	1.36403	1.45435e-05	0.000145348
F40B5.1		187.076		131.647	242.505	1.84208	0.88134	1.45448e-05	0.000145348
ZC204.12		204.298		121.343	287.253	2.36727	1.24322	1.45726e-05	0.00014556
B0310.1		277.027		205.104	348.95	1.70133	0.766664	1.45949e-05	0.000145716
F46F5.1		17.1177		2.7083	31.5271	11.6409	3.54113	1.47222e-05	0.00014692
ZK512.8		399.32		258.191	540.449	2.09321	1.06572	1.47861e-05	0.00014749
C03B8.4		8573.63		10279.1	6868.17	0.668169	-0.581715	1.48535e-05	0.000148028
C50F2.6		192.096		283.493	100.7	0.355212	-1.49325	1.49229e-05	0.000148584
F58A3.2		495.245		386.438	604.053	1.56313	0.644441	1.50569e-05	0.000149715
W03D8.1		43.6254		19.7546	67.4962	3.41674	1.77262	1.51808e-05	0.000150741
F57F5.1		19074.2		24539.7	13608.8	0.554564	-0.850573	1.51977e-05	0.000150841
K05F1.9		360.363		185.149	535.578	2.89269	1.53241	1.56522e-05	0.000155001
Y57G7A.5		148.752		92.2669	205.237	2.22438	1.15341	1.59096e-05	0.000157407
W01G7.5		2114.28		2660.48	1568.08	0.589397	-0.762688	1.60516e-05	0.000158625
Y38H6C.1		14275.3		17327.3	11223.4	0.64773	-0.626534	1.60544e-05	0.000158625
C01B7.4		269.242		199.032	339.452	1.70552	0.770208	1.6121e-05	0.000159211
ZK856.18		147.237		63.4132	231.061	3.64374	1.86542	1.61588e-05	0.000159513
C11G10.1		86.9157		52.1652	121.666	2.33233	1.22177	1.62264e-05	0.000159891
VC5.2		620.897		493.654	748.14	1.51551	0.599808	1.62705e-05	0.000160254
K12D12.4		45.122		21.3736	68.8704	3.22222	1.68805	1.62819e-05	0.000160294
K09B11.5		95.6721		54.8474	136.497	2.48867	1.31537	1.63843e-05	0.000161158
F18A1.1		60.2523		24.671	95.8336	3.88447	1.95772	1.64189e-05	0.000161425
C28C12.5		1113.48		809.754	1417.2	1.75016	0.807489	1.67055e-05	0.000163949
F49C12.14		208.908		149.697	268.119	1.79108	0.840827	1.68182e-05	0.000164686
C14A6.6		67.5021		36.7415	98.2626	2.67443	1.41923	1.68842e-05	0.000165091
C10G11.8		2288.04		1524.3	3051.78	2.00208	1.0015	1.68787e-05	0.000165091
T28H10.3		1579.68		1249.59	1909.78	1.52833	0.611951	1.70204e-05	0.000166147
K07F5.4		106.27		45.6926	166.847	3.65152	1.8685	1.70423e-05	0.000166212
T13H2.5		2969.47		3626.2	2312.74	0.637787	-0.648854	1.70634e-05	0.000166343
F59A6.8		36.3845		14.7789	57.9902	3.92385	1.97227	1.70812e-05	0.000166369
T27A3.4		558.794		333.942	783.647	2.34666	1.23061	1.71049e-05	0.000166526
C37E2.5		204.222		145.192	263.252	1.81313	0.858486	1.72529e-05	0.000167817
Y51A2B.4		36.4813		14.8085	58.1541	3.92707	1.97345	1.72638e-05	0.000167848
Y53C12A.2		171.751		99.7364	243.765	2.4441	1.2893	1.73725e-05	0.000168756
C46H11.10		60.9393		26.1122	95.7663	3.66749	1.87479	1.73897e-05	0.000168848
C43E11.5		78.7157		39.5684	117.863	2.97872	1.57469	1.74463e-05	0.000169276
Y6D11A.1		1501.52		1805.12	1197.92	0.663625	-0.59156	1.74492e-05	0.000169276
C35A11.2		28.0167		7.65434	48.3791	6.32048	2.66003	1.75276e-05	0.000169811
ZC455.5		366.409		191.967	540.852	2.81743	1.49438	1.75252e-05	0.000169811
F38H4.3		139.474		89.2848	189.663	2.12424	1.08695	1.76335e-05	0.000170761
F14H3.12		73.5742		43.0696	104.079	2.41653	1.27294	1.76546e-05	0.00017089
T20H9.6		37.9865		15.9866	59.9863	3.75228	1.90777	1.77955e-05	0.000172026
F08F1.5		108.683		147.604	69.7613	0.472625	-1.08123	1.78109e-05	0.000172099
C42C1.9		228.459		161.567	295.351	1.82804	0.870295	1.78223e-05	0.000172133
F32B5.4		474.082		269.202	678.963	2.52213	1.33464	1.80877e-05	0.000174318
C34D10.2		1494.52		973.226	2015.82	2.07127	1.05052	1.81231e-05	0.0001745
Y34F4.1		130.32		84.1646	176.475	2.09679	1.06818	1.82636e-05	0.000175544
Y48G9A.3		8829.97		11150.6	6509.33	0.583764	-0.776543	1.84083e-05	0.000176857
B0432.12		71.8791		40.7761	102.982	2.52555	1.3366	1.84906e-05	0.000177492
Y57A10A.19		1858.19		2310.13	1406.26	0.608736	-0.71611	1.85072e-05	0.000177573
B0391.5		99.6947		136.508	62.8819	0.460647	-1.11827	1.87216e-05	0.000179395
Y38E10A.26		44.8839		21.6664	68.1014	3.14318	1.65223	1.87571e-05	0.000179499
F46A8.1		24.7177		8.12489	41.3105	5.08444	2.34609	1.88248e-05	0.000180068
F14E5.8		65.4499		35.3856	95.5142	2.69924	1.43255	1.89338e-05	0.000181032
Y51H4A.17		211.886		152.698	271.073	1.77522	0.828001	1.89728e-05	0.000181247
T22B11.3		75.4693		43.4809	107.458	2.47138	1.30532	1.915e-05	0.00018274
C24D10.2		345.404		225.955	464.854	2.05729	1.04074	1.92342e-05	0.000183424
C07B5.4		195.354		139.923	250.784	1.79229	0.841805	1.94625e-05	0.00018552
Y95B8A.1		36.0912		12.4819	59.7006	4.78299	2.25791	1.95448e-05	0.000186224
C32C4.1		60.1765		31.5881	88.765	2.81008	1.49061	1.99606e-05	0.000189789
F22B3.8		69.5051		37.8604	101.15	2.67165	1.41773	2.00942e-05	0.000190712
C04G2.2		232.553		126.949	338.158	2.66374	1.41345	2.02185e-05	0.000191808
Y53H1C.3		82.0022		47.5155	116.489	2.4516	1.29372	2.03605e-05	0.000193072
F38A5.7		620.976		748.122	493.83	0.660093	-0.599259	2.04721e-05	0.000193795
F16B4.8		1030.84		1239.48	822.209	0.663352	-0.592153	2.06386e-05	0.000195033
F53G2.6		1157.14		1388.91	925.376	0.666261	-0.58584	2.06211e-05	0.000195033
Y71G12B.13		1226.81		1516.55	937.076	0.617899	-0.694556	2.06308e-05	0.000195033
C17C3.15		223.516		158.767	288.266	1.81566	0.860492	2.07822e-05	0.000196221
T04A8.3		36.6788		13.8378	59.5199	4.30126	2.10476	2.12589e-05	0.000200464
T23G11.1		736.759		496.305	977.213	1.96898	0.977445	2.1273e-05	0.00020051
C50E3.12		354.392		478.546	230.238	0.48112	-1.05553	2.13048e-05	0.000200723
Y50E8A.10		52.0245		26.3197	77.7293	2.95328	1.56232	2.1329e-05	0.000200779
C03E10.5		1147.66		1622.75	672.567	0.414462	-1.27069	2.13288e-05	0.000200779
T23G4.1		435.608		300.413	570.803	1.90006	0.926045	2.16933e-05	0.000203683
C14A6.13		69.8084		39.5387	100.078	2.53114	1.33979	2.17443e-05	0.000203986
C32E8.9		567.042		685.246	448.839	0.655003	-0.610426	2.18394e-05	0.000204791
T20H4.2		68.1937		38.7719	97.6154	2.51769	1.3321	2.20046e-05	0.000205988
M04D5.3		281.572		210.547	352.597	1.67468	0.743882	2.20684e-05	0.000206496
Y69E1A.1		1133.26		710.137	1556.38	2.19166	1.13202	2.22429e-05	0.000207952
Y32B12B.4		2614.23		3143.81	2084.65	0.663099	-0.592705	2.22729e-05	0.000208143
C32E8.4		192.116		133.243	250.99	1.88369	0.913563	2.23441e-05	0.000208542
C15A11.5		23.6077		6.03529	41.1802	6.82324	2.77046	2.28186e-05	0.000212518
Y53C12A.7		45.1657		21.7553	68.5762	3.15217	1.65634	2.29765e-05	0.000213716
C18E3.1		70.5104		35.0929	105.928	3.0185	1.59383	2.30007e-05	0.000213759
T26A5.1		321.003		189.595	452.411	2.3862	1.25471	2.31588e-05	0.000215137
ZC412.5		60.7471		32.8847	88.6095	2.69455	1.43004	2.33776e-05	0.000216894
Y82E9BR.19		1255		1519.12	990.876	0.652269	-0.616461	2.33697e-05	0.000216894
Y39G10AR.25		88.006		41.2171	134.795	3.27037	1.70945	2.35371e-05	0.000217837
PDB1.1		536.832		424.594	649.07	1.52868	0.61229	2.35389e-05	0.000217837
F11E6.3		29002.3		22786.7	35217.8	1.54554	0.628108	2.37049e-05	0.000219095
Y43C5A.4		103.113		57.3779	148.848	2.59417	1.37527	2.37478e-05	0.000219349
K03H1.9		49.4599		24.5524	74.3673	3.02892	1.5988	2.38333e-05	0.000219911
F02E11.1		146.326		84.9942	207.658	2.4432	1.28877	2.38828e-05	0.00022009
F19H8.4		178.858		258.407	99.309	0.384313	-1.37965	2.38714e-05	0.00022009
F37C4.2		16.1348		3.327	28.9426	8.69931	3.1209	2.43014e-05	0.000223088
C34G6.3		177.351		100.892	253.809	2.51565	1.33093	2.43103e-05	0.000223088
C34D4.3		326.661		225.218	428.103	1.90084	0.92664	2.43139e-05	0.000223088
Y102A5C.6		460.351		563.524	357.178	0.633829	-0.657835	2.43194e-05	0.000223088
Y59A8B.1		1884.47		2276.33	1492.62	0.655714	-0.608862	2.42767e-05	0.000223088
R10E8.8		110.804		72.7423	148.865	2.04647	1.03314	2.43514e-05	0.000223187
T10E9.6		40.3806		18.1651	62.5961	3.44595	1.7849	2.45588e-05	0.000224806
R12E2.7		74.3577		6.71325	142.002	21.1525	4.40276	2.466e-05	0.000225638
C08G9.2		45.703		68.2964	23.1095	0.33837	-1.56332	2.47513e-05	0.000225907
M110.7		148.831		79.1071	218.555	2.76277	1.46612	2.47339e-05	0.000225907
W02F12.2		206.507		149.993	263.021	1.75355	0.810281	2.47217e-05	0.000225907
F43G6.6		124.071		72.4531	175.689	2.42487	1.27791	2.47691e-05	0.000225976
Y59H11AR.6		257.556		162.179	352.934	2.1762	1.12181	2.50437e-05	0.000228195
F10F2.5		36.7906		15.4272	58.1541	3.76958	1.9144	2.50912e-05	0.000228534
C25H3.1		35.6259		15.2494	56.0024	3.67243	1.87673	2.51296e-05	0.000228788
C38C3.3		251.155		141.286	361.023	2.55526	1.35347	2.52674e-05	0.000229947
ZC581.3		879.555		694.397	1064.71	1.53329	0.616632	2.54012e-05	0.000230977
Y37E11AL.2		169.066		118.85	219.282	1.84503	0.883647	2.58346e-05	0.00023433
Y94H6A.2		46.6031		23.2558	69.9505	3.00787	1.58874	2.60114e-05	0.000235641
F52B11.6		71.8344		102.211	41.4576	0.405607	-1.30185	2.6257e-05	0.000237277
Y41E3.3		127.594		85.1685	170.02	1.99628	0.997314	2.63174e-05	0.000237725
F49A5.2		46.9264		23.1669	70.6859	3.05116	1.60936	2.63808e-05	0.000238101
C37A2.3		217.215		127.152	307.278	2.41661	1.27298	2.63703e-05	0.000238101
R01H2.4		35.4203		14.8381	56.0024	3.77422	1.91618	2.6471e-05	0.000238817
F26G1.11		21.0313		5.9464	36.1162	6.07363	2.60256	2.65027e-05	0.000239005
R01H2.2		94.1019		50.7571	137.447	2.70793	1.43719	2.65281e-05	0.000239135
Y45F10D.13		324.411		244.728	404.095	1.6512	0.723515	2.67274e-05	0.000240536
F36H5.1		332.635		253.438	411.831	1.62498	0.700419	2.67749e-05	0.000240864
F18A12.5		75.8208		42.1878	109.454	2.59445	1.37543	2.70027e-05	0.000242615
C50E10.1		384.28		174.408	594.152	3.40667	1.76836	2.71509e-05	0.000243748
C50F7.10		564.175		448.884	679.467	1.51368	0.598062	2.71834e-05	0.000243938
C38C3.7		49.2374		23.641	74.8337	3.16542	1.6624	2.72391e-05	0.000244337
R06F6.11		267.482		200.299	334.665	1.67083	0.740565	2.78562e-05	0.000249457
Y97E10B.7		37.492		15.3087	59.6754	3.89814	1.96279	2.79694e-05	0.000250274
C38C10.3		70.6295		32.944	108.315	3.28785	1.71714	2.80647e-05	0.000251023
C02F5.8		75.8379		23.7856	127.89	5.37679	2.42675	2.80978e-05	0.000251218
C12D8.17		12.8494		1.05961	24.6392	23.253	4.53935	2.82538e-05	0.000252509
F49C12.6		127.745		85.9021	169.587	1.97419	0.981262	2.85818e-05	0.000255134
T26H5.9		130.777		19.3101	242.244	12.545	3.64904	2.86263e-05	0.000255421
C41G7.4		438.547		530.221	346.874	0.654205	-0.612185	2.87079e-05	0.000256045
Y39G8C.2		82.711		36.7712	128.651	3.49869	1.80681	2.87426e-05	0.000256146
B0047.3		173.828		123.966	223.69	1.80444	0.851552	2.874e-05	0.000256146
F38H4.6		62.5004		34.0925	90.9083	2.66652	1.41496	2.87888e-05	0.000256349
C06E1.3		264.392		197.153	331.631	1.6821	0.750262	2.88514e-05	0.000256802
C26F1.2		319.469		230.561	408.377	1.77123	0.824755	2.91519e-05	0.000259371
W03D8.5		138.404		83.3752	193.432	2.32002	1.21414	2.92641e-05	0.00026012
Y40B10A.2		281.587		351.533	211.642	0.602053	-0.732037	2.93283e-05	0.000260517
Y53C10A.15		29.3308		9.83283	48.8287	4.96589	2.31205	2.96144e-05	0.000262846
T03D8.7		52.7833		27.3793	78.1873	2.85571	1.51385	2.97817e-05	0.000264101
C49F8.3		102.681		66.4439	138.918	2.09075	1.06402	3.0472e-05	0.000269693
F01E11.4		80.7383		48.2195	113.257	2.34878	1.23191	3.05676e-05	0.00027043
F35E12.4		26.0517		8.03599	44.0673	5.48374	2.45516	3.09015e-05	0.000273011
F54D11.3		407.052		497.459	316.645	0.636525	-0.65171	3.09218e-05	0.000273011
Y71F9AL.2		162.479		90.796	234.163	2.579	1.36681	3.09595e-05	0.000273234
W03B1.8		34.1		14.1602	54.0398	3.81632	1.93218	3.12108e-05	0.000275208
Y41D4B.16		382.375		294.092	470.658	1.60037	0.678409	3.12715e-05	0.000275544
Y39B6A.31		83.59		38.92	128.26	3.29547	1.72049	3.14439e-05	0.000276894
ZK1240.2		279.369		210.435	348.302	1.65515	0.726965	3.14627e-05	0.000276894
W01B11.3		12904		16205.9	9602.01	0.592501	-0.75511	3.16046e-05	0.000278032
F36H5.14		144.372		99.9177	188.826	1.88982	0.918247	3.19581e-05	0.000280915
T21D12.14		23.5805		7.53582	39.6253	5.25826	2.39459	3.2062e-05	0.000281716
C38C6.5		37.9086		16.4276	59.3896	3.61524	1.85409	3.21557e-05	0.000282426
T23C6.4		134.844		177.102	92.5851	0.522777	-0.935732	3.22613e-05	0.000283127
T12A7.6		104.448		68.9151	139.981	2.0312	1.02234	3.23926e-05	0.000284076
W06A7.4		320.336		245.113	395.559	1.61378	0.690446	3.24078e-05	0.000284076
C15H9.7		1883.22		2305.44	1461.01	0.633725	-0.658071	3.26433e-05	0.00028602
R04B5.4		543.169		427.418	658.921	1.54163	0.62446	3.33591e-05	0.000291825
K07C5.7		243.722		179.666	307.778	1.71305	0.776571	3.34299e-05	0.000292095
C04E6.5		93.2146		46.1038	140.325	3.04368	1.60582	3.35123e-05	0.000292698
Y40B1B.5		2375.85		2910.54	1841.16	0.632584	-0.660671	3.39892e-05	0.000296627
F10C1.8		58.9028		31.4696	86.336	2.74348	1.456	3.42381e-05	0.000298561
F26F12.5		69.5983		40.5095	98.6871	2.43615	1.2846	3.42846e-05	0.000298848
T07D10.6		117.164		77.8069	156.522	2.01167	1.00839	3.43377e-05	0.000299092
Y41D4B.11		2057.65		2468.23	1647.08	0.667314	-0.583563	3.44682e-05	0.000299852
T07H3.1		79.1971		16.6611	141.733	8.50686	3.08863	3.45008e-05	0.000300016
F09F7.1		32.2886		13.6304	50.9468	3.73774	1.90217	3.45797e-05	0.000300463
R13A5.3		396.773		245.84	547.706	2.2279	1.15568	3.52764e-05	0.000306274
ZK1053.6		74.4389		32.9144	115.963	3.52319	1.81688	3.54076e-05	0.00030717
K02A11.3		540.993		431.478	650.508	1.50763	0.592278	3.53987e-05	0.00030717
T06A1.5		354.362		273.367	435.357	1.59257	0.671359	3.55182e-05	0.000307885
F56F11.3		482.408		380.347	584.47	1.53668	0.619814	3.55584e-05	0.000308112
C34B4.3		58.9959		32.1475	85.8443	2.67032	1.41701	3.56856e-05	0.000309092
M70.3		520.576		326.469	714.684	2.18913	1.13036	3.57109e-05	0.000309188
C06E7.2		325.302		246.992	403.611	1.63411	0.708504	3.61914e-05	0.000313101
B0496.6		39.3569		16.5757	62.138	3.74874	1.90641	3.66802e-05	0.000316081
W07E6.1		4528.33		5621.78	3434.89	0.610998	-0.710761	3.66527e-05	0.000316081
T08B6.5		20.8924		35.2078	6.5769	0.186802	-2.42042	3.67091e-05	0.000316206
C37C3.13		434.691		216.575	652.806	3.01423	1.59179	3.67613e-05	0.000316532
F54H5.2		44.3048		21.4329	67.1768	3.13429	1.64814	3.78534e-05	0.000325168
W06H3.3		5530.19		6776.4	4283.99	0.632193	-0.661564	3.78436e-05	0.000325168
Y17D7B.4		396.832		266.713	526.95	1.97572	0.982378	3.82203e-05	0.000328063
D2092.7		48.5481		24.1115	72.9846	3.02696	1.59787	3.84119e-05	0.000329578
Y69H2.9		68.8155		97.3837	40.2472	0.413285	-1.27479	3.88195e-05	0.000332554
F07C3.2		123.829		82.6937	164.965	1.99489	0.996307	3.90516e-05	0.000334281
C33H5.16		79.0139		40.5095	117.518	2.90101	1.53656	3.95302e-05	0.000337587
C55F2.1		1200.73		1512.22	889.251	0.588045	-0.766001	3.98609e-05	0.000340013
T20B12.9		150.6		103.449	197.752	1.9116	0.934781	3.98923e-05	0.000340148
F29B9.7		65.2143		37.8604	92.5682	2.44499	1.28983	4.02382e-05	0.000342964
Y82E9BL.10		88.0439		50.1349	125.953	2.51228	1.329	4.09767e-05	0.000348716
Y97E10AR.1		102.35		66.355	138.346	2.08494	1.06	4.11332e-05	0.00034969
M05B5.1		262.148		170.048	354.249	2.08323	1.05882	4.16728e-05	0.000353678
B0547.3		153.809		89.433	218.185	2.43965	1.28667	4.24232e-05	0.000359438
F57C12.4		452.751		547.064	358.439	0.655205	-0.609982	4.24047e-05	0.000359438
C02G6.2		32.1233		9.33265	54.9139	5.88406	2.55681	4.32925e-05	0.000365865
F45H7.6		140.738		82.8158	198.66	2.39882	1.26233	4.32912e-05	0.000365865
F48C1.4		452.911		544.24	361.582	0.66438	-0.58992	4.34791e-05	0.000367017
C27H5.2		334.173		257.914	410.432	1.59135	0.670254	4.35325e-05	0.000367326
C04F12.12		59.8436		33.3849	86.3023	2.58507	1.3702	4.36145e-05	0.000367826
ZC8.3		331.99		249.203	414.777	1.66441	0.735013	4.36253e-05	0.000367826
[truncated: 957 more rows]
