# Supplementary material for: Dietary Restriction Induced Longevity Is Mediated by Nuclear Receptor NHR-62 in Caenorhabditis elegans
Source: PLoS Genet. 2013 Jul 25;9(7):e1003651. doi: 10.1371/journal.pgen.1003651 (PMC3723528; doi:10.1371/journal.pgen.1003651)
Supplement: Table S7 — Gene enrichment DAVID analysis of rescued genes. (XLSX) [file pgen.1003651.s015.xlsx]

## Sheet: Sheet1
Gene Name	Common Name	KOGs (euKaryotic Orthologous Groups) and LSEs (Lineage-Specific Expansions peculiar to a single lineage)	GO:0006793: phosphorus metabolic process	GO:0006470: protein amino acid dephosphorylation	GO:0016311: dephosphorylation	GO:0006869: lipid transport	GO:0010876: lipid localization	GO:0006334: nucleosome assembly	GO:0006518: peptide metabolic process	GO:0019290: siderophore biosynthetic process	GO:0019540: siderophore biosynthetic process from catechol	GO:0034311: diol metabolic process	GO:0034728: nucleosome organization	GO:0009075: histidine family amino acid metabolic process	GO:0009077: histidine family amino acid catabolic process	GO:0009238: enterobactin metabolic process	GO:0046700: heterocycle catabolic process	Total Gene Ontology (GO) Categories	eat-2 vs. N2 (relative expression)	nhr-62;eat-2 vs. eat-2 (relative expression)	nhr-62;eat-2 vs. N2 (relative expression)	nhr-62;eat-2 vs. nhr-62 (relative expression)	nhr-62 vs N2 (relative expression)
F59D8.1	vit-3	KOG: Predicted lipoprotein				x	x											2	-14.6907	2.50861	-5.85612	-5.86433	1.0014
K09F5.2	vit-1	KOG: Predicted lipoprotein				x	x											2	-7.92708	1.56031	-5.08046	-4.98942	-1.01825
F59D8.2	vit-4	KOG: Predicted lipoprotein				x	x											2	-7.42354	2.30875	-3.21539	-3.08447	-1.04244
C04F6.1	vit-5	KOG: Predicted lipoprotein				x	x											2	-7.2622	2.20386	-3.29521	-3.27516	-1.00612
F09E10.3	dhs-25	KOG: Mitochondrial/plastidial beta-ketoacyl-ACP reductase							x	x	x	x						4	-5.19463	1.85518	-2.80007	-2.6876	-1.04185
T22G5.6	lbp-8					x	x											2	-4.2993	4.39605	1.0225	-1.20626	1.23341
K07H8.6	vit-6	KOG: Predicted lipoprotein				x	x											2	-2.71662	1.96075	-1.3855	-1.3845	-1.00072
R05D8.8	dhs-14	KOG: Reductases with broad range of substrate specificities							x	x	x	x				x		5	-2.16137	1.60267	-1.3486	-1.31581	-1.02493
C42D8.2	vit-2	KOG: Predicted lipoprotein				x	x											2	-1.99229	1.66558	-1.19616	-1.14477	-1.04489
C50F4.6								x					x					2	-1.8276	1.57501	-1.16037	-1.27811	1.10146
F18H3.5	cdk-4	KOG: Protein kinase PCTAIRE and related kinases	x															1	-1.61347	1.54063	-1.04727	-1.0894	1.04023
Y38H8A.3		KOG: Casein kinase (serine/threonine/tyrosine protein kinase)	x															1	4.08856	-1.84396	2.21728	2.66199	-1.20057
K09C6.1		KOG: Casein kinase (serine/threonine/tyrosine protein kinase)	x															1	3.99227	-1.79666	2.22205	2.83639	-1.27648
F01D4.3			x															1	3.76898	-2.11093	1.78547	3.36317	-1.88364
D2024.1		KOG: Casein kinase (serine/threonine/tyrosine protein kinase)	x															1	3.21235	-2.82594	1.13674	3.27935	-2.88488
B0207.1			x	x	x													3	3.14404	-1.85077	1.69878	2.01678	-1.1872
C25A8.5		KOG: Protein tyrosine kinase	x															1	3.11888	-1.75842	1.77369	2.1211	-1.19587
Y73F4A.3		LSE: Unnamed protein												x	x		x	3	3.10901	-1.60385	1.93846	1.88425	1.02877
Y73F4A.2		LSE: Unnamed protein												x	x		x	3	3.06269	-1.67486	1.82862	1.87596	-1.02589
T06C10.6	kin-26	KOG: Protein tyrosine kinase	x															1	3.05232	-1.80782	1.6884	2.12807	-1.26041
ZC155.2								x					x					2	3.04662	-2.42255	1.25761	1.66658	-1.3252
Y39G8C.2		KOG: Casein kinase (serine/threonine/tyrosine protein kinase)	x															1	3.03375	-2.00564	1.51261	1.91976	-1.26917
C36B1.10	gska-3	KOG: Glycogen synthase kinase-3	x															1	3.00151	-1.79771	1.66963	2.32447	-1.39221
R05H5.2	cdc-25.4	KOG: M-phase inducer phosphatase	x	x	x													3	2.99105	-2.10438	1.42135	1.70377	-1.1987
K07F5.4	kin-24	0	x															1	2.98142	-2.20611	1.35143	1.96501	-1.45402
K11C4.1		KOG: Casein kinase (serine/threonine/tyrosine protein kinase)	x															1	2.94749	-1.87584	1.57129	1.83195	-1.16589
K08H2.5		KOG: Casein kinase (serine/threonine/tyrosine protein kinase)	x															1	2.91361	-2.46192	1.18347	1.4845	-1.25436
F59A3.8		KOG: Protein tyrosine kinase	x															1	2.90891	-1.72926	1.68217	2.08253	-1.238
W03G9.5		KOG: Casein kinase (serine/threonine/tyrosine protein kinase)	x															1	2.88347	-1.79963	1.60226	1.88574	-1.17693
C49C8.1			x															1	2.83208	-1.88013	1.50632	1.61179	-1.07002
F40G12.10		KOG: Protein tyrosine phosphatase	x	x	x													3	2.81249	-1.70923	1.64547	1.98078	-1.20378
K07F5.6		KOG: Protein tyrosine phosphatase	x	x	x													3	2.80381	-1.79041	1.56601	1.88037	-1.20073
E03A3.4	his-70							x					x					2	2.79427	-2.11409	1.32174	1.6764	-1.26833
C03C10.2			x															1	2.79326	-1.94223	1.43817	1.56192	-1.08605
T05C12.3		KOG: Reductases with broad range of substrate specificities							x	x	x	x				x		5	2.78702	-1.90493	1.46306	2.12973	-1.45566
T11F8.4		KOG: Casein kinase (serine/threonine/tyrosine protein kinase)	x															1	2.77205	-1.84231	1.50466	2.17413	-1.44493
ZK945.6			x															1	2.75165	-1.97849	1.39078	1.66695	-1.19857
F21F3.2		KOG: Glycogen synthase kinase-3	x															1	2.71277	-1.74423	1.55528	2.08088	-1.33795
ZC581.2			x															1	2.7058	-1.70001	1.59164	1.97283	-1.23949
B0218.5			x															1	2.69574	-1.8665	1.44428	1.87672	-1.29942
C33H5.16			x	x	x													3	2.67855	-1.88521	1.42082	2.00189	-1.40896
T05C12.1		KOG: Casein kinase (serine/threonine/tyrosine protein kinase)	x															1	2.63377	-1.76694	1.49058	1.66927	-1.11988
F26A1.3		KOG: Casein kinase (serine/threonine/tyrosine protein kinase)	x															1	2.63125	-1.7145	1.5347	2.02617	-1.32023
F55F8.7			x	x	x													3	2.61822	-1.80471	1.45077	1.93779	-1.3357
T25B9.4		KOG: Protein tyrosine kinase	x															1	2.61232	-1.80325	1.44867	1.53841	-1.06195
W01B6.2		KOG: Casein kinase (serine/threonine/tyrosine protein kinase)	x															1	2.58908	-1.74045	1.48759	1.83814	-1.23565
T27A3.5			x	x	x													3	2.57298	-1.75313	1.46765	2.26341	-1.5422
ZK354.6		KOG: Casein kinase (serine/threonine/tyrosine protein kinase)	x															1	2.55617	-1.7005	1.50319	1.8579	-1.23597
F53C3.1		KOG: Casein kinase (serine/threonine/tyrosine protein kinase)	x															1	2.54423	-2.14244	1.18754	1.54465	-1.30072
F38E1.3			x															1	2.5259	-1.83344	1.37768	1.91314	-1.38866
ZC581.7		KOG: Protein tyrosine kinase	x															1	2.48129	-1.76488	1.40593	1.63236	-1.16106
F47B3.7			x	x	x													3	2.46372	-1.83437	1.34309	1.7573	-1.30841
K09B11.5		KOG: Protein tyrosine kinase	x															1	2.44815	-1.81273	1.35053	2.10918	-1.56174
Y57G11C.6		KOG: Protein tyrosine phosphatase	x	x	x													3	2.41843	-1.93058	1.25269	1.74713	-1.3947
B0280.11			x	x	x													3	2.38787	-1.53423	1.5564	1.88757	-1.21278
B0496.3	unc-82		x															1	2.35817	-2.22201	1.06128	1.00173	1.05945
C18H7.4			x															1	2.3355	-1.70291	1.37148	1.78112	-1.29869
W01B6.6			x	x	x													3	2.32088	-1.99067	1.16588	1.72642	-1.48079
C09D4.3			x															1	2.3184	-1.73112	1.33925	1.82875	-1.36551
C50F4.10			x															1	2.29665	-1.71173	1.34172	1.67362	-1.24737
Y71F9AL.2		KOG: Casein kinase (serine/threonine/tyrosine protein kinase)	x															1	2.29455	-1.7122	1.34012	1.70564	-1.27276
F25F2.1			x															1	2.28971	-1.68754	1.35684	1.65371	-1.2188
T06C10.3		KOG: Protein tyrosine kinase	x															1	2.27183	-1.80843	1.25624	1.70531	-1.35747
T21G5.1		KOG: Protein tyrosine kinase	x															1	2.2496	-1.9205	1.17136	1.5974	-1.36371
B0523.1	kin-31		x															1	2.2372	-2.0312	1.10142	1.36664	-1.2408
W01C9.4		KOG: Reductases with broad range of substrate specificities							x	x	x	x				x		5	2.23643	-1.56794	1.42634	1.64179	-1.15105
T04B2.2	frk-1	KOG: Protein tyrosine kinase	x															1	2.22986	-1.7108	1.30341	1.60594	-1.23211
T04F3.3			x	x	x													3	2.18791	-1.71091	1.2788	1.75087	-1.36916
W08D2.8	kin-21	KOG: Protein tyrosine kinase	x															1	2.18107	-1.8977	1.14932	1.93057	-1.67974
R155.2			x	x	x													3	2.17125	-1.82905	1.1871	1.57851	-1.32972
C24D10.1			x	x	x													3	2.15762	-1.77782	1.21363	1.58102	-1.30272
ZK484.7		KOG: Protein tyrosine phosphatase	x	x	x													3	2.15645	-1.60084	1.34707	1.79438	-1.33205
T10E9.3														x	x		x	3	2.15605	-2.4033	-1.11468	-1.0905	-1.02217
F20H11.4			x	x	x													3	2.13839	-1.73483	1.23262	1.37795	-1.1179
M7.7			x															1	2.10336	-1.72307	1.2207	1.52268	-1.24738
T28F4.3		KOG: Protein tyrosine phosphatase	x	x	x													3	2.06197	-1.9597	1.05219	1.09231	-1.03813
C48B6.4			x	x	x													3	2.04983	-1.78414	1.14892	1.38215	-1.203
F11E6.8			x															1	2.00533	-1.75661	1.14159	-1.034	1.18041
ZK1251.1	htas-1	KOG: Histone 2A						x					x					2	1.98467	-1.6542	1.19978	1.24069	-1.0341
F57B9.8			x															1	1.98328	-1.6963	1.16918	1.64144	-1.40393
F13D11.3			x	x	x													3	1.95105	-1.50636	1.2952	1.16294	1.11373
F23C8.7			x															1	1.94667	-1.60343	1.21406	1.50568	-1.2402
C04G6.1	mpk-2		x															1	1.81176	-1.66277	1.08961	1.02914	1.05876
F22D6.1	kin-14		x															1	1.7608	-1.50524	1.16978	1.31995	-1.12838
F23C8.8			x															1	1.69673	-1.59607	1.06307	1.39841	-1.31545
Grand Total			67	19	19	7	7	4	4	4	4	4	4	3	3	3	3	155
