# Supplementary material for: Dietary Restriction Induced Longevity Is Mediated by Nuclear Receptor NHR-62 in Caenorhabditis elegans
Source: PLoS Genet. 2013 Jul 25;9(7):e1003651. doi: 10.1371/journal.pgen.1003651 (PMC3723528; doi:10.1371/journal.pgen.1003651)
Supplement: Table S8 — qPCR primers. (XLSX) [file pgen.1003651.s016.xlsx]

## Sheet: Sheet1
qRT-PCR Primers	Forward Primer	Reverse Primer
ama-1	GGATGGAATGTGGGTTGAGA	CGGATTCTTGAATTTCGCGC
cdc-42	CTGCTGGACAGGAAGATTACG	CTCGGACATTCTCGAATGAAG
gst-21	GCTCAAGCGGATTCCTATATCG	GCATGCGCGGAATGAAG
col-146	TTGGTAACAATCGCCAGCATT	AACAGTGAAGAGGCAAGCAACA
C42D4.3	CGTGCCCAATGCAAGCA	TCTTTTCCTTGAGCAGCACAGA
col-91	CCGTTCACCAAAGGAAATGC	GTCTGGAAGAGCGGCTTGAC
F57A8.6	CTGCGCAAAGATGGTGTGAT	GTGCTTGTTCCTTTTCAAATCGA
acd-1	TGGCCGATCAGCTGGATT	TCCGGGAGTCAGGTTGATTT
lgg-1	TGGTCCCATCCGATCTTACTG	CGAAGTTGGATGCGTTTTCTG
fat-2	GTCCTCTGCGACTATTCTGTC	GCTTCGTAGACCTCAATATCC
acdh-2	GCGTGCAGGAACCATTGC	CATATTCCCCAACGATTGATGTT
lbp-8	ATCGGAGTTGGTCTTCTTATTCG	CGTGGAGTATTGATTGAAATGCC
C09B8.4	GCGCTCCATCCATTCCATT	AGAAGGCGTTGAAAGCATCATAG
clec-70	CGCTCGCACTGCATTCG	CATTTTTACTGAGGCCAATCCAA
R11E3.2	GACGAAAGTGGCTAGTCGGATT	TCCAGCGATCAGCAGAAAGA
vit-3	TCTCTATCAACGGAAAGGTTTCAA	GGATACCAGAAGCGCATCTCA
vit-4	AAGCTGTTGATGATCGTTACATTCA	GATTTTTGGCCATTGCTCAGA
fat-7	TCCAGAGAAAGCACTATTTCC	AGTGTGAAACAATAACGGAATG
grl-21	CAAAGCAGCCATTCGAATACC	TGAATCATTTGTCACTGAGCAGAA
C40H1.8	AAACTTTCCCGTACAACTTCCA	GTAGTTGTTGTACCAGACTTCAG
C40H1.7	TTGCGAGCAAGCAGATCAAC	GGTCGGCATTTGACAGGTTCT
C40H1.9	TCTAGCCTCGGCTTCCCATA	CATTGTAGGAATTTGGTTGTCAAGA
